# Supplementary material
Source: publisher figshare collection journal article supplement (https://plos.figshare.com/articles/dataset/_/21687686)
Supplement: Supplementary file 1 [file 1]

## Sheet: README
This file is part of the dataset: Public Library of Science (2022) PLOS Open Science Indicators. Figshare. Dataset (version 1). https://doi.org/10.6084/m9.figshare.21687686.
Contact Information
Name:	Iain Hrynaszkiewicz
ORCID:	0000-0002-9673-5559
Institution:	Public Library of Science
Email:	ihrynaszkiewicz@plos.org / plos@plos.org
Alternate Contact Information
Name:	Lauren Cadwallader
ORCID:	0000-0002-7571-3502
Institution:	Public Library of Science
Email:	lcadwallader@plos.org / plos@plos.org
Licence:	CC BY 4.0
Version:	1
Prepared:	2022-12-07
Prepared by:	Lauren Cadwallader
This file contains the list of repositories used to populate the "Repositories" column in the files PLOS-Dataset_v1_Dec22.csv and Comparator-Dataset_v1_Dec22.csv.
The repositories included in the list are the ones most commonly used in the PLOS-Dataset_v1_Dec22.csv corpus of articles as well as popular domain repositories. This list is not a complete record of every repository used in this dataset, and will continue to be built upon with future data releases.

## Sheet: working list
Repository Name	Repository URL	Type persistent identifier	Regex Accession ID Statements	Regex URL Statements
dbSNP	http://www.ncbi.nlm.nih.gov/snp	Accession ID	ss\d{10}(?=\)|]|,|\.\s|\s|$)	ncbi\.nlm\.nih\.gov/projects/SNP
NCBI Bioproject	https://www.ncbi.nlm.nih.gov/bioproject/	Accession ID	PRJN[A-Z]\d+(?=\)|]|,|\.|-|\.\s|\s|$)	ncbi\.nlm\.nih\.gov/bioproject
DDBJ Bioproject	https://www.ddbj.nig.ac.jp/bioproject/	Accession ID	PRJD[A-Z]\d+(?=\)|]|,|\.|-|\.\s|\s|$)	ddbj\.nig\.ac\.jp/bioproject
ENA/EBI Bioproject	N/A	Accession ID	PRJE[AC-Z]\d+(?=\)|]|,|\.|-|\.\s|\s|$)	NA
NCBI Biosample	www.ncbi.nlm.nih.gov/biosample/	Accession ID	SAMN\d+(?=\)|]|,|\.|-|\.\s|\s|$)	ncbi\.nlm\.nih\.gov/biosample
DDBJ Biosample	https://www.ddbj.nig.ac.jp/biosample/	Accession ID	SAMD\d+(?=\)|]|,|\.|-|\.\s|\s|$)	ddbj\.nig\.ac\.jp/biosample
ENA/EBI Biosample	https://www.ebi.ac.uk/biosamples/	Accession ID	SAME\d+(?=\)|]|,|\.|-|\.\s|\s|$)	ebi\.ac\.uk/biosamples
European Variation Archive	http://www.ebi.ac.uk/eva/	Accession ID	PRJEB\d+(?=\)|]|,|\.|-|\.\s|\s|$)	ebi\.ac\.uk/eva/\?eva-study=
DDBJ Sequence Read Archive	https://www.ddbj.nig.ac.jp/dra/	Accession ID	DR[APRSXZ]\d+(?=\)|]|,|\.|-|\.\s|\s|$)	ddbj\.nig\.ac\.jp/dra
ENA or EBI Sequence Read Archive	https://www.ebi.ac.uk/ena/	Accession ID	ER[APRSXZ]\d+(?=\)|]|,|\.|-|\.\s|\s|$)	ebi\.ac\.uk/ena
NCBI Sequence Read Archive	http://www.ncbi.nlm.nih.gov/sra	Accession ID	SR[APRSXZ]\d+(?=\)|]|,|\.|-|\.\s|\s|$)	ncbi\.nlm\.nih\.gov/sra
Protein Circular Dichroism Data Bank	http://pcddb.cryst.bbk.ac.uk/	Accession ID	CD\w{10}(?=\)|]|,|\.\s|\s|$)	pcddb\.cryst\.bbk\.ac\.uk/record\.php\?id=
Coherent X-ray Imaging Data Bank	http://www.cxidb.org/	DOI	10\.11577\/\w+(?=\)|]|,|\.\s|\s|$)	cxidb\.org
Biological Magnetic Resonance Data Bank	http://www.bmrb.wisc.edu/	DOI	10\.13018\/\w+(?=\)|]|,|\.\s|\s|$)	bmrb\.io/data_library/summary/\?bmrbId=
Structural Biology Data Grid	https://data.sbgrid.org/	DOI	10\.15785\/SBGRID\/\w+(?=\)|]|,|\.\s|\s|$)	data\.sbgrid\.org/dataset
NeuroMorpho.org	http://neuromorpho.org/neuroMorpho/index.jsp	Accession ID	NMO_\w+(?=\)|]|,|\.\s|\s|$)	neuromorpho\.org/neuron_info\.jsp\?neuron_name
Functional Connectomes Project International Neuroimaging Data-Sharing Initiative	http://fcon_1000.projects.nitrc.org/	DOI	10\.15387\/\w+(?=\)|]|,|\.\s|\s|$)	http://fcon_1000\.projects\.nitrc\.org/indi/pro
OpenfMRI	http://openfmri.org/	Accession ID	ds\w{6}(?=\)|]|,|\.\s|\s|$)	openfmri\.org/dataset
ArrayExpress	http://www.ebi.ac.uk/arrayexpress/	Accession ID	E-[a-zA-Z]{4}-(\d{5}|\d{4})(?=\)|]|,|\.\s|\s|$)	ebi\.ac\.uk/arrayexpress
Gene Expression Omnibus	http://www.ncbi.nlm.nih.gov/geo/	Accession ID	GS[ME]\w+(?=\)|]|,|\.|-|\.\s|\s|$)	/www\.ncbi\.nlm\.nih\.gov/(gds|geo)
GenomeRNAi	http://www.genomernai.org/	Accession ID	GR\w{5}-\w-\w(?=\)|]|,|\.\s|\s|$)	genomernai\.org/v16/singleExpPhenotypes
dbGAP	http://www.ncbi.nlm.nih.gov/gap	Accession ID	pht\w{6}\.v(.+).p\w+(?=\)|]|,|\.\s|\s|$)	ncbi\.nlm\.nih\.gov/projects/gap/cgi-bin/dataset\.cgi\?study_id=
The European Genome-phenome Archive	http://www.ebi.ac.uk/ega/	Accession ID	EGAD\w{9}53(?=\)|]|,|\.\s|\s|$)	(ega-archive\.org/|ebi\.ac\.uk/ega)
IntAct	http://www.ebi.ac.uk/intact/	Accession ID	EBI-\w+(?=\)|]|,|\.\s|\s|$)	ebi\.ac\.uk/intact/details/interaction
Japanese Genotype-phenotype Archive	http://trace.ddbj.nig.ac.jp/jga/index_e.html	Accession ID	JGAD\w{11}(?=\)|]|,|\.\s|\s|$)	humandbs\.biosciencedbc\.jp
MetaboLights	http://www.ebi.ac.uk/metabolights/	Accession ID	MTBL[SC]\w+(?=\)|]|,|\.\s|\s|$)	ebi\.ac\.uk/metabolights
PeptideAtlas	http://www.peptideatlas.org/	Accession ID	PAp\w{8}(?=\)|]|,|\.\s|\s|$)	db\.systemsbiology\.net/sbeams/cgi/PeptideAtlas
PRIDE Archive	http://www.ebi.ac.uk/pride/	Accession ID	PXD\w{6}(?=\)|]|,|\.\s|\s|$)	ebi\.ac\.uk/pride/archive/projects
ProteomeXchange	http://www.proteomexchange.org/	Accession ID	PXD\w{6}(?=\)|]|,|\.\s|\s|$)	proteomexchange\.org
KNB: The Knowledge Network for Biocomplexity	https://knb.ecoinformatics.org/	DOI	10\.5063\/\w{8}(?=\)|]|,|\.\s|\s|$)	knb\.ecoinformatics\.org/view
The Global Biodiversity Information Facility	http://www.gbif.org/	DOI	10\.15470\/\w+(?=\)|]|,|\.\s|\s|$)	ipt\.gbif\.es/resource\?r=
MorphoBank.org	http://www.morphobank.org/	DOI	10\.7934\/\w+(?=\)|]|,|\.\s|\s|$)	morphobank\.org/index\.php/Projects
FlowRepository	https://flowrepository.org/	Accession ID	FR-FCM-\w+(?=\)|]|,|\.\s|\s|$)	flowrepository\.org/id
FlyBase	http://flybase.org/	Accession ID	FB\w{9}(?=\)|]|,|\.\s|\s|$)	flybase\.org/reports
Mouse Genome Informatics	http://www.informatics.jax.org/	Accession ID	MGI:\w{7}(?=\)|]|,|\.\s|\s|$)	informatics\.jax\.org/marker
Xenbase	http://www.xenbase.org/common/	Accession ID	XB-GENE-\w+(?=\)|]|,|\.\s|\s|$)	xenbase\.org/gene
ClinicalTrials.gov	http://clinicaltrials.gov/	Accession ID	NCT\w{8}(?=\)|]|,|\.\s|\s|$)	clinicaltrials\.gov/ct2/show
PhysioNet	http://physionet.org/	DOI	10\.13026\/\w+(?=\)|]|,|\.\s|\s|$)	physionet\.org/content
National Database for Clinical Trials related to Mental Illness	http://ndct.nimh.nih.gov/	DOI	10\.15154\/\w+(?=\)|]|,|\.\s|\s|$)	nda\.nih\.gov/study\.html\?id
ChEMBL	https://www.ebi.ac.uk/chembl/	Accession ID	CHEMBL\w+(?=\)|]|,|\.\s|\s|$)	ebi\.ac\.uk/chembl
Oak Ridge National Laboratory Distributed Active Archive Center	http://daac.ornl.gov/	DOI	10\.3334\/\w+(?=\)|]|,|\.\s|\s|$)	daac\.ornl\.gov
World Data Center for Climate at DRKZ	http://www.wdc-climate.de/	DOI	10\.1594\/\w+(?=\)|]|,|\.\s|\s|$)	wdc-climate\.de
LTER Network Information System Data Portal	http://portal.lternet.edu/	DOI	10\.6073\/\w+(?=\)|]|,|\.\s|\s|$)	portal\.edirepository\.org
PANGAEA	http://www.pangaea.de/	DOI	10\.5194\/\w+(?=\)|]|,|\.\s|\s|$)	pangaea\.de
EarthChem	http://www.earthchem.org/	DOI	10\.1594\/IEDA\/\w+(?=\)|]|,|\.\s|\s|$)	ecl\.earthchem\.org
Marine Geosciences Data System	http://www.marine-geo.org/index.php	DOI	10\.1594\/IEDA\/\w+(?=\)|]|,|\.\s|\s|$)	get\.iedadata\.org/doi
SEANOE	http://www.seanoe.org	DOI	10\.17882\/\w+(?=\)|]|,|\.\s|\s|$)	seanoe\.org/data
NASA Goddard Earth Sciences Data and Information Services Center	http://disc.gsfc.nasa.gov/	DOI	10\.5067\/\w+(?=\)|]|,|\.\s|\s|$)	disc\.gsfc\.nasa\.gov/datasets
AEKOS - TERN Ecoinformatics	http://www.aekos.org.au/	DOI	10\.4227\/05\/\w+(?=\)|]|,|\.\s|\s|$)	portal\.tern\.org\.au
UNAVCO, Inc.	http://www.unavco.org/data/data.html	DOI	10\.7283\/\w+(?=\)|]|,|\.\s|\s|$)	unavco\.org/data/doi
NoMaD Repository	http://nomad-repository.eu/	DOI	10\.17172\/NOMAD\/\w+(?=\)|]|,|\.\s|\s|$)	nomad-lab\.eu/prod/v1/gui/dataset
UK Data Service - ReShare	http://reshare.ukdataservice.ac.uk/	DOI	10\.5255\/UKDA-SN-\w+(?=\)|]|,|\.\s|\s|$)	ukdataservice\.ac\.uk/datacatalogue
openICSPR	https://www.openicpsr.org/	DOI	10\.3886\/\w+(?=\)|]|,|\.\s|\s|$)	openicpsr\.org/openicpsr/project
Dryad Digital Repository	http://datadryad.org/	DOI	10\.5061\/dryad\.\w+(?=\)|]|,|\.\s|\s|$)	datadryad\.org/(stash/)?
figshare	http://figshare.com/	DOI	10\.6084\/m9\.figshare\.[\w\.]+(?=\)|]|,|\.\s|\s|$)	figshare\.com
Harvard Dataverse	http://dataverse.harvard.edu	DOI	10\.7910\/(dvn|DVN)\/\w+(?=\)|]|,|\.\s|\s|$)	dataverse\.harvard\.edu
Open Science Framework	https://osf.io/	DOI	10\.17605\/(OSF|osf)\.(IO|io)\/\w+(?=\)|]|,|\.\s|\s|$)	osf\.io
Zenodo	https://zenodo.org/	DOI	10\.5281\/zenodo\.\w+(?=\)|]|,|\.\s|\s|$)	zenodo\.org
dbVar	http://www.ncbi.nlm.nih.gov/dbvar/	Accession ID	n(std|sv|ssv)\d+(?=\)|]|,|\.\s|\s|$)	ncbi\.nlm\.nih\.gov/dbvar
Database of Genomic Variants Archive	http://www.ebi.ac.uk/dgva/	Accession ID	e(std|sv|ssv)\d+(?=\)|]|,|\.\s|\s|$)	ebi\.ac\.uk/dgva
Zebrafish Model Organism Database	http://zfin.org/	Accession ID	ZDB-(GENE|FISH)-\d{6}-\d(?=\)|]|,|\.\s|\s|$)	zfin\.org/ZDB
BioModels Database	http://biomodels.net/	Accession ID	(MODEL|BIOMD)\d{10}(?=\)|]|,|\.\s|\s|$)	ebi\.ac\.uk/biomodels
Crystallography Open Database	http://www.crystallography.net/	Accession ID	NA	crystallography\.net/cod
EMDataBank	http://www.emdatabank.org/	Accession ID	NA	emdataresource\.org
Database of Interacting Proteins	http://dip.doe-mbi.ucla.edu/dip/Main.cgi	Accession ID	NA	dip\.doe-mbi\.ucla\.edu/dip
Integrated Taxonomic Information System	http://www.itis.gov/	Accession ID	NA	itis\.gov/ITISWebService/services/ITISService
NCBI Taxonomy	http://www.ncbi.nlm.nih.gov/taxonomy	Accession ID	NA	ncbi\.nlm\.nih\.gov/Taxonomy/Browser/tax\.cgi\?id=
Kinetic Models of Biological Systems	http://www.kimosys.org/	Accession ID	NA	kimosys\.org/repository
Rat Genome Database	http://rgd.mcw.edu/	Accession ID	NA	rgd\.mcw\.edu/rgdweb/report/gene/main\.html\?id
National Addiction & HIV Data Archive Program	http://www.icpsr.umich.edu/icpsrweb/NAHDAP/index.jsp	Accession ID	NA	icpsr\.umich\.edu
Virtual Skeleton Database (SICAS medical image repository)	https://www.virtualskeleton.ch/	Accession ID	NA	smir\.ch
caNanoLab	http://cananolab.nci.nih.gov/caNanoLab/	Accession ID	NA	cananolab\.cancer\.gov
NCBI PubChem BioAssay	http://pubchem.ncbi.nlm.nih.gov/	Accession ID	NA	pubchem\.ncbi\.nlm\.nih\.gov/bioassay
NCBI PubChem Substance	http://pubchem.ncbi.nlm.nih.gov/	Accession ID	NA	pubchem\.ncbi\.nlm\.nih\.gov/substance
Australian Ocean Data Network	http://portal.aodn.org.au/aodn/	Accession ID	NA	catalogue-imos\.aodn\.org\.au/geonetwork/srv/eng/metadata\.show\?uuid=
Reaction Database Standard Search Interface	www.hepdata.net/record/	Accession ID	NA	hepdata\.net/record
SIMBAD Astronomical Database	http://simbad.u-strasbg.fr/simbad/	Accession ID	NA	cds\.u-strasbg\.fr
Archaeology Data Service	http://archaeologydataservice.ac.uk/	N/A	NA	archaeologydataservice\.ac\.uk/archsearch
UK Solar System Data Centre	http://www.ukssdc.ac.uk/	N/A	NA	ukssdc\.ac\.uk
NERC Data Centres	http://www.nerc.ac.uk/research/sites/data/	N/A	NA	nerc\.ac\.uk/research/sites/data
NOAA National Centers for Environmental Information	http://www.ncei.noaa.gov/	N/A	NA	ncei\.noaa\.gov
Cancer Imaging Archive	http://www.cancerimagingarchive.net/	Accession ID	NA	wiki\.cancerimagingarchive\.net/display/Public
VectorBase	http://www.vectorbase.org/index.php	Accession ID	NA	vectorbase\.org/vectorbase/app/record
Eukaryotic Pathogen Database Resources	http://eupathdb.org/eupathdb/	Accession ID	NA	veupathdb\.org/veupathdb/app/record
Biological General Repository for Interaction Datasets	http://thebiogrid.org/	Accession ID	NA	thebiogrid\.org
Worldwide Protein Data Bank	http://wwpdb.org/	Accession ID	NA	wwpdb\.org
UniProt	http://www.uniprot.org	Accession ID	NA	uniprot\.org
EBI Metagenomics	http://www.ebi.ac.uk/metagenomics	Accession ID	NA	ebi\.ac\.uk/metagenomics
Github	https://github.com/	N/A	NA	github\.com
Data Archiving and Networked Services (DANS)	easy.dans.knaw.nl/ui/datasets/id/	DOI	10\.17026/dans-\w{3}-\w{4}(?=\)|]|,|\.\s|\s|$)	easy\.dans\.knaw\.nl/ui/datasets/id
Protocols.io	http://protocols.io/	DOI	10\.17504\.protocols\.io\.\w+(?=\)|]|,|\.\s|\s|$)	protocols\.io
Demographic and Health Surveys	dhsprogram.com/	N/A	NA	dhsprogram\.com
Institute for Clinical Evaluative Sciences (ICES)	ices.on.ca/	N/A	NA	ices\.on\.ca/
National Health Insurance Sharing Service, Korea	nhiss.nhis.or.kr	N/A	NA	nhiss\.nhis\.or\.kr
Ministry of Health and Welfare, Taiwan	dep.mohw.gov.tw	N/A	NA	dep\.mohw\.gov\.tw
UK Biobank	ukbiobank.ac.uk	N/A	NA	ukbiobank\.ac\.uk
Biologic Specimen and Data Repository Information Coordinating Center (BioLINCC)	biolincc.nhlbi.nih.gov	N/A	NA	biolincc\.nhlbi\.nih\.gov
Kaggle	kaggle.com	DOI	10\.34740\/kaggle\/dsv\/\d+(?=\)|]|,|\.|\_|\s|\s|$)	kaggle\.com
Centre for Disease Control (CDC)	cdc.gov	N/A	NA	cdc\.gov
Electron Microscopy DataBank (EMDB)	ebi.ac.uk/emdb/	Accession ID	EMD-\d{5}(?=\)|]|\.\s|\s|$)	ebi\.ac\.uk/emdb
World Health Organization	https://www.who.int/	N/A	NA	who\.int
Surveillance, Epidemiology, and End Results Program	seer.cancer.gov	N/A	NA	seer\.cancer\.gov
RCSB Protein Data Bank	rcsb.org	Accession ID	NA	rcsb\.org
Mendeley Data	data.mendeley.com	DOI	10\.17632\/\w{10}\.\d+(?=\)|]|,|\.\s|\s|$)	data\.mendeley\.com/datasets
Git Lab	gitlab.com	N/A	NA	gitlab\.com
Statistics Canada	https://statcan.gc.ca/	DOI	10\.25318\/(\w|-)+(?=\)|]|,|\.\s|\s|$)	statcan\.gc\.ca
University of Bristol	https://data.bris.ac.uk/data/	DOI	10\.5523\/bris\.\w+(?=\)|]|,|\.\s|\s|$)	data\.bris\.ac\.uk\/data
The University of Sheffield Online Research Data	https://orda.shef.ac.uk/	DOI	10\.15131\/shef\.data\.\d+\.\w+(?=\)|]|,|\.\s|\s|$)	orda\.shef\.ac\.uk
ClinicalStudyDataRequest.com (CSDR)	https://clinicalstudydatarequest.com/	Accession ID	NCT\d+(?=\)|]|,|\.\s|\s|$)	clinicalstudydatarequest\.com
UNICEF Multiple Indicator Cluster Surveys	https://mics.unicef.org/	DOI	NA	mics\.unicef\.org
The World Bank (Microdata Library)	https://microdata.worldbank.org/	DOI	10\.48529\/\w+-\w+(?=\)|]|,|\.\s|\s|$)	microdata\.worldbank\.org
DataverseNL	https://dataverse.nl/dataverse/root	DOI	10\.34894\/\w+(?=\)|]|,|\.\s|\s|$)	dataverse\.nl\/dataverse\/root
GIN	https://gin.g-node.org/	DOI	10\.12751\/g\-node\.\w+(?=\)|]|,|\.\s|\s|$)	gin\.g\-node\.org
Rush Alzheimer's Disease Center (RADC) Research Resource Sharing Hub	https://radc.rush.edu/	N/A	NA	radc\.rush\.edu
UCI Machine Learning Repository	https://archive.ics.uci.edu/	N/A	NA	archive\.ics\.uci\.edu
Ministry of Health, Labour and Welfare (Japan)	https://mhlw.go.jp/	Accession ID	NA	dra4\.nihs\.go\.jp\/mhlw\_data
Healthcare Cost and Utilization Project (HCUP)	https://hcup-us.ahrq.gov/	N/A	NA	hcup\-us\.ahrq\.gov
GenomeNet	https://genome.jp/	Accession ID	NA	genome\.jp
London School of Hygiene & Tropical Medicine	https://researchonline.lshtm.ac.uk/	DOI	10\.17037\/PUBS\.\d+(?=\)|]|,|\.\s|\s|$)	researchonline\.lshtm\.ac\.uk
Swedish National Data Service	https://snd.gu.se/	DOI	10\.5878\/\w+\-\w+(?=\)|]|,|\.\s|\s|$)	snd\.gu\.se
SourceForge	https://sourceforge.net/	N/A	NA	sourceforge\.net
China National Knowledge Infrastructure	https://data.cnki.net/	DOI	NA	data\.cnki\.net
Borealis	https://borealisdata.ca/	DOI	10\.5683\/SP\d\/\w+(?=\)|]|,|\.\s|\s|$)	borealisdata\.ca
Comprehensive R Archive Network	https://cran.r-project.org/	DOI	NA	cran\.r\-project\.org
European Commission	https://data.europa.eu	Accession ID	88u\/dataset\/\w+(?=\)|]|,|\.\s|\s|$)	data\.europa\.eu
Clinical Practice Research Datalink	https://cprd.com/	DOI	10\.48329\/\w+\-\w+(?=\)|]|,|\.\s|\s|$)	cprd\.com
Socialstyrelsen	https://socialstyrelsen.se/	N/A	NA	socialstyrelsen\.se
Datatilsynet	https://datatilsynet.dk/	N/A	NA	datatilsynet\.dk
PubMLST (Public databases for molecular typing and microbial genome diversity)	https://pubmlst.org/	N/A	NA	pubmlst\.org
Commission Nationale de l'Informatique et des Libertés	https://cnil.fr/	N/A	NA	cnil\.fr
National Health Insurance Research Database	https://nhird.nhri.org.tw/	Accession ID	NHRI\-NHIRD\-\d+(?=\)|]|,|\.\s|\s|$)	nhird\.nhri\.org\.tw
Survey of Health, Ageing and Retirement in Europe	http://share-project.org/	DOI	10\.6103\/SHARE\.\w+\.\w+(?=\)|]|,|\.\s|\s|$)	share\-project\.org
SAIL Databank	https://saildatabank.com/	N/A	NA	saildatabank\.com
Optum	https://optum.com/	N/A	NA	optum\.com
University of Bristol	https://data.bris.ac.uk/data/	DOI	10\.5523\/bris\.\w+(?=\)|]|,|\.\s|\s|$)	data\.bris\.ac\.uk\/data
The World Bank (DataBank)	https://databank.worldbank.org/	DOI	10\.1596\/978\-\d+\-\d+\-\d+\-\d+(?=\)|]|,|\.|\_|\s|\s|$)	databank\.worldbank\.org
Folkehelseinstituttet (Norwegian Institute of Public Health)	https://fhi.no/	N/A	NA	fhi\.no
National Bureau of Statistics of China	http://stats.gov.cn/	N/A	NA	stats\.gov\.cn
The Humanitarian Data Exchange	https://data.humdata.org/	N/A	NA	data\.humdata\.org
