# Supplementary material
Source: publisher figshare collection journal article supplement (https://plos.figshare.com/articles/dataset/_/21687686)
Supplement: Supplementary file 3 [file 1]

## Open Science Indicators Column Descriptions

This file was prepared on 7-12-2022 by Allegra Pearce and Lauren Cadwallader and is part of the dataset: Public Library of Science (2022) PLOS Open Science Indicators. Figshare. Dataset (version 1).

<https://doi.org/10.6084/m9.figshare.21687686>.

### Named contact Information

Name: Iain Hrynaskiewicz

ORCID: 0000-0002-9673-5559

Institution: Public Library of Science

Email: [ihrynaskiewicz@plos.org](mailto:ihrynaskiewicz@plos.org) / plos@plos.org

### Alternate Contact Information

Name: Lauren Cadwallader

ORCID: 0000-0002-7571-3502

Institution: Public Library of Science

Email: [lcadwallader@plos.org](mailto:lcadwallader@plos.org) / plos@plos.org

Column descriptions for data provided in PLOS-Dataset\_v1\_Dec22.csv and Comparator-Dataset\_v1\_Dec22.csv. The Method column indicates how data is gathered, whether from XML file data or found by DataSeer's assessment.

| Column Name      | Column description                   | Method | Additional Notes                        | Present in comparator set?<br>Additional notes.                                                                            |
|------------------|--------------------------------------|--------|-----------------------------------------|----------------------------------------------------------------------------------------------------------------------------|
| Publication date | Date of publication for each article | XML    | "epub" date is used, format: dd/mm/yyyy | Yes. Some dates are not in the standard format. Other formats are month-month/yyyy (e.g. Jul-Sept/2020), mm/yyyy and yyyy. |
| Publication Year | Year of publication for each article | XML    |                                         | Yes                                                                                                                        |

|                                |                                                                                                          |          |                                                                                                                                                                                                   |                                                                                                                                                                                                  |
|--------------------------------|----------------------------------------------------------------------------------------------------------|----------|---------------------------------------------------------------------------------------------------------------------------------------------------------------------------------------------------|--------------------------------------------------------------------------------------------------------------------------------------------------------------------------------------------------|
| DOI                            | Digital object identifier (DOI) for each article                                                         | XML      |                                                                                                                                                                                                   | Yes                                                                                                                                                                                              |
| Discipline                     | A list of all disciplines each article is identified as                                                  | XML      |                                                                                                                                                                                                   | Yes. Labelled as 'Major Mesh Terms', list of identified Major MeSH terms for each article                                                                                                        |
| Country                        | Country of the listed affiliation of the first listed corresponding author                               | XML      | If multiple affiliations are listed the first one is used. If multiple corresponding authors are listed, the first listed corresponding author is used.                                           | Yes (only present for ~3% of sample)                                                                                                                                                             |
| DA                             | The article's data availability statement                                                                | XML      |                                                                                                                                                                                                   | Yes. It comprises any Availability type statements (e.g. Data Availability or Code Availability) found in the article. If multiple statements are found they are separated by the " " character. |
| Data_Section<br>Text:Generated | Which sections of the research article indicated data was generated when assessed by DataSeer algorithm. | DataSeer | Labeled N/A if no data/code generation detected.<br>Multiple sections are separated by " " (e.g. Methods Supplementary)<br>If XML section tags are not available this will be labeled "Full Text" | Yes                                                                                                                                                                                              |
| Data_Generated                 | Was data generated in this text as                                                                       |          | Labeled "Yes" or "No"                                                                                                                                                                             | Yes                                                                                                                                                                                              |

|                                |                                                                                                                                                                                                                                                                                                                                        |          |                                                                                                                                                                                           |     |
|--------------------------------|----------------------------------------------------------------------------------------------------------------------------------------------------------------------------------------------------------------------------------------------------------------------------------------------------------------------------------------|----------|-------------------------------------------------------------------------------------------------------------------------------------------------------------------------------------------|-----|
|                                | assessed by DataSeer algorithm.                                                                                                                                                                                                                                                                                                        | DataSeer |                                                                                                                                                                                           |     |
| Data_Shared                    | Was data shared in this text as assessed by DataSeer algorithm.                                                                                                                                                                                                                                                                        | DataSeer | Labeled “Yes” or “No”                                                                                                                                                                     | Yes |
| Data_location                  | Location of data that was indicated as shared.                                                                                                                                                                                                                                                                                         | DataSeer | Labeled “Online” when a repository was used.<br><br>Multiple sections are separated by “ ” (e.g. Online Supplementary)                                                                    | Yes |
| URL                            | A list of any URL/DOIs if host data or code online that were detected by DataSeer algorithm.                                                                                                                                                                                                                                           | DataSeer | Multiple URLs or DOIs separated by “,”                                                                                                                                                    | Yes |
| Accessions                     | A list of Accession IDs from identified repositories that host data or code online that were detected by DataSeer algorithm.                                                                                                                                                                                                           | DataSeer | Multiple Accession IDs separated by “,”                                                                                                                                                   | Yes |
| Repositories                   | A list of standard repositories that were identified by DataSeer as having been used in the sharing of data/code in each article. Repositories are identified from URL/DOI/Accession IDs where possible. Only repositories from a standardized list will be identified. Domains will be provided for unidentified URLs where possible. | DataSeer | Multiple repositories separated by “ ” (e.g. Github Dryad)                                                                                                                                | Yes |
| Code_Section<br>Text:Generated | Which sections of the research article indicated code was generated when assessed by DataSeer algorithm.                                                                                                                                                                                                                               | DataSeer | Labeled N/A if no code generation detected. Multiple sections are separated by “ ” (e.g. Methods Supplementary)<br>If XML section tags are not available this will be labeled “Full Text” | Yes |

|                 |                                                                                                               |                   |                                                                                                                                                                                                      |     |
|-----------------|---------------------------------------------------------------------------------------------------------------|-------------------|------------------------------------------------------------------------------------------------------------------------------------------------------------------------------------------------------|-----|
| Code_Generated  | Was code generated in this text as assessed by DataSeer algorithm.                                            | DataSeer          | Labeled “Yes” or “No”                                                                                                                                                                                | Yes |
| Code_Shared     | Was code shared in this text as assessed by DataSeer algorithm.                                               | DataSeer          | Labeled “Yes” or “No”<br>Note: Shared <i>code is only detected if it is executable</i> (e.g. shared as a .R or .py file format), code shared in pdf of other image formats is not labeled as shared. | Yes |
| Code_location   | Location of code that was indicated as shared.                                                                | DataSeer          | Labeled “Online” when a repository was used.<br><br>Multiple sections are separated by “ ” (e.g. Online Supplementary)                                                                               | Yes |
| Preprint_Match  | Whether a preprint was identified for this published article when searching common DOI registration agencies. | DataSeer          | “Yes” or “No” indicating whether a match was found across DOI registration agencies. Match is completed using title and author information.<br>Queries Crossref and Datacite.                        | Yes |
| Preprint_DOI    | DOI of identified preprint match.                                                                             | Preprint Metadata | Gathered from DOI agency metadata.                                                                                                                                                                   | Yes |
| Preprint_Date   | Date of preprint DOI registration, usually same date as publication.                                          | Preprint Metadata | Note: Datacite metadata does not always include a detailed date (will sometimes only include year level). Format: dd/mm/yyyy or yyyy.                                                                | Yes |
| Preprint_URL    | URL to access top preprint match.                                                                             | Preprint Metadata | Provided where available, dependent on metadata.                                                                                                                                                     | Yes |
| Preprint_Server | Server top preprint match is hosted on.                                                                       | Preprint Metadata | If server name is not provided in preprint metadata DOI prefix is used to identify server when possible.                                                                                             | Yes |
