# Supplementary material
Source: publisher figshare collection journal article supplement (https://plos.figshare.com/articles/dataset/_/21687686)
Supplement: Supplementary file 3 [file 3]

## Sheet: README
This file is part of the dataset: Public Library of Science (2022) PLOS Open Science Indicators. Figshare. Dataset (version 3). https://doi.org/10.6084/m9.figshare.21687686.
Contact Information
Name:	Iain Hrynaszkiewicz
ORCID:	0000-0002-9673-5559
Institution:	Public Library of Science
Email:	ihrynaszkiewicz@plos.org / plos@plos.org
Alternate Contact Information
Name:	Lauren Cadwallader
ORCID:	0000-0002-7571-3502
Institution:	Public Library of Science
Email:	lcadwallader@plos.org / plos@plos.org
Licence:	CC BY 4.0
Version:	1
Exported:	03/05/2023 from Digital Science’s Dimensions platform, available at https://app.dimensions.ai.
Prepared:	2023-06-21
Prepared by:	Lauren Cadwallader
This file contains the summary statistics used to inform the analysis and create the figures in the blog post https://theplosblog.plos.org/2023/06/Open-Science-Indicators-Update-Q1-2023.

## Sheet: Data
DOI	Fields of Research (ANZSRC 2020)
10.1371/journal.pone.0227388	35 Commerce, Management, Tourism and Services; 3505 Human Resources and Industrial Relations; 42 Health Sciences; 4206 Public Health
10.1371/journal.pone.0227366	32 Biomedical and Clinical Sciences; 3202 Clinical Sciences; 3204 Immunology; 3211 Oncology and Carcinogenesis
10.1371/journal.pone.0227324	32 Biomedical and Clinical Sciences; 3202 Clinical Sciences
10.1371/journal.pone.0227283	32 Biomedical and Clinical Sciences; 40 Engineering; 4003 Biomedical Engineering
10.1371/journal.pone.0227280	42 Health Sciences; 4203 Health Services and Systems; 44 Human Society
10.1371/journal.pone.0227266	32 Biomedical and Clinical Sciences; 3212 Ophthalmology and Optometry
10.1371/journal.pone.0227247	42 Health Sciences; 4201 Allied Health and Rehabilitation Science; 4207 Sports Science and Exercise
10.1371/journal.pone.0227226	31 Biological Sciences; 3101 Biochemistry and Cell Biology; 3106 Industrial Biotechnology
10.1371/journal.pone.0227219	32 Biomedical and Clinical Sciences; 3213 Paediatrics
10.1371/journal.pone.0227202	31 Biological Sciences; 3101 Biochemistry and Cell Biology; 32 Biomedical and Clinical Sciences
10.1371/journal.pone.0227200	32 Biomedical and Clinical Sciences; 3209 Neurosciences; 3214 Pharmacology and Pharmaceutical Sciences; 52 Psychology; 5202 Biological Psychology
10.1371/journal.pone.0227197	32 Biomedical and Clinical Sciences; 42 Health Sciences; 4203 Health Services and Systems
10.1371/journal.pone.0227194	30 Agricultural, Veterinary and Food Sciences; 3009 Veterinary Sciences
10.1371/journal.pone.0227126	30 Agricultural, Veterinary and Food Sciences; 3009 Veterinary Sciences; 31 Biological Sciences
10.1371/journal.pone.0227123	32 Biomedical and Clinical Sciences; 3202 Clinical Sciences
10.1371/journal.pone.0227102	31 Biological Sciences; 3102 Bioinformatics and Computational Biology; 32 Biomedical and Clinical Sciences
10.1371/journal.pone.0227098	31 Biological Sciences; 3107 Microbiology; 32 Biomedical and Clinical Sciences; 3202 Clinical Sciences; 3207 Medical Microbiology
10.1371/journal.pone.0227096	40 Engineering; 46 Information and Computing Sciences; 4603 Computer Vision and Multimedia Computation; 51 Physical Sciences
10.1371/journal.pone.0227066	32 Biomedical and Clinical Sciences; 3213 Paediatrics
10.1371/journal.pone.0227065	32 Biomedical and Clinical Sciences; 3202 Clinical Sciences
10.1371/journal.pone.0227061	30 Agricultural, Veterinary and Food Sciences; 3009 Veterinary Sciences
10.1371/journal.pone.0227038	32 Biomedical and Clinical Sciences; 3202 Clinical Sciences
10.1371/journal.pone.0227027	32 Biomedical and Clinical Sciences; 3203 Dentistry
10.1371/journal.pone.0227011	31 Biological Sciences; 3102 Bioinformatics and Computational Biology; 3105 Genetics
10.1371/journal.pone.0227004	30 Agricultural, Veterinary and Food Sciences; 3009 Veterinary Sciences
10.1371/journal.pone.0226984	32 Biomedical and Clinical Sciences; 42 Health Sciences; 4206 Public Health
10.1371/journal.pone.0226953	38 Economics; 3801 Applied Economics
10.1371/journal.pone.0226940	31 Biological Sciences; 3101 Biochemistry and Cell Biology
10.1371/journal.pone.0226935	32 Biomedical and Clinical Sciences; 3202 Clinical Sciences; 3207 Medical Microbiology; 3211 Oncology and Carcinogenesis
10.1371/journal.pone.0226918	34 Chemical Sciences; 3406 Physical Chemistry
10.1371/journal.pone.0226900	40 Engineering; 4008 Electrical Engineering; 46 Information and Computing Sciences; 4603 Computer Vision and Multimedia Computation
10.1371/journal.pone.0226881	32 Biomedical and Clinical Sciences; 3215 Reproductive Medicine
10.1371/journal.pone.0226878	31 Biological Sciences; 3105 Genetics
10.1371/journal.pone.0226875	34 Chemical Sciences; 3404 Medicinal and Biomolecular Chemistry
10.1371/journal.pone.0226871	32 Biomedical and Clinical Sciences; 3202 Clinical Sciences
10.1371/journal.pone.0226856	31 Biological Sciences; 3101 Biochemistry and Cell Biology; 3105 Genetics
10.1371/journal.pone.0226854	31 Biological Sciences; 3101 Biochemistry and Cell Biology; 32 Biomedical and Clinical Sciences
10.1371/journal.pone.0226852	32 Biomedical and Clinical Sciences; 3202 Clinical Sciences
10.1371/journal.pone.0226843	32 Biomedical and Clinical Sciences; 3208 Medical Physiology
10.1371/journal.pone.0226828	31 Biological Sciences; 3107 Microbiology; 32 Biomedical and Clinical Sciences; 3202 Clinical Sciences; 3207 Medical Microbiology
10.1371/journal.pone.0226819	31 Biological Sciences; 3103 Ecology; 41 Environmental Sciences
10.1371/journal.pone.0226818	30 Agricultural, Veterinary and Food Sciences; 31 Biological Sciences; 3105 Genetics
10.1371/journal.pone.0226811	31 Biological Sciences; 52 Psychology; 5202 Biological Psychology
10.1371/journal.pone.0226809	32 Biomedical and Clinical Sciences; 42 Health Sciences; 4206 Public Health; 52 Psychology
10.1371/journal.pone.0226771	31 Biological Sciences; 3105 Genetics; 42 Health Sciences; 4202 Epidemiology
10.1371/journal.pone.0226767	32 Biomedical and Clinical Sciences; 3210 Nutrition and Dietetics; 42 Health Sciences
10.1371/journal.pone.0226744	32 Biomedical and Clinical Sciences; 42 Health Sciences; 4206 Public Health
10.1371/journal.pone.0226733	31 Biological Sciences; 3102 Bioinformatics and Computational Biology; 32 Biomedical and Clinical Sciences
10.1371/journal.pone.0226684	46 Information and Computing Sciences; 52 Psychology; 5202 Biological Psychology; 5204 Cognitive and Computational Psychology
10.1371/journal.pone.0226645	32 Biomedical and Clinical Sciences; 3211 Oncology and Carcinogenesis
10.1371/journal.pone.0226640	40 Engineering; 4003 Biomedical Engineering
10.1371/journal.pone.0226593	32 Biomedical and Clinical Sciences; 3211 Oncology and Carcinogenesis
10.1371/journal.pone.0226582	31 Biological Sciences; 3109 Zoology; 32 Biomedical and Clinical Sciences
10.1371/journal.pone.0226529	31 Biological Sciences; 3103 Ecology; 41 Environmental Sciences; 4102 Ecological Applications
10.1371/journal.pone.0226498	32 Biomedical and Clinical Sciences; 3202 Clinical Sciences
10.1371/journal.pone.0226491	31 Biological Sciences; 3103 Ecology; 41 Environmental Sciences; 4102 Ecological Applications
10.1371/journal.pone.0226481	32 Biomedical and Clinical Sciences; 52 Psychology; 5202 Biological Psychology
10.1371/journal.pone.0226372	31 Biological Sciences; 3107 Microbiology
10.1371/journal.pone.0226204	46 Information and Computing Sciences; 4605 Data Management and Data Science; 4606 Distributed Computing and Systems Software
10.1371/journal.pone.0226190	31 Biological Sciences; 3102 Bioinformatics and Computational Biology
10.1371/journal.pone.0226141	30 Agricultural, Veterinary and Food Sciences; 42 Health Sciences; 4203 Health Services and Systems
10.1371/journal.pone.0226113	31 Biological Sciences; 3101 Biochemistry and Cell Biology
10.1371/journal.pone.0225947	42 Health Sciences; 4207 Sports Science and Exercise
10.1371/journal.pone.0225946	39 Education; 3901 Curriculum and Pedagogy; 52 Psychology; 5201 Applied and Developmental Psychology; 5202 Biological Psychology; 5205 Social and Personality Psychology
10.1371/journal.pone.0225863	30 Agricultural, Veterinary and Food Sciences; 3009 Veterinary Sciences
10.1371/journal.pone.0225712	42 Health Sciences; 4203 Health Services and Systems; 44 Human Society
10.1371/journal.pone.0225411	30 Agricultural, Veterinary and Food Sciences; 3008 Horticultural Production
10.1371/journal.pone.0224466	31 Biological Sciences; 3103 Ecology; 41 Environmental Sciences
10.1371/journal.pone.0218904	31 Biological Sciences; 46 Information and Computing Sciences; 4603 Computer Vision and Multimedia Computation
10.1371/journal.pone.0215556	31 Biological Sciences; 3103 Ecology; 3107 Microbiology; 41 Environmental Sciences
10.1371/journal.pone.0207499	32 Biomedical and Clinical Sciences; 3202 Clinical Sciences; 42 Health Sciences; 4203 Health Services and Systems; 4205 Nursing; 4206 Public Health
10.1371/journal.pmed.1003010	32 Biomedical and Clinical Sciences; 42 Health Sciences
10.1371/journal.pmed.1003006	32 Biomedical and Clinical Sciences; 3211 Oncology and Carcinogenesis; 42 Health Sciences; 4203 Health Services and Systems
10.1371/journal.pmed.1003002	32 Biomedical and Clinical Sciences
10.1371/journal.pmed.1002987	32 Biomedical and Clinical Sciences; 3202 Clinical Sciences
10.1371/journal.pgen.1008509	31 Biological Sciences; 3105 Genetics
10.1371/journal.ppat.1008249	32 Biomedical and Clinical Sciences; 3204 Immunology; 3207 Medical Microbiology
10.1371/journal.ppat.1008216	31 Biological Sciences; 3107 Microbiology; 32 Biomedical and Clinical Sciences; 3202 Clinical Sciences; 3207 Medical Microbiology
10.1371/journal.ppat.1008115	31 Biological Sciences; 3107 Microbiology; 32 Biomedical and Clinical Sciences; 3204 Immunology; 3207 Medical Microbiology
10.1371/journal.pone.0227336	35 Commerce, Management, Tourism and Services; 3505 Human Resources and Industrial Relations; 44 Human Society
10.1371/journal.pone.0227313	32 Biomedical and Clinical Sciences; 3202 Clinical Sciences; 42 Health Sciences; 4201 Allied Health and Rehabilitation Science; 4207 Sports Science and Exercise
10.1371/journal.pone.0227305	32 Biomedical and Clinical Sciences; 3202 Clinical Sciences; 3211 Oncology and Carcinogenesis
10.1371/journal.pone.0227278	31 Biological Sciences; 3101 Biochemistry and Cell Biology
10.1371/journal.pone.0227248	32 Biomedical and Clinical Sciences; 3202 Clinical Sciences
10.1371/journal.pone.0227229	44 Human Society; 52 Psychology; 5205 Social and Personality Psychology
10.1371/journal.pone.0227228	30 Agricultural, Veterinary and Food Sciences; 3004 Crop and Pasture Production; 31 Biological Sciences; 3108 Plant Biology; 41 Environmental Sciences; 4103 Environmental Biotechnology
10.1371/journal.pone.0227221	32 Biomedical and Clinical Sciences; 3202 Clinical Sciences
10.1371/journal.pone.0227186	32 Biomedical and Clinical Sciences; 42 Health Sciences; 4203 Health Services and Systems; 4206 Public Health
10.1371/journal.pone.0227142	32 Biomedical and Clinical Sciences; 3214 Pharmacology and Pharmaceutical Sciences
10.1371/journal.pone.0227141	32 Biomedical and Clinical Sciences; 3202 Clinical Sciences
10.1371/journal.pone.0227131	32 Biomedical and Clinical Sciences; 3202 Clinical Sciences; 42 Health Sciences; 4203 Health Services and Systems
10.1371/journal.pone.0227122	32 Biomedical and Clinical Sciences; 43 History, Heritage and Archaeology; 4303 Historical Studies
10.1371/journal.pone.0227120	32 Biomedical and Clinical Sciences; 3215 Reproductive Medicine; 42 Health Sciences; 4204 Midwifery
10.1371/journal.pone.0227119	42 Health Sciences; 4207 Sports Science and Exercise
10.1371/journal.pone.0227113	52 Psychology; 5201 Applied and Developmental Psychology; 5203 Clinical and Health Psychology
10.1371/journal.pone.0227110	31 Biological Sciences; 3102 Bioinformatics and Computational Biology
10.1371/journal.pone.0227095	30 Agricultural, Veterinary and Food Sciences; 32 Biomedical and Clinical Sciences; 3215 Reproductive Medicine
10.1371/journal.pone.0227092	31 Biological Sciences; 3103 Ecology; 3109 Zoology; 41 Environmental Sciences
10.1371/journal.pone.0227091	42 Health Sciences; 4202 Epidemiology
10.1371/journal.pone.0227078	32 Biomedical and Clinical Sciences; 3212 Ophthalmology and Optometry
10.1371/journal.pone.0227071	31 Biological Sciences; 3107 Microbiology; 32 Biomedical and Clinical Sciences; 3202 Clinical Sciences
10.1371/journal.pone.0227070	31 Biological Sciences; 3107 Microbiology; 32 Biomedical and Clinical Sciences
10.1371/journal.pone.0227063	32 Biomedical and Clinical Sciences; 3215 Reproductive Medicine; 42 Health Sciences; 4206 Public Health
10.1371/journal.pone.0227048	32 Biomedical and Clinical Sciences; 3212 Ophthalmology and Optometry
10.1371/journal.pone.0227033	31 Biological Sciences; 3101 Biochemistry and Cell Biology
10.1371/journal.pone.0227028	31 Biological Sciences; 3103 Ecology; 41 Environmental Sciences; 4102 Ecological Applications; 4104 Environmental Management
10.1371/journal.pone.0227020	30 Agricultural, Veterinary and Food Sciences; 3004 Crop and Pasture Production; 31 Biological Sciences; 3102 Bioinformatics and Computational Biology; 3105 Genetics; 3108 Plant Biology
10.1371/journal.pone.0227009	31 Biological Sciences; 3107 Microbiology; 32 Biomedical and Clinical Sciences; 3202 Clinical Sciences; 3211 Oncology and Carcinogenesis
10.1371/journal.pone.0227005	31 Biological Sciences; 3107 Microbiology; 32 Biomedical and Clinical Sciences
10.1371/journal.pone.0226996	40 Engineering; 4003 Biomedical Engineering
10.1371/journal.pone.0226973	32 Biomedical and Clinical Sciences; 3202 Clinical Sciences; 42 Health Sciences
10.1371/journal.pone.0226970	31 Biological Sciences; 3103 Ecology; 37 Earth Sciences
10.1371/journal.pone.0226969	32 Biomedical and Clinical Sciences; 3215 Reproductive Medicine
10.1371/journal.pone.0226967	44 Human Society; 4405 Gender Studies; 52 Psychology; 5205 Social and Personality Psychology
10.1371/journal.pone.0226959	31 Biological Sciences; 3107 Microbiology; 32 Biomedical and Clinical Sciences; 3202 Clinical Sciences; 3205 Medical Biochemistry and Metabolomics; 34 Chemical Sciences; 3401 Analytical Chemistry
10.1371/journal.pone.0226939	42 Health Sciences; 4201 Allied Health and Rehabilitation Science; 4207 Sports Science and Exercise
10.1371/journal.pone.0226925	42 Health Sciences; 4203 Health Services and Systems
10.1371/journal.pone.0226922	32 Biomedical and Clinical Sciences; 3202 Clinical Sciences; 3207 Medical Microbiology
10.1371/journal.pone.0226916	42 Health Sciences; 4203 Health Services and Systems; 4205 Nursing; 44 Human Society; 4409 Social Work
10.1371/journal.pone.0226890	32 Biomedical and Clinical Sciences; 3202 Clinical Sciences
10.1371/journal.pone.0226882	32 Biomedical and Clinical Sciences; 3202 Clinical Sciences
10.1371/journal.pone.0226857	31 Biological Sciences; 3107 Microbiology; 32 Biomedical and Clinical Sciences; 3202 Clinical Sciences
10.1371/journal.pone.0226855	34 Chemical Sciences; 41 Environmental Sciences; 4105 Pollution and Contamination
10.1371/journal.pone.0226851	30 Agricultural, Veterinary and Food Sciences; 3009 Veterinary Sciences
10.1371/journal.pone.0226845	31 Biological Sciences; 3108 Plant Biology; 40 Engineering
10.1371/journal.pone.0226841	37 Earth Sciences; 3704 Geoinformatics
10.1371/journal.pone.0226835	31 Biological Sciences; 3107 Microbiology; 32 Biomedical and Clinical Sciences
10.1371/journal.pone.0226834	30 Agricultural, Veterinary and Food Sciences; 3006 Food Sciences; 40 Engineering; 4004 Chemical Engineering
10.1371/journal.pone.0226815	31 Biological Sciences; 32 Biomedical and Clinical Sciences; 3207 Medical Microbiology
10.1371/journal.pone.0226802	52 Psychology; 5205 Social and Personality Psychology
10.1371/journal.pone.0226781	30 Agricultural, Veterinary and Food Sciences; 3009 Veterinary Sciences
10.1371/journal.pone.0226780	30 Agricultural, Veterinary and Food Sciences; 3009 Veterinary Sciences; 31 Biological Sciences; 3107 Microbiology
10.1371/journal.pone.0226752	31 Biological Sciences; 3102 Bioinformatics and Computational Biology; 3105 Genetics; 32 Biomedical and Clinical Sciences; 3205 Medical Biochemistry and Metabolomics
10.1371/journal.pone.0226751	40 Engineering; 46 Information and Computing Sciences; 4602 Artificial Intelligence; 4605 Data Management and Data Science
10.1371/journal.pone.0226729	52 Psychology; 5201 Applied and Developmental Psychology; 5202 Biological Psychology
10.1371/journal.pone.0226716	39 Education; 52 Psychology; 5203 Clinical and Health Psychology; 5205 Social and Personality Psychology
10.1371/journal.pone.0226683	32 Biomedical and Clinical Sciences; 3202 Clinical Sciences; 42 Health Sciences; 4206 Public Health
10.1371/journal.pone.0226682	31 Biological Sciences; 3107 Microbiology; 32 Biomedical and Clinical Sciences
10.1371/journal.pone.0226636	34 Chemical Sciences; 3402 Inorganic Chemistry
10.1371/journal.pone.0226629	32 Biomedical and Clinical Sciences; 3212 Ophthalmology and Optometry
10.1371/journal.pone.0226575	31 Biological Sciences; 3105 Genetics; 32 Biomedical and Clinical Sciences; 3202 Clinical Sciences; 3209 Neurosciences
10.1371/journal.pone.0226511	32 Biomedical and Clinical Sciences; 42 Health Sciences; 4203 Health Services and Systems
10.1371/journal.pone.0226496	32 Biomedical and Clinical Sciences; 3213 Paediatrics
10.1371/journal.pone.0226442	32 Biomedical and Clinical Sciences; 3202 Clinical Sciences; 3209 Neurosciences
10.1371/journal.pone.0226438	31 Biological Sciences; 3109 Zoology; 52 Psychology; 5202 Biological Psychology
10.1371/journal.pone.0226300	30 Agricultural, Veterinary and Food Sciences; 3009 Veterinary Sciences
10.1371/journal.pone.0226281	46 Information and Computing Sciences; 4612 Software Engineering
10.1371/journal.pone.0226245	31 Biological Sciences; 3101 Biochemistry and Cell Biology; 32 Biomedical and Clinical Sciences; 3206 Medical Biotechnology
10.1371/journal.pone.0226144	32 Biomedical and Clinical Sciences; 42 Health Sciences; 4204 Midwifery
10.1371/journal.pone.0226063	31 Biological Sciences; 3103 Ecology; 51 Physical Sciences
10.1371/journal.pone.0225552	41 Environmental Sciences; 4104 Environmental Management
10.1371/journal.pone.0223243	30 Agricultural, Veterinary and Food Sciences; 3009 Veterinary Sciences
10.1371/journal.pone.0221691	32 Biomedical and Clinical Sciences; 3213 Paediatrics; 3215 Reproductive Medicine; 42 Health Sciences; 4206 Public Health
10.1371/journal.pone.0219333	42 Health Sciences; 4201 Allied Health and Rehabilitation Science; 4207 Sports Science and Exercise
10.1371/journal.pone.0219236	31 Biological Sciences; 3103 Ecology; 41 Environmental Sciences; 4102 Ecological Applications; 4104 Environmental Management
10.1371/journal.pone.0216515	31 Biological Sciences; 3105 Genetics; 32 Biomedical and Clinical Sciences
10.1371/journal.pone.0215042	32 Biomedical and Clinical Sciences; 42 Health Sciences; 4206 Public Health
10.1371/journal.pntd.0007985	32 Biomedical and Clinical Sciences; 3207 Medical Microbiology
10.1371/journal.pmed.1003009	32 Biomedical and Clinical Sciences; 3215 Reproductive Medicine; 42 Health Sciences; 4204 Midwifery
10.1371/journal.pmed.1003007	32 Biomedical and Clinical Sciences; 3210 Nutrition and Dietetics; 42 Health Sciences; 4206 Public Health
10.1371/journal.pmed.1003005	32 Biomedical and Clinical Sciences; 3202 Clinical Sciences
10.1371/journal.pmed.1003001	32 Biomedical and Clinical Sciences; 3215 Reproductive Medicine
10.1371/journal.pgen.1008492	31 Biological Sciences; 3105 Genetics; 3108 Plant Biology
10.1371/journal.ppat.1008221	31 Biological Sciences; 32 Biomedical and Clinical Sciences; 3206 Medical Biotechnology
10.1371/journal.pone.0227220	40 Engineering; 4004 Chemical Engineering
10.1371/journal.pone.0227153	40 Engineering; 4008 Electrical Engineering; 4009 Electronics, Sensors and Digital Hardware
10.1371/journal.pone.0227144	32 Biomedical and Clinical Sciences; 35 Commerce, Management, Tourism and Services; 3504 Commercial Services; 42 Health Sciences
10.1371/journal.pone.0227133	32 Biomedical and Clinical Sciences; 3202 Clinical Sciences
10.1371/journal.pone.0227109	31 Biological Sciences; 3107 Microbiology; 32 Biomedical and Clinical Sciences; 3202 Clinical Sciences; 3204 Immunology; 3207 Medical Microbiology
10.1371/journal.pone.0227107	31 Biological Sciences; 32 Biomedical and Clinical Sciences; 3202 Clinical Sciences
10.1371/journal.pone.0227035	32 Biomedical and Clinical Sciences; 3210 Nutrition and Dietetics; 42 Health Sciences; 4206 Public Health
10.1371/journal.pone.0226992	32 Biomedical and Clinical Sciences; 3215 Reproductive Medicine; 42 Health Sciences; 4206 Public Health
10.1371/journal.pone.0226989	32 Biomedical and Clinical Sciences; 3202 Clinical Sciences; 42 Health Sciences; 4207 Sports Science and Exercise
10.1371/journal.pone.0226957	32 Biomedical and Clinical Sciences; 3202 Clinical Sciences; 42 Health Sciences
10.1371/journal.pone.0226952	31 Biological Sciences; 3107 Microbiology; 32 Biomedical and Clinical Sciences; 3202 Clinical Sciences; 3207 Medical Microbiology
10.1371/journal.pone.0226949	31 Biological Sciences; 3104 Evolutionary Biology; 3105 Genetics
10.1371/journal.pone.0226911	39 Education; 42 Health Sciences; 4206 Public Health
10.1371/journal.pone.0226908	32 Biomedical and Clinical Sciences; 3202 Clinical Sciences; 42 Health Sciences
10.1371/journal.pone.0226906	32 Biomedical and Clinical Sciences; 3202 Clinical Sciences; 42 Health Sciences
10.1371/journal.pone.0226903	30 Agricultural, Veterinary and Food Sciences; 3003 Animal Production
10.1371/journal.pone.0226868	42 Health Sciences; 4203 Health Services and Systems; 46 Information and Computing Sciences
10.1371/journal.pone.0226832	52 Psychology; 5201 Applied and Developmental Psychology; 5202 Biological Psychology; 5204 Cognitive and Computational Psychology
10.1371/journal.pone.0226831	42 Health Sciences; 4206 Public Health
10.1371/journal.pone.0226820	32 Biomedical and Clinical Sciences; 3209 Neurosciences; 3214 Pharmacology and Pharmaceutical Sciences; 52 Psychology; 5202 Biological Psychology
10.1371/journal.pone.0226765	32 Biomedical and Clinical Sciences; 3211 Oncology and Carcinogenesis; 42 Health Sciences; 4203 Health Services and Systems
10.1371/journal.pone.0226738	44 Human Society; 4404 Development Studies
10.1371/journal.pone.0226719	30 Agricultural, Veterinary and Food Sciences; 3001 Agricultural Biotechnology
10.1371/journal.pone.0226680	34 Chemical Sciences; 3404 Medicinal and Biomolecular Chemistry; 46 Information and Computing Sciences; 4613 Theory Of Computation; 49 Mathematical Sciences; 4901 Applied Mathematics
10.1371/journal.pone.0226666	31 Biological Sciences; 3103 Ecology; 41 Environmental Sciences; 4102 Ecological Applications
10.1371/journal.pone.0226522	32 Biomedical and Clinical Sciences; 3215 Reproductive Medicine; 48 Law and Legal Studies
10.1371/journal.pone.0226517	31 Biological Sciences; 32 Biomedical and Clinical Sciences; 3202 Clinical Sciences
10.1371/journal.pone.0226507	32 Biomedical and Clinical Sciences; 3202 Clinical Sciences
10.1371/journal.pone.0226497	31 Biological Sciences; 3103 Ecology; 3105 Genetics; 3107 Microbiology
10.1371/journal.pone.0226421	40 Engineering; 4003 Biomedical Engineering
10.1371/journal.pone.0226295	32 Biomedical and Clinical Sciences; 3202 Clinical Sciences
10.1371/journal.pone.0226288	32 Biomedical and Clinical Sciences; 3202 Clinical Sciences; 42 Health Sciences; 4201 Allied Health and Rehabilitation Science
10.1371/journal.pone.0226278	41 Environmental Sciences; 4102 Ecological Applications; 4105 Pollution and Contamination
10.1371/journal.pone.0226240	31 Biological Sciences; 3107 Microbiology
10.1371/journal.pone.0226228	31 Biological Sciences; 3105 Genetics; 32 Biomedical and Clinical Sciences; 42 Health Sciences; 4202 Epidemiology
10.1371/journal.pone.0226220	32 Biomedical and Clinical Sciences; 42 Health Sciences; 4206 Public Health
10.1371/journal.pone.0225877	32 Biomedical and Clinical Sciences; 3202 Clinical Sciences; 42 Health Sciences; 4206 Public Health
10.1371/journal.pone.0225854	44 Human Society; 4402 Criminology; 48 Law and Legal Studies; 4805 Legal Systems
10.1371/journal.pone.0225641	42 Health Sciences; 46 Information and Computing Sciences; 4610 Library and Information Studies
10.1371/journal.pone.0225531	32 Biomedical and Clinical Sciences; 3214 Pharmacology and Pharmaceutical Sciences
10.1371/journal.pone.0225208	30 Agricultural, Veterinary and Food Sciences; 3006 Food Sciences; 40 Engineering; 4004 Chemical Engineering
10.1371/journal.pone.0225112	32 Biomedical and Clinical Sciences; 3202 Clinical Sciences
10.1371/journal.pone.0225083	30 Agricultural, Veterinary and Food Sciences; 3009 Veterinary Sciences; 32 Biomedical and Clinical Sciences; 3202 Clinical Sciences
10.1371/journal.pone.0220483	31 Biological Sciences; 3107 Microbiology; 32 Biomedical and Clinical Sciences; 3202 Clinical Sciences
10.1371/journal.pone.0219724	32 Biomedical and Clinical Sciences; 3211 Oncology and Carcinogenesis
10.1371/journal.pone.0217327	32 Biomedical and Clinical Sciences; 3202 Clinical Sciences; 42 Health Sciences; 4201 Allied Health and Rehabilitation Science
10.1371/journal.pone.0213120	30 Agricultural, Veterinary and Food Sciences; 44 Human Society; 4406 Human Geography
10.1371/journal.pntd.0007932	31 Biological Sciences; 3102 Bioinformatics and Computational Biology
10.1371/journal.pgen.1008501	31 Biological Sciences; 3105 Genetics
10.1371/journal.pcbi.1007563	32 Biomedical and Clinical Sciences; 3202 Clinical Sciences
10.1371/journal.ppat.1008239	32 Biomedical and Clinical Sciences; 3204 Immunology; 3207 Medical Microbiology
10.1371/journal.ppat.1008101	31 Biological Sciences; 3101 Biochemistry and Cell Biology; 3107 Microbiology; 32 Biomedical and Clinical Sciences; 3207 Medical Microbiology
10.1371/journal.pone.0227225	31 Biological Sciences; 3102 Bioinformatics and Computational Biology
10.1371/journal.pone.0227132	32 Biomedical and Clinical Sciences; 3202 Clinical Sciences; 42 Health Sciences
10.1371/journal.pone.0227101	32 Biomedical and Clinical Sciences; 3202 Clinical Sciences
10.1371/journal.pone.0227097	32 Biomedical and Clinical Sciences; 3208 Medical Physiology
10.1371/journal.pone.0227080	31 Biological Sciences; 3107 Microbiology; 32 Biomedical and Clinical Sciences; 3202 Clinical Sciences
10.1371/journal.pone.0227079	30 Agricultural, Veterinary and Food Sciences; 3004 Crop and Pasture Production; 3008 Horticultural Production
10.1371/journal.pone.0227075	42 Health Sciences; 4207 Sports Science and Exercise
10.1371/journal.pone.0227057	32 Biomedical and Clinical Sciences; 3202 Clinical Sciences; 3209 Neurosciences; 42 Health Sciences; 4201 Allied Health and Rehabilitation Science
10.1371/journal.pone.0226995	31 Biological Sciences; 3103 Ecology; 3108 Plant Biology; 41 Environmental Sciences
10.1371/journal.pone.0226982	52 Psychology; 5202 Biological Psychology; 5204 Cognitive and Computational Psychology
10.1371/journal.pone.0226960	32 Biomedical and Clinical Sciences; 3212 Ophthalmology and Optometry
10.1371/journal.pone.0226955	30 Agricultural, Veterinary and Food Sciences; 31 Biological Sciences; 3109 Zoology
10.1371/journal.pone.0226945	37 Earth Sciences; 3701 Atmospheric Sciences
10.1371/journal.pone.0226941	30 Agricultural, Veterinary and Food Sciences; 3009 Veterinary Sciences
10.1371/journal.pone.0226919	32 Biomedical and Clinical Sciences; 3202 Clinical Sciences; 42 Health Sciences
10.1371/journal.pone.0226910	32 Biomedical and Clinical Sciences; 3207 Medical Microbiology
10.1371/journal.pone.0226909	30 Agricultural, Veterinary and Food Sciences; 3007 Forestry Sciences
10.1371/journal.pone.0226869	32 Biomedical and Clinical Sciences; 3204 Immunology; 3211 Oncology and Carcinogenesis
10.1371/journal.pone.0226778	31 Biological Sciences; 3107 Microbiology; 32 Biomedical and Clinical Sciences; 3207 Medical Microbiology
10.1371/journal.pone.0226769	30 Agricultural, Veterinary and Food Sciences; 32 Biomedical and Clinical Sciences; 3206 Medical Biotechnology
10.1371/journal.pone.0226762	30 Agricultural, Veterinary and Food Sciences; 3009 Veterinary Sciences; 32 Biomedical and Clinical Sciences
10.1371/journal.pone.0226742	42 Health Sciences; 4203 Health Services and Systems; 4205 Nursing
10.1371/journal.pone.0226714	31 Biological Sciences; 3105 Genetics; 32 Biomedical and Clinical Sciences; 3211 Oncology and Carcinogenesis
10.1371/journal.pone.0226694	31 Biological Sciences; 3105 Genetics
10.1371/journal.pone.0226692	32 Biomedical and Clinical Sciences; 46 Information and Computing Sciences; 4608 Human-Centred Computing
10.1371/journal.pone.0226687	31 Biological Sciences; 49 Mathematical Sciences; 4905 Statistics
10.1371/journal.pone.0226626	32 Biomedical and Clinical Sciences; 3202 Clinical Sciences; 3209 Neurosciences
10.1371/journal.pone.0226620	31 Biological Sciences; 32 Biomedical and Clinical Sciences; 3211 Oncology and Carcinogenesis
10.1371/journal.pone.0226619	30 Agricultural, Veterinary and Food Sciences; 3004 Crop and Pasture Production
10.1371/journal.pone.0226609	32 Biomedical and Clinical Sciences; 3202 Clinical Sciences
10.1371/journal.pone.0226577	31 Biological Sciences; 3101 Biochemistry and Cell Biology
10.1371/journal.pone.0226574	31 Biological Sciences; 3107 Microbiology; 32 Biomedical and Clinical Sciences; 3202 Clinical Sciences
10.1371/journal.pone.0226553	32 Biomedical and Clinical Sciences; 3211 Oncology and Carcinogenesis
10.1371/journal.pone.0226512	32 Biomedical and Clinical Sciences; 3201 Cardiovascular Medicine and Haematology; 3202 Clinical Sciences; 40 Engineering; 4003 Biomedical Engineering
10.1371/journal.pone.0226408	35 Commerce, Management, Tourism and Services; 47 Language, Communication and Culture; 4704 Linguistics
10.1371/journal.pone.0226339	32 Biomedical and Clinical Sciences; 3215 Reproductive Medicine; 42 Health Sciences; 4204 Midwifery; 4206 Public Health
10.1371/journal.pone.0226327	31 Biological Sciences; 3101 Biochemistry and Cell Biology
10.1371/journal.pone.0226321	32 Biomedical and Clinical Sciences; 3202 Clinical Sciences
10.1371/journal.pone.0226246	30 Agricultural, Veterinary and Food Sciences; 3009 Veterinary Sciences
10.1371/journal.pone.0226241	32 Biomedical and Clinical Sciences; 42 Health Sciences; 4206 Public Health
10.1371/journal.pone.0226236	32 Biomedical and Clinical Sciences; 3208 Medical Physiology; 40 Engineering; 4003 Biomedical Engineering; 46 Information and Computing Sciences
10.1371/journal.pone.0226139	30 Agricultural, Veterinary and Food Sciences; 41 Environmental Sciences; 4103 Environmental Biotechnology
10.1371/journal.pone.0226074	32 Biomedical and Clinical Sciences; 3215 Reproductive Medicine; 42 Health Sciences; 4203 Health Services and Systems; 44 Human Society
10.1371/journal.pone.0226020	32 Biomedical and Clinical Sciences; 3202 Clinical Sciences
10.1371/journal.pone.0225698	31 Biological Sciences; 3103 Ecology; 3109 Zoology; 41 Environmental Sciences; 4104 Environmental Management
10.1371/journal.pone.0225101	32 Biomedical and Clinical Sciences; 3210 Nutrition and Dietetics; 42 Health Sciences; 4206 Public Health
10.1371/journal.pone.0224996	40 Engineering; 4003 Biomedical Engineering; 4007 Control Engineering, Mechatronics and Robotics
10.1371/journal.pone.0224949	30 Agricultural, Veterinary and Food Sciences; 3003 Animal Production; 31 Biological Sciences
10.1371/journal.pone.0222050	32 Biomedical and Clinical Sciences; 3202 Clinical Sciences; 3211 Oncology and Carcinogenesis
10.1371/journal.pone.0221745	30 Agricultural, Veterinary and Food Sciences; 3005 Fisheries Sciences; 31 Biological Sciences
10.1371/journal.pone.0221137	32 Biomedical and Clinical Sciences; 3203 Dentistry
10.1371/journal.pone.0220679	30 Agricultural, Veterinary and Food Sciences; 31 Biological Sciences; 3103 Ecology; 3107 Microbiology
10.1371/journal.pone.0216513	30 Agricultural, Veterinary and Food Sciences; 3001 Agricultural Biotechnology
10.1371/journal.pone.0214778	30 Agricultural, Veterinary and Food Sciences; 3003 Animal Production
10.1371/journal.pntd.0007990	31 Biological Sciences; 32 Biomedical and Clinical Sciences; 3207 Medical Microbiology
10.1371/journal.pntd.0007988	32 Biomedical and Clinical Sciences; 3202 Clinical Sciences; 3207 Medical Microbiology
10.1371/journal.pntd.0007978	32 Biomedical and Clinical Sciences; 3202 Clinical Sciences
10.1371/journal.pntd.0007974	32 Biomedical and Clinical Sciences; 3202 Clinical Sciences
10.1371/journal.pntd.0007968	32 Biomedical and Clinical Sciences; 3207 Medical Microbiology
10.1371/journal.pntd.0007955	32 Biomedical and Clinical Sciences; 3202 Clinical Sciences; 3207 Medical Microbiology
10.1371/journal.pntd.0007884	31 Biological Sciences; 32 Biomedical and Clinical Sciences; 3207 Medical Microbiology
10.1371/journal.pmed.1002999	32 Biomedical and Clinical Sciences; 42 Health Sciences; 4202 Epidemiology
10.1371/journal.pgen.1008573	31 Biological Sciences; 3101 Biochemistry and Cell Biology
10.1371/journal.pgen.1008554	31 Biological Sciences; 3101 Biochemistry and Cell Biology
10.1371/journal.pgen.1008468	31 Biological Sciences; 3105 Genetics
10.1371/journal.pcbi.1007589	32 Biomedical and Clinical Sciences; 3202 Clinical Sciences; 3207 Medical Microbiology
10.1371/journal.pcbi.1007540	34 Chemical Sciences; 3404 Medicinal and Biomolecular Chemistry
10.1371/journal.pcbi.1007351	31 Biological Sciences; 3102 Bioinformatics and Computational Biology; 40 Engineering
10.1371/journal.pbio.3000559	31 Biological Sciences; 3101 Biochemistry and Cell Biology; 32 Biomedical and Clinical Sciences; 3215 Reproductive Medicine
10.1371/journal.pone.0226485	31 Biological Sciences; 3102 Bioinformatics and Computational Biology; 3105 Genetics
10.1371/journal.pone.0227010	32 Biomedical and Clinical Sciences; 3215 Reproductive Medicine; 42 Health Sciences; 4204 Midwifery; 4206 Public Health
10.1371/journal.pone.0226556	31 Biological Sciences; 3105 Genetics; 3108 Plant Biology
10.1371/journal.pone.0226671	32 Biomedical and Clinical Sciences; 3202 Clinical Sciences; 42 Health Sciences
10.1371/journal.pgen.1008557	31 Biological Sciences; 3101 Biochemistry and Cell Biology
10.1371/journal.pone.0226602	32 Biomedical and Clinical Sciences; 3209 Neurosciences
10.1371/journal.pone.0226547	31 Biological Sciences; 3103 Ecology; 41 Environmental Sciences; 4102 Ecological Applications
10.1371/journal.pone.0226525	47 Language, Communication and Culture; 4704 Linguistics; 52 Psychology; 5202 Biological Psychology
10.1371/journal.pone.0226676	31 Biological Sciences; 3107 Microbiology; 32 Biomedical and Clinical Sciences; 3202 Clinical Sciences; 3207 Medical Microbiology
10.1371/journal.pone.0226038	32 Biomedical and Clinical Sciences; 3202 Clinical Sciences
10.1371/journal.pone.0226739	42 Health Sciences; 4201 Allied Health and Rehabilitation Science
10.1371/journal.pone.0226756	32 Biomedical and Clinical Sciences; 42 Health Sciences; 4206 Public Health
10.1371/journal.pone.0226776	30 Agricultural, Veterinary and Food Sciences; 3001 Agricultural Biotechnology; 3004 Crop and Pasture Production
10.1371/journal.pone.0226886	31 Biological Sciences; 3103 Ecology; 3109 Zoology
10.1371/journal.pone.0226728	32 Biomedical and Clinical Sciences; 3212 Ophthalmology and Optometry
10.1371/journal.pgen.1008548	31 Biological Sciences; 3101 Biochemistry and Cell Biology
10.1371/journal.pone.0226542	30 Agricultural, Veterinary and Food Sciences; 3004 Crop and Pasture Production; 31 Biological Sciences; 3108 Plant Biology
10.1371/journal.pone.0226343	32 Biomedical and Clinical Sciences; 3204 Immunology; 3207 Medical Microbiology
10.1371/journal.pone.0226583	32 Biomedical and Clinical Sciences; 3202 Clinical Sciences
10.1371/journal.pone.0226849	31 Biological Sciences; 3103 Ecology; 3107 Microbiology; 3108 Plant Biology
10.1371/journal.pntd.0007934	31 Biological Sciences; 3107 Microbiology; 32 Biomedical and Clinical Sciences; 3207 Medical Microbiology
10.1371/journal.pcbi.1006941	31 Biological Sciences; 3101 Biochemistry and Cell Biology; 46 Information and Computing Sciences
10.1371/journal.pone.0225250	30 Agricultural, Veterinary and Food Sciences; 3009 Veterinary Sciences; 31 Biological Sciences
10.1371/journal.ppat.1008001	31 Biological Sciences; 32 Biomedical and Clinical Sciences; 3207 Medical Microbiology
10.1371/journal.pone.0226576	31 Biological Sciences; 40 Engineering; 4004 Chemical Engineering
10.1371/journal.pone.0226489	32 Biomedical and Clinical Sciences; 3202 Clinical Sciences; 42 Health Sciences; 4203 Health Services and Systems; 4206 Public Health; 44 Human Society; 4407 Policy and Administration
10.1371/journal.ppat.1008168	32 Biomedical and Clinical Sciences; 3207 Medical Microbiology
10.1371/journal.pone.0225182	48 Law and Legal Studies; 4804 Law In Context; 52 Psychology; 5201 Applied and Developmental Psychology; 5205 Social and Personality Psychology
10.1371/journal.pone.0226618	31 Biological Sciences; 3101 Biochemistry and Cell Biology
10.1371/journal.pone.0227031	32 Biomedical and Clinical Sciences; 3202 Clinical Sciences; 3211 Oncology and Carcinogenesis
10.1371/journal.pone.0226753	31 Biological Sciences; 32 Biomedical and Clinical Sciences; 3214 Pharmacology and Pharmaceutical Sciences; 52 Psychology; 5202 Biological Psychology
10.1371/journal.pone.0226713	52 Psychology; 5205 Social and Personality Psychology
10.1371/journal.pgen.1008532	31 Biological Sciences; 3101 Biochemistry and Cell Biology; 3105 Genetics
10.1371/journal.pcbi.1007539	31 Biological Sciences; 3101 Biochemistry and Cell Biology
10.1371/journal.pone.0227074	30 Agricultural, Veterinary and Food Sciences; 3002 Agriculture, Land and Farm Management; 3004 Crop and Pasture Production; 44 Human Society
10.1371/journal.pone.0226064	31 Biological Sciences; 3103 Ecology; 3104 Evolutionary Biology; 3105 Genetics
10.1371/journal.pone.0226730	32 Biomedical and Clinical Sciences; 42 Health Sciences; 4203 Health Services and Systems
10.1371/journal.pntd.0007834	32 Biomedical and Clinical Sciences; 3202 Clinical Sciences; 3207 Medical Microbiology
10.1371/journal.pone.0226764	30 Agricultural, Veterinary and Food Sciences; 3009 Veterinary Sciences
10.1371/journal.pone.0226775	42 Health Sciences; 4207 Sports Science and Exercise; 52 Psychology; 5202 Biological Psychology
10.1371/journal.pone.0226768	31 Biological Sciences; 3101 Biochemistry and Cell Biology
10.1371/journal.pone.0227007	42 Health Sciences; 4206 Public Health
10.1371/journal.pone.0226850	31 Biological Sciences; 3103 Ecology
10.1371/journal.pntd.0007887	31 Biological Sciences; 3105 Genetics
10.1371/journal.pone.0226191	30 Agricultural, Veterinary and Food Sciences; 32 Biomedical and Clinical Sciences; 3207 Medical Microbiology
10.1371/journal.pone.0226866	32 Biomedical and Clinical Sciences; 3202 Clinical Sciences
10.1371/journal.pone.0225622	32 Biomedical and Clinical Sciences; 3204 Immunology; 3207 Medical Microbiology
10.1371/journal.pone.0225607	32 Biomedical and Clinical Sciences; 3202 Clinical Sciences
10.1371/journal.pone.0226748	32 Biomedical and Clinical Sciences; 40 Engineering; 4003 Biomedical Engineering
10.1371/journal.pmed.1002994	42 Health Sciences; 4206 Public Health
10.1371/journal.pone.0224610	32 Biomedical and Clinical Sciences; 3202 Clinical Sciences; 3207 Medical Microbiology
10.1371/journal.ppat.1008248	32 Biomedical and Clinical Sciences; 3202 Clinical Sciences; 3204 Immunology; 3207 Medical Microbiology
10.1371/journal.pone.0226359	42 Health Sciences; 4203 Health Services and Systems; 4205 Nursing; 44 Human Society; 4409 Social Work
10.1371/journal.pone.0226366	37 Earth Sciences; 3708 Oceanography; 40 Engineering; 4012 Fluid Mechanics and Thermal Engineering
10.1371/journal.pone.0226669	30 Agricultural, Veterinary and Food Sciences; 3003 Animal Production; 31 Biological Sciences; 3109 Zoology
10.1371/journal.pone.0226114	31 Biological Sciences; 3103 Ecology
10.1371/journal.pgen.1008528	31 Biological Sciences; 3105 Genetics
10.1371/journal.pone.0226607	32 Biomedical and Clinical Sciences; 3202 Clinical Sciences
10.1371/journal.pcbi.1007541	34 Chemical Sciences; 3404 Medicinal and Biomolecular Chemistry; 46 Information and Computing Sciences; 4613 Theory Of Computation
10.1371/journal.pone.0226224	37 Earth Sciences; 40 Engineering; 4013 Geomatic Engineering
10.1371/journal.pone.0225814	42 Health Sciences; 4203 Health Services and Systems; 4204 Midwifery; 4205 Nursing
10.1371/journal.pone.0226477	32 Biomedical and Clinical Sciences; 3202 Clinical Sciences
10.1371/journal.pone.0226435	32 Biomedical and Clinical Sciences; 3206 Medical Biotechnology
10.1371/journal.pone.0226415	31 Biological Sciences; 3101 Biochemistry and Cell Biology
10.1371/journal.pcbi.1007519	31 Biological Sciences; 3101 Biochemistry and Cell Biology
10.1371/journal.pcbi.1007171	31 Biological Sciences; 3101 Biochemistry and Cell Biology; 32 Biomedical and Clinical Sciences
10.1371/journal.pone.0226492	31 Biological Sciences; 41 Environmental Sciences; 4102 Ecological Applications; 4104 Environmental Management
10.1371/journal.pone.0225932	42 Health Sciences; 4203 Health Services and Systems; 4206 Public Health; 52 Psychology; 5203 Clinical and Health Psychology
10.1371/journal.pone.0225415	32 Biomedical and Clinical Sciences; 3204 Immunology; 3207 Medical Microbiology
10.1371/journal.pone.0226985	31 Biological Sciences; 3103 Ecology; 3105 Genetics; 3108 Plant Biology
10.1371/journal.pmed.1002989	32 Biomedical and Clinical Sciences; 3211 Oncology and Carcinogenesis
10.1371/journal.pone.0222780	30 Agricultural, Veterinary and Food Sciences; 3005 Fisheries Sciences
10.1371/journal.pone.0226482	52 Psychology; 5202 Biological Psychology; 5204 Cognitive and Computational Psychology
10.1371/journal.pone.0226552	32 Biomedical and Clinical Sciences; 3202 Clinical Sciences; 3211 Oncology and Carcinogenesis; 3214 Pharmacology and Pharmaceutical Sciences
10.1371/journal.pone.0226047	52 Psychology; 5205 Social and Personality Psychology
10.1371/journal.pone.0226424	52 Psychology; 5201 Applied and Developmental Psychology; 5202 Biological Psychology
10.1371/journal.pone.0226805	46 Information and Computing Sciences; 4608 Human-Centred Computing; 52 Psychology; 5205 Social and Personality Psychology
10.1371/journal.pone.0226783	30 Agricultural, Veterinary and Food Sciences; 3008 Horticultural Production; 31 Biological Sciences; 3108 Plant Biology
10.1371/journal.pone.0226200	32 Biomedical and Clinical Sciences; 3210 Nutrition and Dietetics
10.1371/journal.pone.0226505	31 Biological Sciences; 3103 Ecology; 3104 Evolutionary Biology; 3105 Genetics
10.1371/journal.pone.0226902	46 Information and Computing Sciences; 4608 Human-Centred Computing
10.1371/journal.pone.0226829	30 Agricultural, Veterinary and Food Sciences; 31 Biological Sciences; 3109 Zoology
10.1371/journal.pone.0226865	31 Biological Sciences; 3105 Genetics
10.1371/journal.pone.0225345	31 Biological Sciences; 3103 Ecology; 37 Earth Sciences
10.1371/journal.pone.0226550	52 Psychology; 5205 Social and Personality Psychology
10.1371/journal.pone.0224542	35 Commerce, Management, Tourism and Services; 3505 Human Resources and Industrial Relations; 44 Human Society; 4410 Sociology
10.1371/journal.pcbi.1007403	31 Biological Sciences; 3102 Bioinformatics and Computational Biology; 46 Information and Computing Sciences
10.1371/journal.pone.0226944	42 Health Sciences; 4207 Sports Science and Exercise
10.1371/journal.pone.0226599	31 Biological Sciences; 3105 Genetics; 3108 Plant Biology
10.1371/journal.pone.0226613	32 Biomedical and Clinical Sciences; 3202 Clinical Sciences; 42 Health Sciences; 4203 Health Services and Systems; 4206 Public Health
10.1371/journal.pgen.1008512	31 Biological Sciences; 3103 Ecology; 3105 Genetics
10.1371/journal.pone.0226986	32 Biomedical and Clinical Sciences; 3202 Clinical Sciences
10.1371/journal.pone.0226506	42 Health Sciences; 4203 Health Services and Systems; 4205 Nursing
10.1371/journal.ppat.1008233	31 Biological Sciences; 3107 Microbiology; 32 Biomedical and Clinical Sciences; 3207 Medical Microbiology
10.1371/journal.pone.0226848	32 Biomedical and Clinical Sciences; 3202 Clinical Sciences; 42 Health Sciences
10.1371/journal.pone.0223341	32 Biomedical and Clinical Sciences; 3211 Oncology and Carcinogenesis
10.1371/journal.pcbi.1007562	31 Biological Sciences; 3107 Microbiology; 32 Biomedical and Clinical Sciences; 3207 Medical Microbiology
10.1371/journal.pone.0225788	32 Biomedical and Clinical Sciences; 3213 Paediatrics
10.1371/journal.pntd.0007938	31 Biological Sciences; 3103 Ecology
10.1371/journal.pone.0226594	40 Engineering; 46 Information and Computing Sciences; 4606 Distributed Computing and Systems Software
10.1371/journal.ppat.1007780	31 Biological Sciences; 3101 Biochemistry and Cell Biology
10.1371/journal.pone.0226907	31 Biological Sciences; 3107 Microbiology; 32 Biomedical and Clinical Sciences
10.1371/journal.pone.0226350	32 Biomedical and Clinical Sciences; 3202 Clinical Sciences; 3211 Oncology and Carcinogenesis
10.1371/journal.pone.0226795	42 Health Sciences; 4201 Allied Health and Rehabilitation Science
10.1371/journal.pone.0226842	33 Built Environment and Design; 44 Human Society; 4406 Human Geography
10.1371/journal.pcbi.1007118	46 Information and Computing Sciences; 4611 Machine Learning
10.1371/journal.pone.0226891	32 Biomedical and Clinical Sciences; 42 Health Sciences; 4204 Midwifery
10.1371/journal.pone.0226564	31 Biological Sciences; 3105 Genetics; 32 Biomedical and Clinical Sciences; 3214 Pharmacology and Pharmaceutical Sciences
10.1371/journal.pone.0226804	42 Health Sciences; 4203 Health Services and Systems; 4206 Public Health
10.1371/journal.pone.0226927	32 Biomedical and Clinical Sciences; 3213 Paediatrics
10.1371/journal.pgen.1008533	31 Biological Sciences; 3101 Biochemistry and Cell Biology
10.1371/journal.pone.0226625	32 Biomedical and Clinical Sciences; 3202 Clinical Sciences
10.1371/journal.pone.0218837	31 Biological Sciences; 3107 Microbiology; 32 Biomedical and Clinical Sciences; 3202 Clinical Sciences
10.1371/journal.pone.0223704	42 Health Sciences; 4203 Health Services and Systems; 4205 Nursing
10.1371/journal.pcbi.1007564	31 Biological Sciences; 3102 Bioinformatics and Computational Biology
10.1371/journal.pone.0219286	32 Biomedical and Clinical Sciences; 3202 Clinical Sciences; 42 Health Sciences
10.1371/journal.pone.0226853	32 Biomedical and Clinical Sciences; 3202 Clinical Sciences; 3211 Oncology and Carcinogenesis
10.1371/journal.pone.0226715	32 Biomedical and Clinical Sciences; 3202 Clinical Sciences; 46 Information and Computing Sciences
10.1371/journal.pone.0226570	31 Biological Sciences; 3101 Biochemistry and Cell Biology
10.1371/journal.pone.0226277	31 Biological Sciences; 3101 Biochemistry and Cell Biology
10.1371/journal.pone.0226884	32 Biomedical and Clinical Sciences; 3202 Clinical Sciences; 3207 Medical Microbiology
10.1371/journal.pone.0226971	31 Biological Sciences; 41 Environmental Sciences; 4104 Environmental Management
10.1371/journal.pgen.1007979	31 Biological Sciences; 3105 Genetics
10.1371/journal.pone.0226391	32 Biomedical and Clinical Sciences; 3202 Clinical Sciences; 3207 Medical Microbiology; 42 Health Sciences
10.1371/journal.pone.0226887	30 Agricultural, Veterinary and Food Sciences; 3007 Forestry Sciences; 41 Environmental Sciences
10.1371/journal.pone.0226696	31 Biological Sciences; 3101 Biochemistry and Cell Biology; 32 Biomedical and Clinical Sciences
10.1371/journal.pone.0225004	32 Biomedical and Clinical Sciences; 3202 Clinical Sciences
10.1371/journal.pone.0218644	42 Health Sciences; 4201 Allied Health and Rehabilitation Science; 4207 Sports Science and Exercise
10.1371/journal.pone.0225756	47 Language, Communication and Culture; 4704 Linguistics; 52 Psychology; 5202 Biological Psychology; 5204 Cognitive and Computational Psychology
10.1371/journal.pone.0226490	32 Biomedical and Clinical Sciences; 42 Health Sciences; 4206 Public Health
10.1371/journal.pbio.3000572	31 Biological Sciences
10.1371/journal.pmed.1002998	32 Biomedical and Clinical Sciences; 3202 Clinical Sciences; 3211 Oncology and Carcinogenesis; 42 Health Sciences
10.1371/journal.pone.0226155	30 Agricultural, Veterinary and Food Sciences; 3004 Crop and Pasture Production; 31 Biological Sciences; 3107 Microbiology
10.1371/journal.pgen.1008261	31 Biological Sciences; 3101 Biochemistry and Cell Biology
10.1371/journal.pone.0226839	32 Biomedical and Clinical Sciences; 3202 Clinical Sciences; 40 Engineering
10.1371/journal.ppat.1008232	31 Biological Sciences; 3107 Microbiology; 32 Biomedical and Clinical Sciences; 3207 Medical Microbiology
10.1371/journal.pone.0226561	32 Biomedical and Clinical Sciences; 3202 Clinical Sciences
10.1371/journal.pone.0226750	32 Biomedical and Clinical Sciences; 3201 Cardiovascular Medicine and Haematology; 3202 Clinical Sciences
10.1371/journal.pone.0226503	52 Psychology; 5204 Cognitive and Computational Psychology
10.1371/journal.pone.0226678	42 Health Sciences; 4202 Epidemiology
10.1371/journal.pone.0226812	42 Health Sciences; 4206 Public Health; 44 Human Society
10.1371/journal.pone.0225364	32 Biomedical and Clinical Sciences; 3202 Clinical Sciences; 42 Health Sciences
10.1371/journal.ppat.1008193	31 Biological Sciences; 3107 Microbiology; 32 Biomedical and Clinical Sciences; 3207 Medical Microbiology
10.1371/journal.pone.0226229	41 Environmental Sciences; 4104 Environmental Management
10.1371/journal.pone.0226746	31 Biological Sciences; 3105 Genetics
10.1371/journal.pone.0226354	40 Engineering; 4004 Chemical Engineering
10.1371/journal.pone.0226541	34 Chemical Sciences; 41 Environmental Sciences; 4105 Pollution and Contamination
10.1371/journal.pone.0226921	32 Biomedical and Clinical Sciences; 3213 Paediatrics
10.1371/journal.pone.0226717	42 Health Sciences; 4206 Public Health
10.1371/journal.pone.0226821	31 Biological Sciences; 32 Biomedical and Clinical Sciences; 3211 Oncology and Carcinogenesis
10.1371/journal.pntd.0007877	32 Biomedical and Clinical Sciences; 3202 Clinical Sciences
10.1371/journal.pone.0226426	32 Biomedical and Clinical Sciences; 3213 Paediatrics; 44 Human Society; 4408 Political Science
10.1371/journal.pone.0226709	32 Biomedical and Clinical Sciences; 3213 Paediatrics
10.1371/journal.pone.0226697	30 Agricultural, Veterinary and Food Sciences; 3009 Veterinary Sciences; 31 Biological Sciences
10.1371/journal.pone.0226673	32 Biomedical and Clinical Sciences; 3215 Reproductive Medicine; 42 Health Sciences; 4204 Midwifery
10.1371/journal.pone.0226598	37 Earth Sciences; 3701 Atmospheric Sciences; 46 Information and Computing Sciences
10.1371/journal.pone.0217833	46 Information and Computing Sciences; 4608 Human-Centred Computing; 52 Psychology; 5204 Cognitive and Computational Psychology
10.1371/journal.pone.0225713	43 History, Heritage and Archaeology; 4301 Archaeology; 4303 Historical Studies
10.1371/journal.pone.0226727	46 Information and Computing Sciences; 4610 Library and Information Studies
10.1371/journal.pone.0226572	46 Information and Computing Sciences; 4601 Applied Computing
10.1371/journal.pone.0226571	31 Biological Sciences; 3106 Industrial Biotechnology; 40 Engineering
10.1371/journal.pone.0226363	40 Engineering; 4003 Biomedical Engineering
10.1371/journal.pone.0226543	30 Agricultural, Veterinary and Food Sciences; 3004 Crop and Pasture Production; 31 Biological Sciences
10.1371/journal.pone.0225031	46 Information and Computing Sciences; 4604 Cybersecurity and Privacy
10.1371/journal.pone.0226647	47 Language, Communication and Culture; 4704 Linguistics; 52 Psychology
10.1371/journal.pone.0226061	31 Biological Sciences; 3101 Biochemistry and Cell Biology
10.1371/journal.pone.0226222	46 Information and Computing Sciences; 4611 Machine Learning
10.1371/journal.pone.0226836	30 Agricultural, Veterinary and Food Sciences; 3009 Veterinary Sciences; 32 Biomedical and Clinical Sciences; 3207 Medical Microbiology
10.1371/journal.pone.0226358	37 Earth Sciences; 3705 Geology; 3709 Physical Geography and Environmental Geoscience; 43 History, Heritage and Archaeology; 4301 Archaeology; 4303 Historical Studies
10.1371/journal.pone.0226796	46 Information and Computing Sciences; 4604 Cybersecurity and Privacy
10.1371/journal.pone.0226331	31 Biological Sciences; 3103 Ecology; 41 Environmental Sciences
10.1371/journal.pone.0226566	32 Biomedical and Clinical Sciences; 42 Health Sciences; 4206 Public Health
10.1371/journal.pone.0226644	32 Biomedical and Clinical Sciences; 42 Health Sciences; 4206 Public Health
10.1371/journal.pcbi.1007560	31 Biological Sciences; 46 Information and Computing Sciences; 4611 Machine Learning
10.1371/journal.pone.0226230	32 Biomedical and Clinical Sciences; 3202 Clinical Sciences; 42 Health Sciences; 4203 Health Services and Systems
10.1371/journal.pone.0226400	31 Biological Sciences; 3105 Genetics; 32 Biomedical and Clinical Sciences
10.1371/journal.pone.0226006	32 Biomedical and Clinical Sciences; 3202 Clinical Sciences
10.1371/journal.pone.0225722	32 Biomedical and Clinical Sciences; 3202 Clinical Sciences; 42 Health Sciences; 4203 Health Services and Systems
10.1371/journal.pone.0226551	30 Agricultural, Veterinary and Food Sciences; 3004 Crop and Pasture Production; 31 Biological Sciences; 3103 Ecology
10.1371/journal.pone.0226782	41 Environmental Sciences; 4104 Environmental Management
10.1371/journal.pone.0226737	52 Psychology; 5202 Biological Psychology; 5205 Social and Personality Psychology
10.1371/journal.pone.0226747	52 Psychology; 5201 Applied and Developmental Psychology; 5205 Social and Personality Psychology
10.1371/journal.pone.0226720	32 Biomedical and Clinical Sciences; 3210 Nutrition and Dietetics; 42 Health Sciences; 4206 Public Health; 44 Human Society
10.1371/journal.pone.0226734	36 Creative Arts and Writing; 3603 Music
10.1371/journal.ppat.1008109	32 Biomedical and Clinical Sciences; 3202 Clinical Sciences; 3207 Medical Microbiology
10.1371/journal.pone.0226726	32 Biomedical and Clinical Sciences; 3211 Oncology and Carcinogenesis
10.1371/journal.pone.0225912	31 Biological Sciences; 3101 Biochemistry and Cell Biology; 32 Biomedical and Clinical Sciences
10.1371/journal.pone.0226604	31 Biological Sciences; 3101 Biochemistry and Cell Biology; 3102 Bioinformatics and Computational Biology; 3105 Genetics
10.1371/journal.pone.0224214	31 Biological Sciences; 3103 Ecology; 41 Environmental Sciences
10.1371/journal.pone.0226519	41 Environmental Sciences; 4101 Climate Change Impacts and Adaptation
10.1371/journal.pone.0226651	32 Biomedical and Clinical Sciences; 3204 Immunology; 3207 Medical Microbiology
10.1371/journal.pone.0218653	31 Biological Sciences; 3101 Biochemistry and Cell Biology
10.1371/journal.pone.0226133	32 Biomedical and Clinical Sciences; 42 Health Sciences; 4206 Public Health; 44 Human Society
10.1371/journal.pgen.1008126	31 Biological Sciences; 3105 Genetics; 3108 Plant Biology
10.1371/journal.pone.0226695	30 Agricultural, Veterinary and Food Sciences; 31 Biological Sciences; 3108 Plant Biology
10.1371/journal.pone.0225864	32 Biomedical and Clinical Sciences; 3208 Medical Physiology
10.1371/journal.pone.0226510	42 Health Sciences; 4203 Health Services and Systems; 4205 Nursing
10.1371/journal.pone.0226487	31 Biological Sciences; 3103 Ecology
10.1371/journal.pone.0226419	32 Biomedical and Clinical Sciences; 3205 Medical Biochemistry and Metabolomics; 3215 Reproductive Medicine
10.1371/journal.pone.0226562	32 Biomedical and Clinical Sciences; 3202 Clinical Sciences; 42 Health Sciences; 4203 Health Services and Systems
10.1371/journal.pone.0226412	32 Biomedical and Clinical Sciences; 3202 Clinical Sciences
10.1371/journal.pone.0226641	32 Biomedical and Clinical Sciences; 3202 Clinical Sciences
10.1371/journal.pone.0226579	31 Biological Sciences; 3101 Biochemistry and Cell Biology
10.1371/journal.pone.0226399	31 Biological Sciences; 3103 Ecology; 41 Environmental Sciences
10.1371/journal.pgen.1008440	31 Biological Sciences; 3105 Genetics
10.1371/journal.pgen.1008506	31 Biological Sciences; 3107 Microbiology
10.1371/journal.pone.0226151	30 Agricultural, Veterinary and Food Sciences; 3004 Crop and Pasture Production; 31 Biological Sciences; 3108 Plant Biology
10.1371/journal.pone.0225673	32 Biomedical and Clinical Sciences; 3202 Clinical Sciences; 3211 Oncology and Carcinogenesis; 51 Physical Sciences; 5105 Medical and Biological Physics
10.1371/journal.pone.0224422	42 Health Sciences; 4206 Public Health
10.1371/journal.pone.0222055	34 Chemical Sciences; 3404 Medicinal and Biomolecular Chemistry
10.1371/journal.pone.0224925	32 Biomedical and Clinical Sciences; 3202 Clinical Sciences; 44 Human Society
10.1371/journal.pone.0225882	32 Biomedical and Clinical Sciences; 3202 Clinical Sciences; 3207 Medical Microbiology
10.1371/journal.pone.0226187	32 Biomedical and Clinical Sciences; 3211 Oncology and Carcinogenesis
10.1371/journal.pone.0226003	32 Biomedical and Clinical Sciences; 3210 Nutrition and Dietetics; 42 Health Sciences; 4206 Public Health
10.1371/journal.pone.0225398	31 Biological Sciences; 3103 Ecology; 41 Environmental Sciences; 4102 Ecological Applications; 4104 Environmental Management
10.1371/journal.pone.0226262	31 Biological Sciences; 3101 Biochemistry and Cell Biology; 32 Biomedical and Clinical Sciences; 3215 Reproductive Medicine; 44 Human Society; 4403 Demography
10.1371/journal.pone.0224105	32 Biomedical and Clinical Sciences; 3202 Clinical Sciences
10.1371/journal.pone.0226085	32 Biomedical and Clinical Sciences; 3202 Clinical Sciences; 42 Health Sciences; 4201 Allied Health and Rehabilitation Science
10.1371/journal.pcbi.1007550	46 Information and Computing Sciences; 4602 Artificial Intelligence
10.1371/journal.pcbi.1006997	32 Biomedical and Clinical Sciences; 51 Physical Sciences; 5105 Medical and Biological Physics
10.1371/journal.pcbi.1007524	31 Biological Sciences; 3107 Microbiology; 32 Biomedical and Clinical Sciences; 3205 Medical Biochemistry and Metabolomics
10.1371/journal.pntd.0007809	32 Biomedical and Clinical Sciences; 3202 Clinical Sciences
10.1371/journal.pcbi.1007548	40 Engineering; 4003 Biomedical Engineering; 51 Physical Sciences
10.1371/journal.pntd.0007651	31 Biological Sciences; 32 Biomedical and Clinical Sciences; 3205 Medical Biochemistry and Metabolomics
10.1371/journal.pone.0226136	31 Biological Sciences; 3103 Ecology
10.1371/journal.pone.0222560	43 History, Heritage and Archaeology; 4301 Archaeology; 4303 Historical Studies
10.1371/journal.pone.0226401	42 Health Sciences; 4203 Health Services and Systems; 4205 Nursing
10.1371/journal.pone.0226475	32 Biomedical and Clinical Sciences; 3211 Oncology and Carcinogenesis
10.1371/journal.pone.0224923	32 Biomedical and Clinical Sciences; 3202 Clinical Sciences
10.1371/journal.pone.0226342	42 Health Sciences; 4202 Epidemiology; 4206 Public Health
10.1371/journal.pone.0224594	32 Biomedical and Clinical Sciences; 3202 Clinical Sciences
10.1371/journal.pone.0226757	31 Biological Sciences; 3101 Biochemistry and Cell Biology; 51 Physical Sciences
10.1371/journal.pone.0226355	41 Environmental Sciences; 4106 Soil Sciences
10.1371/journal.pone.0226370	41 Environmental Sciences; 4104 Environmental Management
10.1371/journal.pone.0226627	32 Biomedical and Clinical Sciences; 3202 Clinical Sciences
10.1371/journal.pone.0226322	42 Health Sciences; 4203 Health Services and Systems
10.1371/journal.pone.0224150	38 Economics; 3801 Applied Economics; 3803 Economic Theory
10.1371/journal.pone.0226528	40 Engineering; 4016 Materials Engineering
10.1371/journal.pone.0226650	32 Biomedical and Clinical Sciences; 37 Earth Sciences; 3705 Geology
10.1371/journal.pone.0226674	32 Biomedical and Clinical Sciences; 3202 Clinical Sciences
10.1371/journal.pone.0225720	32 Biomedical and Clinical Sciences; 42 Health Sciences; 4202 Epidemiology
10.1371/journal.pone.0225540	32 Biomedical and Clinical Sciences; 3202 Clinical Sciences; 42 Health Sciences; 4203 Health Services and Systems
10.1371/journal.pone.0225838	46 Information and Computing Sciences; 4605 Data Management and Data Science
10.1371/journal.pone.0225796	31 Biological Sciences; 3107 Microbiology
10.1371/journal.pone.0225099	32 Biomedical and Clinical Sciences; 3203 Dentistry
10.1371/journal.pone.0226699	31 Biological Sciences; 3107 Microbiology; 32 Biomedical and Clinical Sciences; 3207 Medical Microbiology; 3215 Reproductive Medicine
10.1371/journal.pone.0225817	32 Biomedical and Clinical Sciences; 3202 Clinical Sciences
10.1371/journal.pone.0220091	31 Biological Sciences; 46 Information and Computing Sciences; 4605 Data Management and Data Science
10.1371/journal.pone.0226635	30 Agricultural, Veterinary and Food Sciences; 3005 Fisheries Sciences
10.1371/journal.pone.0226638	30 Agricultural, Veterinary and Food Sciences; 3005 Fisheries Sciences; 31 Biological Sciences; 3103 Ecology; 41 Environmental Sciences
10.1371/journal.pone.0225819	52 Psychology; 5202 Biological Psychology; 5204 Cognitive and Computational Psychology
10.1371/journal.pone.0226270	31 Biological Sciences; 32 Biomedical and Clinical Sciences; 3202 Clinical Sciences; 3207 Medical Microbiology
10.1371/journal.pone.0217886	32 Biomedical and Clinical Sciences; 3202 Clinical Sciences; 42 Health Sciences
10.1371/journal.pone.0226427	32 Biomedical and Clinical Sciences; 3211 Oncology and Carcinogenesis
10.1371/journal.pone.0225799	40 Engineering; 4005 Civil Engineering
10.1371/journal.pntd.0007705	32 Biomedical and Clinical Sciences; 3202 Clinical Sciences
10.1371/journal.pone.0225813	32 Biomedical and Clinical Sciences; 3202 Clinical Sciences
10.1371/journal.pone.0225883	46 Information and Computing Sciences; 4610 Library and Information Studies
10.1371/journal.pmed.1002990	32 Biomedical and Clinical Sciences; 3215 Reproductive Medicine; 42 Health Sciences; 4206 Public Health
10.1371/journal.pone.0226614	32 Biomedical and Clinical Sciences; 42 Health Sciences; 4206 Public Health
10.1371/journal.pone.0226578	31 Biological Sciences; 3107 Microbiology; 32 Biomedical and Clinical Sciences; 34 Chemical Sciences; 3401 Analytical Chemistry
10.1371/journal.pone.0226624	30 Agricultural, Veterinary and Food Sciences; 3004 Crop and Pasture Production; 31 Biological Sciences; 3103 Ecology; 3108 Plant Biology
10.1371/journal.pone.0226338	31 Biological Sciences; 3102 Bioinformatics and Computational Biology; 3105 Genetics
10.1371/journal.pone.0225805	31 Biological Sciences; 3109 Zoology; 41 Environmental Sciences; 4104 Environmental Management
10.1371/journal.pone.0226130	31 Biological Sciences; 3103 Ecology; 3104 Evolutionary Biology; 3109 Zoology; 37 Earth Sciences; 3705 Geology
10.1371/journal.pone.0225758	37 Earth Sciences; 3707 Hydrology
10.1371/journal.pone.0226410	31 Biological Sciences; 3103 Ecology; 41 Environmental Sciences
10.1371/journal.pone.0226632	32 Biomedical and Clinical Sciences; 42 Health Sciences; 4203 Health Services and Systems
10.1371/journal.pone.0223802	31 Biological Sciences; 3103 Ecology; 41 Environmental Sciences
10.1371/journal.pcbi.1007556	31 Biological Sciences; 3102 Bioinformatics and Computational Biology; 3105 Genetics; 42 Health Sciences; 4202 Epidemiology
10.1371/journal.pone.0226255	32 Biomedical and Clinical Sciences; 3202 Clinical Sciences
10.1371/journal.pone.0226302	32 Biomedical and Clinical Sciences; 3208 Medical Physiology
10.1371/journal.pone.0226384	32 Biomedical and Clinical Sciences; 3202 Clinical Sciences; 42 Health Sciences; 4206 Public Health
10.1371/journal.pone.0225853	35 Commerce, Management, Tourism and Services; 3507 Strategy, Management and Organisational Behaviour; 46 Information and Computing Sciences
10.1371/journal.pone.0225696	33 Built Environment and Design; 3303 Design; 35 Commerce, Management, Tourism and Services
10.1371/journal.pone.0225822	30 Agricultural, Veterinary and Food Sciences; 3009 Veterinary Sciences; 31 Biological Sciences; 3105 Genetics
10.1371/journal.pone.0226440	32 Biomedical and Clinical Sciences; 3208 Medical Physiology
10.1371/journal.pone.0225988	40 Engineering; 4007 Control Engineering, Mechatronics and Robotics; 49 Mathematical Sciences; 4901 Applied Mathematics
10.1371/journal.pone.0224216	38 Economics; 3801 Applied Economics
10.1371/journal.pone.0219879	31 Biological Sciences; 3107 Microbiology; 32 Biomedical and Clinical Sciences; 3202 Clinical Sciences; 3207 Medical Microbiology
10.1371/journal.pone.0226679	32 Biomedical and Clinical Sciences; 3213 Paediatrics
10.1371/journal.pone.0225797	34 Chemical Sciences; 3403 Macromolecular and Materials Chemistry; 51 Physical Sciences
10.1371/journal.pone.0226381	32 Biomedical and Clinical Sciences; 3208 Medical Physiology
10.1371/journal.pone.0225942	32 Biomedical and Clinical Sciences; 3211 Oncology and Carcinogenesis; 42 Health Sciences
10.1371/journal.pone.0226617	32 Biomedical and Clinical Sciences; 3207 Medical Microbiology; 41 Environmental Sciences
10.1371/journal.pbio.3000545	31 Biological Sciences; 3101 Biochemistry and Cell Biology; 32 Biomedical and Clinical Sciences
10.1371/journal.pone.0226700	30 Agricultural, Veterinary and Food Sciences; 3004 Crop and Pasture Production; 3008 Horticultural Production; 31 Biological Sciences
10.1371/journal.pone.0226223	52 Psychology; 5201 Applied and Developmental Psychology; 5205 Social and Personality Psychology
10.1371/journal.pgen.1008482	31 Biological Sciences; 3105 Genetics
10.1371/journal.pone.0226675	31 Biological Sciences; 3101 Biochemistry and Cell Biology; 32 Biomedical and Clinical Sciences; 3202 Clinical Sciences
10.1371/journal.pone.0226094	32 Biomedical and Clinical Sciences; 3209 Neurosciences; 46 Information and Computing Sciences
10.1371/journal.pmed.1002995	32 Biomedical and Clinical Sciences; 42 Health Sciences
10.1371/journal.pcbi.1007561	32 Biomedical and Clinical Sciences; 42 Health Sciences; 4206 Public Health
10.1371/journal.pone.0226615	32 Biomedical and Clinical Sciences; 3204 Immunology
10.1371/journal.pone.0226423	31 Biological Sciences; 3103 Ecology; 3108 Plant Biology
10.1371/journal.pone.0226176	46 Information and Computing Sciences; 4605 Data Management and Data Science
10.1371/journal.pone.0225609	32 Biomedical and Clinical Sciences; 3213 Paediatrics; 42 Health Sciences; 4206 Public Health
10.1371/journal.pone.0226521	32 Biomedical and Clinical Sciences; 46 Information and Computing Sciences; 51 Physical Sciences; 5105 Medical and Biological Physics
10.1371/journal.pone.0226320	32 Biomedical and Clinical Sciences; 3202 Clinical Sciences
10.1371/journal.pone.0225744	42 Health Sciences; 4203 Health Services and Systems
10.1371/journal.pcbi.1007219	31 Biological Sciences; 3102 Bioinformatics and Computational Biology
10.1371/journal.pone.0226167	32 Biomedical and Clinical Sciences; 3202 Clinical Sciences
10.1371/journal.pone.0226436	32 Biomedical and Clinical Sciences; 3207 Medical Microbiology
10.1371/journal.pone.0226633	30 Agricultural, Veterinary and Food Sciences; 3006 Food Sciences; 40 Engineering; 4004 Chemical Engineering
10.1371/journal.pone.0226596	42 Health Sciences; 4207 Sports Science and Exercise
10.1371/journal.pone.0225909	42 Health Sciences; 4202 Epidemiology; 4206 Public Health
10.1371/journal.pone.0226266	32 Biomedical and Clinical Sciences; 3203 Dentistry
10.1371/journal.pone.0226652	31 Biological Sciences; 3101 Biochemistry and Cell Biology
10.1371/journal.pone.0226573	32 Biomedical and Clinical Sciences; 3207 Medical Microbiology
10.1371/journal.pone.0226405	32 Biomedical and Clinical Sciences; 3202 Clinical Sciences
10.1371/journal.pone.0225903	38 Economics; 41 Environmental Sciences; 4104 Environmental Management
10.1371/journal.pone.0226623	32 Biomedical and Clinical Sciences; 42 Health Sciences; 4206 Public Health
10.1371/journal.pone.0226414	50 Philosophy and Religious Studies; 5004 Religious Studies
10.1371/journal.pone.0226554	42 Health Sciences; 4206 Public Health
10.1371/journal.pone.0226601	42 Health Sciences; 4208 Traditional, Complementary and Integrative Medicine
10.1371/journal.pone.0226043	32 Biomedical and Clinical Sciences; 3202 Clinical Sciences
10.1371/journal.pone.0226274	32 Biomedical and Clinical Sciences; 3202 Clinical Sciences; 42 Health Sciences; 4201 Allied Health and Rehabilitation Science; 4207 Sports Science and Exercise
10.1371/journal.pone.0214979	30 Agricultural, Veterinary and Food Sciences; 3002 Agriculture, Land and Farm Management; 3004 Crop and Pasture Production; 31 Biological Sciences; 3108 Plant Biology
10.1371/journal.pone.0226672	32 Biomedical and Clinical Sciences; 3202 Clinical Sciences
10.1371/journal.pmed.1002981	32 Biomedical and Clinical Sciences; 3210 Nutrition and Dietetics; 42 Health Sciences; 4206 Public Health
10.1371/journal.pone.0226371	32 Biomedical and Clinical Sciences; 3202 Clinical Sciences; 42 Health Sciences; 4201 Allied Health and Rehabilitation Science
10.1371/journal.pone.0226523	30 Agricultural, Veterinary and Food Sciences; 3004 Crop and Pasture Production; 31 Biological Sciences; 3108 Plant Biology
10.1371/journal.pone.0226226	32 Biomedical and Clinical Sciences; 3202 Clinical Sciences
10.1371/journal.pmed.1002978	42 Health Sciences; 4206 Public Health
10.1371/journal.pone.0226407	32 Biomedical and Clinical Sciences; 3211 Oncology and Carcinogenesis; 42 Health Sciences; 4203 Health Services and Systems
10.1371/journal.pone.0225881	31 Biological Sciences; 3101 Biochemistry and Cell Biology
10.1371/journal.pone.0222737	30 Agricultural, Veterinary and Food Sciences; 31 Biological Sciences; 3103 Ecology; 3107 Microbiology
10.1371/journal.ppat.1008228	31 Biological Sciences; 3101 Biochemistry and Cell Biology; 32 Biomedical and Clinical Sciences
10.1371/journal.ppat.1008180	32 Biomedical and Clinical Sciences; 3204 Immunology
10.1371/journal.ppat.1008165	32 Biomedical and Clinical Sciences; 3204 Immunology; 3207 Medical Microbiology
10.1371/journal.ppat.1008066	31 Biological Sciences; 3107 Microbiology; 32 Biomedical and Clinical Sciences
10.1371/journal.ppat.1008064	32 Biomedical and Clinical Sciences; 3204 Immunology; 3207 Medical Microbiology
10.1371/journal.pone.0226622	42 Health Sciences; 4206 Public Health
10.1371/journal.pone.0226612	44 Human Society; 4404 Development Studies
10.1371/journal.pone.0226569	32 Biomedical and Clinical Sciences; 52 Psychology; 5202 Biological Psychology
10.1371/journal.pone.0226559	30 Agricultural, Veterinary and Food Sciences; 3004 Crop and Pasture Production
10.1371/journal.pone.0226548	42 Health Sciences; 4203 Health Services and Systems
10.1371/journal.pone.0226545	31 Biological Sciences; 32 Biomedical and Clinical Sciences; 3215 Reproductive Medicine
10.1371/journal.pone.0226527	31 Biological Sciences; 3103 Ecology; 41 Environmental Sciences
10.1371/journal.pone.0226520	32 Biomedical and Clinical Sciences; 3215 Reproductive Medicine
10.1371/journal.pone.0226499	40 Engineering; 4006 Communications Engineering; 4008 Electrical Engineering; 4009 Electronics, Sensors and Digital Hardware
10.1371/journal.pone.0226476	30 Agricultural, Veterinary and Food Sciences; 3001 Agricultural Biotechnology
10.1371/journal.pone.0226474	30 Agricultural, Veterinary and Food Sciences; 3007 Forestry Sciences; 31 Biological Sciences; 3103 Ecology
10.1371/journal.pone.0226441	35 Commerce, Management, Tourism and Services; 3509 Transportation, Logistics and Supply Chains; 42 Health Sciences; 4206 Public Health
10.1371/journal.pone.0226433	32 Biomedical and Clinical Sciences; 3202 Clinical Sciences; 42 Health Sciences; 4203 Health Services and Systems
10.1371/journal.pone.0226428	38 Economics; 3801 Applied Economics; 46 Information and Computing Sciences
10.1371/journal.pone.0226394	35 Commerce, Management, Tourism and Services; 3505 Human Resources and Industrial Relations
10.1371/journal.pone.0226388	32 Biomedical and Clinical Sciences; 3204 Immunology
10.1371/journal.pone.0226387	52 Psychology; 5202 Biological Psychology
10.1371/journal.pone.0226373	37 Earth Sciences; 40 Engineering; 4013 Geomatic Engineering
10.1371/journal.pone.0226352	32 Biomedical and Clinical Sciences; 3211 Oncology and Carcinogenesis; 42 Health Sciences; 4203 Health Services and Systems
10.1371/journal.pone.0226336	30 Agricultural, Veterinary and Food Sciences; 3009 Veterinary Sciences; 32 Biomedical and Clinical Sciences
10.1371/journal.pone.0226334	43 History, Heritage and Archaeology; 4301 Archaeology; 4303 Historical Studies
10.1371/journal.pone.0226308	32 Biomedical and Clinical Sciences; 3212 Ophthalmology and Optometry; 40 Engineering
10.1371/journal.pone.0226280	30 Agricultural, Veterinary and Food Sciences; 3009 Veterinary Sciences
10.1371/journal.pone.0226261	32 Biomedical and Clinical Sciences; 3215 Reproductive Medicine; 42 Health Sciences; 4203 Health Services and Systems
10.1371/journal.pone.0226239	31 Biological Sciences; 3103 Ecology; 3107 Microbiology
10.1371/journal.pone.0226206	32 Biomedical and Clinical Sciences; 3209 Neurosciences; 51 Physical Sciences
10.1371/journal.pone.0226199	32 Biomedical and Clinical Sciences; 34 Chemical Sciences; 3404 Medicinal and Biomolecular Chemistry
10.1371/journal.pone.0226193	32 Biomedical and Clinical Sciences; 3202 Clinical Sciences; 3211 Oncology and Carcinogenesis
10.1371/journal.pone.0226036	52 Psychology; 5203 Clinical and Health Psychology
10.1371/journal.pone.0225976	30 Agricultural, Veterinary and Food Sciences; 31 Biological Sciences; 3102 Bioinformatics and Computational Biology; 3105 Genetics; 3108 Plant Biology
10.1371/journal.pone.0225955	32 Biomedical and Clinical Sciences; 3215 Reproductive Medicine
10.1371/journal.pone.0225935	37 Earth Sciences; 3707 Hydrology
10.1371/journal.pone.0225900	46 Information and Computing Sciences; 4611 Machine Learning
10.1371/journal.pone.0225660	32 Biomedical and Clinical Sciences; 3211 Oncology and Carcinogenesis; 41 Environmental Sciences; 4102 Ecological Applications
10.1371/journal.pone.0225635	32 Biomedical and Clinical Sciences; 42 Health Sciences; 4203 Health Services and Systems; 4205 Nursing
10.1371/journal.pone.0225600	32 Biomedical and Clinical Sciences; 3210 Nutrition and Dietetics
10.1371/journal.pone.0225591	32 Biomedical and Clinical Sciences; 3215 Reproductive Medicine; 42 Health Sciences
10.1371/journal.pone.0225588	32 Biomedical and Clinical Sciences; 3204 Immunology; 3207 Medical Microbiology
10.1371/journal.pone.0224662	37 Earth Sciences; 3701 Atmospheric Sciences; 3702 Climate Change Science
10.1371/journal.pone.0224431	30 Agricultural, Veterinary and Food Sciences; 41 Environmental Sciences; 4103 Environmental Biotechnology
10.1371/journal.pone.0224356	31 Biological Sciences; 3107 Microbiology; 32 Biomedical and Clinical Sciences; 3202 Clinical Sciences
10.1371/journal.pone.0224174	46 Information and Computing Sciences; 52 Psychology; 5202 Biological Psychology
10.1371/journal.pone.0221193	31 Biological Sciences; 3107 Microbiology; 44 Human Society
10.1371/journal.pone.0220422	31 Biological Sciences; 3103 Ecology; 41 Environmental Sciences
10.1371/journal.pone.0219231	31 Biological Sciences; 3102 Bioinformatics and Computational Biology; 3107 Microbiology
10.1371/journal.pntd.0007937	42 Health Sciences; 4203 Health Services and Systems; 4205 Nursing
10.1371/journal.pntd.0007924	32 Biomedical and Clinical Sciences; 42 Health Sciences; 4203 Health Services and Systems
10.1371/journal.pntd.0007915	32 Biomedical and Clinical Sciences; 3207 Medical Microbiology
10.1371/journal.pntd.0007430	32 Biomedical and Clinical Sciences; 3202 Clinical Sciences
10.1371/journal.pntd.0006927	31 Biological Sciences
10.1371/journal.pgen.1008553	31 Biological Sciences; 3101 Biochemistry and Cell Biology; 3105 Genetics
10.1371/journal.pgen.1008545	31 Biological Sciences; 3105 Genetics
10.1371/journal.pgen.1008536	31 Biological Sciences; 3105 Genetics
10.1371/journal.pgen.1008530	31 Biological Sciences; 3105 Genetics
10.1371/journal.pgen.1008520	31 Biological Sciences; 3103 Ecology; 3105 Genetics
10.1371/journal.pbio.3000525	32 Biomedical and Clinical Sciences; 3209 Neurosciences
10.1371/journal.ppat.1008210	31 Biological Sciences; 3102 Bioinformatics and Computational Biology
10.1371/journal.pone.0226558	30 Agricultural, Veterinary and Food Sciences; 31 Biological Sciences; 3101 Biochemistry and Cell Biology; 32 Biomedical and Clinical Sciences; 3215 Reproductive Medicine
10.1371/journal.pone.0226518	32 Biomedical and Clinical Sciences; 3202 Clinical Sciences; 42 Health Sciences
10.1371/journal.pone.0226432	31 Biological Sciences; 3103 Ecology; 3107 Microbiology; 41 Environmental Sciences; 4101 Climate Change Impacts and Adaptation
10.1371/journal.pone.0226430	30 Agricultural, Veterinary and Food Sciences; 3009 Veterinary Sciences; 32 Biomedical and Clinical Sciences; 3202 Clinical Sciences
10.1371/journal.pone.0226425	31 Biological Sciences; 3105 Genetics; 32 Biomedical and Clinical Sciences
10.1371/journal.pone.0226418	31 Biological Sciences; 3103 Ecology; 41 Environmental Sciences; 4102 Ecological Applications; 4104 Environmental Management
10.1371/journal.pone.0226406	31 Biological Sciences; 3101 Biochemistry and Cell Biology; 32 Biomedical and Clinical Sciences; 3208 Medical Physiology
10.1371/journal.pone.0226356	32 Biomedical and Clinical Sciences; 3211 Oncology and Carcinogenesis; 34 Chemical Sciences; 3404 Medicinal and Biomolecular Chemistry
10.1371/journal.pone.0226353	32 Biomedical and Clinical Sciences; 3202 Clinical Sciences; 42 Health Sciences
10.1371/journal.pone.0226348	32 Biomedical and Clinical Sciences; 3211 Oncology and Carcinogenesis
10.1371/journal.pone.0226305	42 Health Sciences; 46 Information and Computing Sciences; 4610 Library and Information Studies
10.1371/journal.pone.0226299	49 Mathematical Sciences; 4904 Pure Mathematics
10.1371/journal.pone.0226273	37 Earth Sciences; 3709 Physical Geography and Environmental Geoscience
10.1371/journal.pone.0226272	46 Information and Computing Sciences; 4611 Machine Learning
10.1371/journal.pone.0226265	32 Biomedical and Clinical Sciences; 3211 Oncology and Carcinogenesis
10.1371/journal.pone.0226256	31 Biological Sciences; 3102 Bioinformatics and Computational Biology; 46 Information and Computing Sciences
10.1371/journal.pone.0226250	31 Biological Sciences; 3101 Biochemistry and Cell Biology; 32 Biomedical and Clinical Sciences
10.1371/journal.pone.0226231	32 Biomedical and Clinical Sciences; 3210 Nutrition and Dietetics; 42 Health Sciences; 4206 Public Health
10.1371/journal.pone.0226227	32 Biomedical and Clinical Sciences; 3202 Clinical Sciences; 42 Health Sciences; 4201 Allied Health and Rehabilitation Science
10.1371/journal.pone.0226211	46 Information and Computing Sciences; 4608 Human-Centred Computing; 52 Psychology; 5202 Biological Psychology
10.1371/journal.pone.0226201	42 Health Sciences; 4201 Allied Health and Rehabilitation Science; 4203 Health Services and Systems
10.1371/journal.pone.0226198	32 Biomedical and Clinical Sciences; 3215 Reproductive Medicine; 42 Health Sciences; 4204 Midwifery
10.1371/journal.pone.0226186	31 Biological Sciences; 3107 Microbiology
10.1371/journal.pone.0226177	31 Biological Sciences; 3101 Biochemistry and Cell Biology
10.1371/journal.pone.0226169	38 Economics; 3801 Applied Economics; 42 Health Sciences
10.1371/journal.pone.0226077	42 Health Sciences; 4203 Health Services and Systems
10.1371/journal.pone.0226076	32 Biomedical and Clinical Sciences; 42 Health Sciences; 4203 Health Services and Systems
10.1371/journal.pone.0226002	31 Biological Sciences; 3105 Genetics
10.1371/journal.pone.0225998	32 Biomedical and Clinical Sciences; 3201 Cardiovascular Medicine and Haematology; 3204 Immunology
10.1371/journal.pone.0225898	32 Biomedical and Clinical Sciences; 3211 Oncology and Carcinogenesis
10.1371/journal.pone.0225757	52 Psychology; 5202 Biological Psychology; 5204 Cognitive and Computational Psychology
10.1371/journal.pone.0225663	32 Biomedical and Clinical Sciences; 3202 Clinical Sciences
10.1371/journal.pone.0225652	41 Environmental Sciences; 4101 Climate Change Impacts and Adaptation
10.1371/journal.pone.0225441	42 Health Sciences; 4204 Midwifery; 44 Human Society
10.1371/journal.pone.0225406	32 Biomedical and Clinical Sciences; 42 Health Sciences; 4206 Public Health
10.1371/journal.pone.0225312	32 Biomedical and Clinical Sciences; 3213 Paediatrics; 42 Health Sciences
10.1371/journal.pone.0225167	35 Commerce, Management, Tourism and Services; 3507 Strategy, Management and Organisational Behaviour; 42 Health Sciences; 4203 Health Services and Systems
10.1371/journal.pone.0224642	46 Information and Computing Sciences; 4611 Machine Learning
10.1371/journal.pone.0220220	31 Biological Sciences; 32 Biomedical and Clinical Sciences; 3212 Ophthalmology and Optometry
10.1371/journal.pntd.0007935	32 Biomedical and Clinical Sciences; 3202 Clinical Sciences; 42 Health Sciences; 4201 Allied Health and Rehabilitation Science; 4203 Health Services and Systems
10.1371/journal.pmed.1002992	32 Biomedical and Clinical Sciences; 3202 Clinical Sciences
10.1371/journal.pgen.1008526	31 Biological Sciences; 3101 Biochemistry and Cell Biology; 3105 Genetics
10.1371/journal.pgen.1008481	31 Biological Sciences; 3105 Genetics
10.1371/journal.pbio.3000329	31 Biological Sciences; 3101 Biochemistry and Cell Biology; 32 Biomedical and Clinical Sciences
10.1371/journal.ppat.1008224	31 Biological Sciences; 3107 Microbiology
10.1371/journal.ppat.1008174	32 Biomedical and Clinical Sciences; 3211 Oncology and Carcinogenesis
10.1371/journal.ppat.1008173	32 Biomedical and Clinical Sciences; 3207 Medical Microbiology
10.1371/journal.ppat.1008129	31 Biological Sciences; 3101 Biochemistry and Cell Biology; 3102 Bioinformatics and Computational Biology
10.1371/journal.pone.0226508	37 Earth Sciences; 3704 Geoinformatics
10.1371/journal.pone.0226500	31 Biological Sciences; 3107 Microbiology
10.1371/journal.pone.0226493	42 Health Sciences; 4203 Health Services and Systems
10.1371/journal.pone.0226479	32 Biomedical and Clinical Sciences; 40 Engineering; 4003 Biomedical Engineering
10.1371/journal.pone.0226437	42 Health Sciences; 4203 Health Services and Systems
10.1371/journal.pone.0226416	35 Commerce, Management, Tourism and Services; 3505 Human Resources and Industrial Relations
10.1371/journal.pone.0226409	42 Health Sciences; 4203 Health Services and Systems; 52 Psychology; 5202 Biological Psychology
10.1371/journal.pone.0226390	32 Biomedical and Clinical Sciences; 3206 Medical Biotechnology
10.1371/journal.pone.0226385	32 Biomedical and Clinical Sciences; 52 Psychology; 5202 Biological Psychology
10.1371/journal.pone.0226377	32 Biomedical and Clinical Sciences; 3214 Pharmacology and Pharmaceutical Sciences; 52 Psychology; 5202 Biological Psychology
10.1371/journal.pone.0226368	31 Biological Sciences; 3101 Biochemistry and Cell Biology
10.1371/journal.pone.0226365	31 Biological Sciences; 3102 Bioinformatics and Computational Biology; 3103 Ecology; 3105 Genetics
10.1371/journal.pone.0226364	32 Biomedical and Clinical Sciences; 3202 Clinical Sciences
10.1371/journal.pone.0226361	42 Health Sciences; 4203 Health Services and Systems
10.1371/journal.pone.0226360	30 Agricultural, Veterinary and Food Sciences; 3003 Animal Production; 3004 Crop and Pasture Production
10.1371/journal.pone.0226349	32 Biomedical and Clinical Sciences; 3214 Pharmacology and Pharmaceutical Sciences; 44 Human Society
10.1371/journal.pone.0226347	32 Biomedical and Clinical Sciences; 3204 Immunology; 3207 Medical Microbiology
10.1371/journal.pone.0226335	32 Biomedical and Clinical Sciences; 3215 Reproductive Medicine; 42 Health Sciences
10.1371/journal.pone.0226328	46 Information and Computing Sciences; 4608 Human-Centred Computing; 52 Psychology
10.1371/journal.pone.0226297	52 Psychology; 5202 Biological Psychology
10.1371/journal.pone.0226293	32 Biomedical and Clinical Sciences; 42 Health Sciences; 4206 Public Health
10.1371/journal.pone.0226287	32 Biomedical and Clinical Sciences; 3202 Clinical Sciences
10.1371/journal.pone.0226284	52 Psychology; 5202 Biological Psychology; 5204 Cognitive and Computational Psychology
10.1371/journal.pone.0226283	32 Biomedical and Clinical Sciences; 42 Health Sciences; 4201 Allied Health and Rehabilitation Science
10.1371/journal.pone.0226254	31 Biological Sciences; 3103 Ecology; 3108 Plant Biology
10.1371/journal.pone.0226253	31 Biological Sciences; 3105 Genetics; 41 Environmental Sciences
10.1371/journal.pone.0226252	30 Agricultural, Veterinary and Food Sciences; 3004 Crop and Pasture Production
10.1371/journal.pone.0226221	42 Health Sciences; 4202 Epidemiology
10.1371/journal.pone.0226179	30 Agricultural, Veterinary and Food Sciences; 31 Biological Sciences; 3103 Ecology; 3105 Genetics
10.1371/journal.pone.0226175	52 Psychology; 5202 Biological Psychology
10.1371/journal.pone.0226160	32 Biomedical and Clinical Sciences; 44 Human Society; 4402 Criminology; 48 Law and Legal Studies; 4805 Legal Systems
10.1371/journal.pone.0226153	32 Biomedical and Clinical Sciences; 3202 Clinical Sciences
10.1371/journal.pone.0226135	32 Biomedical and Clinical Sciences; 52 Psychology; 5202 Biological Psychology
10.1371/journal.pone.0226132	32 Biomedical and Clinical Sciences; 3202 Clinical Sciences; 42 Health Sciences
10.1371/journal.pone.0226120	42 Health Sciences; 4203 Health Services and Systems; 4206 Public Health
10.1371/journal.pone.0226106	31 Biological Sciences; 3102 Bioinformatics and Computational Biology; 3107 Microbiology; 3108 Plant Biology
10.1371/journal.pone.0226097	32 Biomedical and Clinical Sciences; 3212 Ophthalmology and Optometry
10.1371/journal.pone.0226067	40 Engineering; 4006 Communications Engineering; 46 Information and Computing Sciences; 4603 Computer Vision and Multimedia Computation
10.1371/journal.pone.0226060	40 Engineering; 4003 Biomedical Engineering; 42 Health Sciences; 4201 Allied Health and Rehabilitation Science; 4207 Sports Science and Exercise
10.1371/journal.pone.0226040	32 Biomedical and Clinical Sciences; 3202 Clinical Sciences
10.1371/journal.pone.0226033	32 Biomedical and Clinical Sciences; 3201 Cardiovascular Medicine and Haematology; 3202 Clinical Sciences
10.1371/journal.pone.0226030	32 Biomedical and Clinical Sciences; 3215 Reproductive Medicine; 42 Health Sciences; 4204 Midwifery
10.1371/journal.pone.0225980	42 Health Sciences; 4206 Public Health
10.1371/journal.pone.0225967	31 Biological Sciences; 3103 Ecology; 3109 Zoology
10.1371/journal.pone.0225938	32 Biomedical and Clinical Sciences; 3211 Oncology and Carcinogenesis
10.1371/journal.pone.0225930	30 Agricultural, Veterinary and Food Sciences; 3004 Crop and Pasture Production; 31 Biological Sciences; 3103 Ecology
10.1371/journal.pone.0225929	31 Biological Sciences; 3103 Ecology; 3107 Microbiology; 37 Earth Sciences; 3705 Geology
10.1371/journal.pone.0225904	30 Agricultural, Veterinary and Food Sciences; 31 Biological Sciences; 3101 Biochemistry and Cell Biology
10.1371/journal.pone.0225895	30 Agricultural, Veterinary and Food Sciences; 3009 Veterinary Sciences
10.1371/journal.pone.0225894	42 Health Sciences; 4203 Health Services and Systems
10.1371/journal.pone.0225842	31 Biological Sciences; 3107 Microbiology; 32 Biomedical and Clinical Sciences; 3204 Immunology
10.1371/journal.pone.0225832	42 Health Sciences; 4206 Public Health
10.1371/journal.pone.0225825	32 Biomedical and Clinical Sciences; 3204 Immunology
10.1371/journal.pone.0225816	42 Health Sciences; 4203 Health Services and Systems; 4205 Nursing
10.1371/journal.pone.0225806	32 Biomedical and Clinical Sciences; 3204 Immunology; 3207 Medical Microbiology
10.1371/journal.pone.0225751	46 Information and Computing Sciences; 4605 Data Management and Data Science
10.1371/journal.pone.0225742	32 Biomedical and Clinical Sciences; 3202 Clinical Sciences; 42 Health Sciences; 4203 Health Services and Systems
10.1371/journal.pone.0225736	30 Agricultural, Veterinary and Food Sciences; 32 Biomedical and Clinical Sciences; 3210 Nutrition and Dietetics
10.1371/journal.pone.0225545	31 Biological Sciences; 3107 Microbiology; 32 Biomedical and Clinical Sciences; 3215 Reproductive Medicine
10.1371/journal.pone.0225426	46 Information and Computing Sciences; 4611 Machine Learning
10.1371/journal.pone.0225409	31 Biological Sciences; 3103 Ecology; 41 Environmental Sciences
10.1371/journal.pone.0225316	32 Biomedical and Clinical Sciences; 3202 Clinical Sciences
10.1371/journal.pone.0225313	32 Biomedical and Clinical Sciences; 3211 Oncology and Carcinogenesis
10.1371/journal.pone.0225309	30 Agricultural, Veterinary and Food Sciences; 3004 Crop and Pasture Production; 31 Biological Sciences; 3103 Ecology; 3107 Microbiology
10.1371/journal.pone.0225216	31 Biological Sciences; 3105 Genetics
10.1371/journal.pone.0225116	39 Education; 3901 Curriculum and Pedagogy
10.1371/journal.pone.0224882	52 Psychology; 5202 Biological Psychology
10.1371/journal.pone.0224830	32 Biomedical and Clinical Sciences; 3210 Nutrition and Dietetics; 42 Health Sciences; 4206 Public Health
10.1371/journal.pone.0224691	34 Chemical Sciences; 3407 Theoretical and Computational Chemistry
10.1371/journal.pone.0224652	32 Biomedical and Clinical Sciences; 3202 Clinical Sciences
10.1371/journal.pone.0224383	46 Information and Computing Sciences; 4605 Data Management and Data Science; 51 Physical Sciences
10.1371/journal.pone.0223945	52 Psychology; 5205 Social and Personality Psychology
10.1371/journal.pone.0223788	32 Biomedical and Clinical Sciences; 3212 Ophthalmology and Optometry
10.1371/journal.pone.0223680	31 Biological Sciences; 3107 Microbiology
10.1371/journal.pone.0223294	31 Biological Sciences; 3103 Ecology; 3107 Microbiology
10.1371/journal.pone.0222517	30 Agricultural, Veterinary and Food Sciences; 3006 Food Sciences
10.1371/journal.pone.0221498	47 Language, Communication and Culture; 4704 Linguistics; 52 Psychology; 5204 Cognitive and Computational Psychology
10.1371/journal.pone.0220017	30 Agricultural, Veterinary and Food Sciences; 3004 Crop and Pasture Production; 31 Biological Sciences; 3108 Plant Biology
10.1371/journal.pone.0218497	32 Biomedical and Clinical Sciences; 3210 Nutrition and Dietetics; 42 Health Sciences; 4206 Public Health
10.1371/journal.pone.0216020	31 Biological Sciences; 3105 Genetics; 32 Biomedical and Clinical Sciences
10.1371/journal.pntd.0007905	31 Biological Sciences; 32 Biomedical and Clinical Sciences; 42 Health Sciences
10.1371/journal.pntd.0007900	31 Biological Sciences; 3105 Genetics; 32 Biomedical and Clinical Sciences; 3202 Clinical Sciences
10.1371/journal.pntd.0007852	31 Biological Sciences; 32 Biomedical and Clinical Sciences; 42 Health Sciences
10.1371/journal.pntd.0007840	42 Health Sciences; 4206 Public Health
10.1371/journal.pntd.0007419	31 Biological Sciences
10.1371/journal.pgen.1008525	31 Biological Sciences; 3101 Biochemistry and Cell Biology; 3102 Bioinformatics and Computational Biology
10.1371/journal.pgen.1008489	31 Biological Sciences; 3105 Genetics
10.1371/journal.pgen.1008414	31 Biological Sciences; 3105 Genetics
10.1371/journal.pcbi.1007537	31 Biological Sciences; 3102 Bioinformatics and Computational Biology
10.1371/journal.pcbi.1007125	46 Information and Computing Sciences; 4601 Applied Computing
10.1371/journal.pcbi.1006873	31 Biological Sciences; 3109 Zoology; 46 Information and Computing Sciences; 4602 Artificial Intelligence
10.1371/journal.pcbi.1006385	46 Information and Computing Sciences; 4608 Human-Centred Computing
10.1371/journal.pbio.3000579	31 Biological Sciences; 3107 Microbiology; 32 Biomedical and Clinical Sciences; 3207 Medical Microbiology
10.1371/journal.pbio.3000550	31 Biological Sciences; 3103 Ecology
10.1371/journal.pone.0226357	32 Biomedical and Clinical Sciences; 3201 Cardiovascular Medicine and Haematology; 3211 Oncology and Carcinogenesis
10.1371/journal.pone.0226374	32 Biomedical and Clinical Sciences; 3202 Clinical Sciences
10.1371/journal.pone.0226330	42 Health Sciences; 4203 Health Services and Systems; 4205 Nursing; 44 Human Society
10.1371/journal.pone.0226309	32 Biomedical and Clinical Sciences; 3202 Clinical Sciences
10.1371/journal.pone.0226304	32 Biomedical and Clinical Sciences; 3202 Clinical Sciences; 42 Health Sciences; 4208 Traditional, Complementary and Integrative Medicine
10.1371/journal.pone.0226301	32 Biomedical and Clinical Sciences; 3215 Reproductive Medicine; 42 Health Sciences; 4206 Public Health
10.1371/journal.pone.0226279	41 Environmental Sciences; 4105 Pollution and Contamination; 42 Health Sciences; 4202 Epidemiology
10.1371/journal.pone.0226276	32 Biomedical and Clinical Sciences; 3202 Clinical Sciences
10.1371/journal.pone.0226269	42 Health Sciences; 44 Human Society; 4403 Demography
10.1371/journal.pone.0226268	32 Biomedical and Clinical Sciences; 3202 Clinical Sciences; 42 Health Sciences; 4203 Health Services and Systems; 4206 Public Health
10.1371/journal.pone.0226257	52 Psychology; 5201 Applied and Developmental Psychology
10.1371/journal.pone.0226249	32 Biomedical and Clinical Sciences; 3208 Medical Physiology; 51 Physical Sciences
10.1371/journal.pone.0226243	31 Biological Sciences; 3107 Microbiology
10.1371/journal.pone.0226225	31 Biological Sciences; 3103 Ecology; 3104 Evolutionary Biology; 3105 Genetics
10.1371/journal.pone.0226216	42 Health Sciences; 4207 Sports Science and Exercise
10.1371/journal.pone.0226212	32 Biomedical and Clinical Sciences; 3201 Cardiovascular Medicine and Haematology
10.1371/journal.pone.0226192	30 Agricultural, Veterinary and Food Sciences; 3009 Veterinary Sciences; 34 Chemical Sciences; 3404 Medicinal and Biomolecular Chemistry
10.1371/journal.pone.0226159	31 Biological Sciences; 3103 Ecology; 3107 Microbiology; 41 Environmental Sciences
10.1371/journal.pone.0226131	42 Health Sciences; 4203 Health Services and Systems; 4206 Public Health; 44 Human Society
10.1371/journal.pone.0226129	32 Biomedical and Clinical Sciences; 3201 Cardiovascular Medicine and Haematology
10.1371/journal.pone.0226096	44 Human Society; 4403 Demography
10.1371/journal.pone.0226068	31 Biological Sciences; 3107 Microbiology; 32 Biomedical and Clinical Sciences; 3207 Medical Microbiology
10.1371/journal.pone.0226028	46 Information and Computing Sciences; 4611 Machine Learning
10.1371/journal.pone.0226022	31 Biological Sciences; 3105 Genetics; 32 Biomedical and Clinical Sciences
10.1371/journal.pone.0225977	31 Biological Sciences; 3101 Biochemistry and Cell Biology
10.1371/journal.pone.0225960	32 Biomedical and Clinical Sciences; 3212 Ophthalmology and Optometry
10.1371/journal.pone.0225959	32 Biomedical and Clinical Sciences; 3202 Clinical Sciences; 3211 Oncology and Carcinogenesis
10.1371/journal.pone.0225950	40 Engineering; 4003 Biomedical Engineering
10.1371/journal.pone.0225934	52 Psychology; 5204 Cognitive and Computational Psychology
10.1371/journal.pone.0225879	32 Biomedical and Clinical Sciences; 3202 Clinical Sciences
10.1371/journal.pone.0225878	32 Biomedical and Clinical Sciences; 3202 Clinical Sciences
10.1371/journal.pone.0225860	31 Biological Sciences; 32 Biomedical and Clinical Sciences; 3211 Oncology and Carcinogenesis
10.1371/journal.pone.0225858	31 Biological Sciences; 3105 Genetics; 3107 Microbiology
10.1371/journal.pone.0225848	31 Biological Sciences; 3107 Microbiology; 32 Biomedical and Clinical Sciences; 3202 Clinical Sciences
10.1371/journal.pone.0225828	43 History, Heritage and Archaeology; 4301 Archaeology; 4303 Historical Studies; 44 Human Society
10.1371/journal.pone.0225827	49 Mathematical Sciences; 4905 Statistics
10.1371/journal.pone.0225623	47 Language, Communication and Culture; 4704 Linguistics; 52 Psychology; 5202 Biological Psychology; 5204 Cognitive and Computational Psychology
10.1371/journal.pone.0225608	52 Psychology; 5201 Applied and Developmental Psychology; 5202 Biological Psychology; 5203 Clinical and Health Psychology
10.1371/journal.pone.0225555	30 Agricultural, Veterinary and Food Sciences; 3004 Crop and Pasture Production
10.1371/journal.pone.0225512	32 Biomedical and Clinical Sciences; 3204 Immunology
10.1371/journal.pone.0225502	31 Biological Sciences; 3103 Ecology; 3104 Evolutionary Biology; 37 Earth Sciences; 3705 Geology
10.1371/journal.pone.0225399	47 Language, Communication and Culture; 4703 Language Studies; 4704 Linguistics
10.1371/journal.pone.0225369	43 History, Heritage and Archaeology; 4301 Archaeology; 44 Human Society; 4401 Anthropology
10.1371/journal.pone.0225026	42 Health Sciences; 4201 Allied Health and Rehabilitation Science
10.1371/journal.pone.0224850	31 Biological Sciences; 3102 Bioinformatics and Computational Biology
10.1371/journal.pone.0224744	51 Physical Sciences; 52 Psychology; 5202 Biological Psychology
10.1371/journal.pone.0224264	30 Agricultural, Veterinary and Food Sciences; 3002 Agriculture, Land and Farm Management; 3004 Crop and Pasture Production
10.1371/journal.pone.0220674	30 Agricultural, Veterinary and Food Sciences; 3004 Crop and Pasture Production
10.1371/journal.pone.0220586	31 Biological Sciences; 3107 Microbiology; 32 Biomedical and Clinical Sciences; 3202 Clinical Sciences; 3207 Medical Microbiology
10.1371/journal.pone.0219636	46 Information and Computing Sciences; 4605 Data Management and Data Science
10.1371/journal.pone.0219635	31 Biological Sciences; 3107 Microbiology
10.1371/journal.pone.0219235	31 Biological Sciences; 3107 Microbiology
10.1371/journal.pone.0217809	41 Environmental Sciences; 4101 Climate Change Impacts and Adaptation
10.1371/journal.pntd.0007824	32 Biomedical and Clinical Sciences
10.1371/journal.pntd.0007819	32 Biomedical and Clinical Sciences; 3207 Medical Microbiology
10.1371/journal.pmed.1003003	32 Biomedical and Clinical Sciences; 3202 Clinical Sciences
10.1371/journal.pcbi.1007485	31 Biological Sciences; 3101 Biochemistry and Cell Biology; 32 Biomedical and Clinical Sciences; 3211 Oncology and Carcinogenesis
10.1371/journal.pcbi.1007459	31 Biological Sciences; 3101 Biochemistry and Cell Biology
10.1371/journal.pbio.3000557	31 Biological Sciences; 3101 Biochemistry and Cell Biology; 32 Biomedical and Clinical Sciences
10.1371/journal.pone.0226264	32 Biomedical and Clinical Sciences; 3215 Reproductive Medicine
10.1371/journal.pone.0225082	31 Biological Sciences; 32 Biomedical and Clinical Sciences; 3211 Oncology and Carcinogenesis
10.1371/journal.pone.0226091	30 Agricultural, Veterinary and Food Sciences; 3009 Veterinary Sciences; 31 Biological Sciences
10.1371/journal.pone.0225927	30 Agricultural, Veterinary and Food Sciences; 40 Engineering; 4013 Geomatic Engineering; 41 Environmental Sciences
10.1371/journal.pone.0226034	32 Biomedical and Clinical Sciences; 3202 Clinical Sciences; 42 Health Sciences
10.1371/journal.pone.0225556	32 Biomedical and Clinical Sciences; 3202 Clinical Sciences
10.1371/journal.pone.0226073	32 Biomedical and Clinical Sciences; 3205 Medical Biochemistry and Metabolomics; 34 Chemical Sciences; 3401 Analytical Chemistry
10.1371/journal.pone.0226303	32 Biomedical and Clinical Sciences; 3213 Paediatrics
10.1371/journal.pone.0226005	32 Biomedical and Clinical Sciences; 3202 Clinical Sciences
10.1371/journal.pone.0226380	31 Biological Sciences; 3101 Biochemistry and Cell Biology; 32 Biomedical and Clinical Sciences; 3209 Neurosciences
10.1371/journal.pone.0220072	32 Biomedical and Clinical Sciences; 3202 Clinical Sciences; 3207 Medical Microbiology; 42 Health Sciences; 4206 Public Health
10.1371/journal.pone.0226150	32 Biomedical and Clinical Sciences; 3202 Clinical Sciences; 3211 Oncology and Carcinogenesis; 42 Health Sciences; 4203 Health Services and Systems
10.1371/journal.pone.0225611	32 Biomedical and Clinical Sciences; 3204 Immunology
10.1371/journal.pone.0220596	31 Biological Sciences; 3109 Zoology
10.1371/journal.pone.0224457	32 Biomedical and Clinical Sciences; 3202 Clinical Sciences
10.1371/journal.pone.0225219	32 Biomedical and Clinical Sciences; 3202 Clinical Sciences; 3207 Medical Microbiology
10.1371/journal.pmed.1002984	32 Biomedical and Clinical Sciences; 3215 Reproductive Medicine; 42 Health Sciences; 4204 Midwifery; 4206 Public Health
10.1371/journal.pone.0226207	31 Biological Sciences; 3103 Ecology; 37 Earth Sciences
10.1371/journal.pone.0225893	32 Biomedical and Clinical Sciences; 42 Health Sciences; 4206 Public Health
10.1371/journal.pone.0225365	32 Biomedical and Clinical Sciences; 3202 Clinical Sciences
10.1371/journal.pone.0218147	32 Biomedical and Clinical Sciences; 3214 Pharmacology and Pharmaceutical Sciences
10.1371/journal.pone.0226081	42 Health Sciences; 4203 Health Services and Systems
10.1371/journal.pone.0226107	31 Biological Sciences; 3102 Bioinformatics and Computational Biology
10.1371/journal.pone.0226291	32 Biomedical and Clinical Sciences; 3202 Clinical Sciences
10.1371/journal.pmed.1002982	42 Health Sciences; 4202 Epidemiology; 4203 Health Services and Systems
10.1371/journal.pone.0226146	30 Agricultural, Veterinary and Food Sciences; 3009 Veterinary Sciences; 32 Biomedical and Clinical Sciences
10.1371/journal.pone.0226109	32 Biomedical and Clinical Sciences; 3202 Clinical Sciences; 3209 Neurosciences; 42 Health Sciences
10.1371/journal.pone.0226213	46 Information and Computing Sciences; 52 Psychology; 5203 Clinical and Health Psychology
10.1371/journal.pone.0225993	39 Education; 3904 Specialist Studies In Education
10.1371/journal.pone.0226137	32 Biomedical and Clinical Sciences; 3207 Medical Microbiology
10.1371/journal.pone.0226369	32 Biomedical and Clinical Sciences; 3202 Clinical Sciences
10.1371/journal.pone.0225779	31 Biological Sciences; 3105 Genetics; 32 Biomedical and Clinical Sciences; 42 Health Sciences; 4202 Epidemiology
10.1371/journal.pone.0220265	32 Biomedical and Clinical Sciences; 3202 Clinical Sciences; 3207 Medical Microbiology
10.1371/journal.pone.0226166	42 Health Sciences; 4206 Public Health; 52 Psychology
10.1371/journal.pone.0214351	32 Biomedical and Clinical Sciences; 3209 Neurosciences
10.1371/journal.pone.0225621	31 Biological Sciences; 3105 Genetics; 32 Biomedical and Clinical Sciences
10.1371/journal.pone.0226292	32 Biomedical and Clinical Sciences; 3202 Clinical Sciences
10.1371/journal.pone.0226282	32 Biomedical and Clinical Sciences; 3202 Clinical Sciences
10.1371/journal.pone.0216853	30 Agricultural, Veterinary and Food Sciences; 31 Biological Sciences; 3107 Microbiology
10.1371/journal.pone.0220426	31 Biological Sciences; 3103 Ecology
10.1371/journal.pone.0226163	32 Biomedical and Clinical Sciences; 40 Engineering; 4003 Biomedical Engineering
10.1371/journal.pone.0216511	30 Agricultural, Veterinary and Food Sciences; 44 Human Society; 4406 Human Geography
10.1371/journal.pone.0225954	31 Biological Sciences; 3107 Microbiology
10.1371/journal.ppat.1008177	32 Biomedical and Clinical Sciences; 3204 Immunology; 3207 Medical Microbiology
10.1371/journal.pone.0225743	30 Agricultural, Veterinary and Food Sciences; 3004 Crop and Pasture Production; 41 Environmental Sciences
10.1371/journal.pone.0215415	32 Biomedical and Clinical Sciences; 3202 Clinical Sciences; 42 Health Sciences; 4203 Health Services and Systems
10.1371/journal.pone.0225925	32 Biomedical and Clinical Sciences; 52 Psychology; 5202 Biological Psychology
10.1371/journal.pone.0225021	31 Biological Sciences; 3101 Biochemistry and Cell Biology; 32 Biomedical and Clinical Sciences; 3202 Clinical Sciences; 3204 Immunology
10.1371/journal.pone.0225765	32 Biomedical and Clinical Sciences; 3202 Clinical Sciences; 3207 Medical Microbiology
10.1371/journal.pone.0226242	30 Agricultural, Veterinary and Food Sciences; 3009 Veterinary Sciences; 31 Biological Sciences
10.1371/journal.pone.0226007	32 Biomedical and Clinical Sciences; 3202 Clinical Sciences
10.1371/journal.pone.0226197	31 Biological Sciences; 3101 Biochemistry and Cell Biology
10.1371/journal.pone.0226086	32 Biomedical and Clinical Sciences; 3212 Ophthalmology and Optometry; 42 Health Sciences; 4201 Allied Health and Rehabilitation Science
10.1371/journal.pone.0226267	32 Biomedical and Clinical Sciences; 3203 Dentistry
10.1371/journal.pone.0216018	32 Biomedical and Clinical Sciences; 3202 Clinical Sciences
10.1371/journal.pone.0226271	52 Psychology; 5203 Clinical and Health Psychology
10.1371/journal.pone.0225834	30 Agricultural, Veterinary and Food Sciences; 31 Biological Sciences; 3105 Genetics
10.1371/journal.pbio.3000560	31 Biological Sciences; 3108 Plant Biology
10.1371/journal.pone.0226110	42 Health Sciences; 4203 Health Services and Systems; 4205 Nursing
10.1371/journal.pcbi.1007360	46 Information and Computing Sciences; 4611 Machine Learning; 51 Physical Sciences
10.1371/journal.pone.0225706	35 Commerce, Management, Tourism and Services; 3507 Strategy, Management and Organisational Behaviour; 50 Philosophy and Religious Studies; 5001 Applied Ethics
10.1371/journal.ppat.1008139	31 Biological Sciences; 3101 Biochemistry and Cell Biology
10.1371/journal.pone.0226126	31 Biological Sciences; 3107 Microbiology; 32 Biomedical and Clinical Sciences; 3207 Medical Microbiology
10.1371/journal.pone.0222971	32 Biomedical and Clinical Sciences; 3202 Clinical Sciences; 3210 Nutrition and Dietetics; 42 Health Sciences; 4206 Public Health
10.1371/journal.pone.0226012	34 Chemical Sciences; 3401 Analytical Chemistry
10.1371/journal.pone.0226285	32 Biomedical and Clinical Sciences; 3202 Clinical Sciences; 3211 Oncology and Carcinogenesis
10.1371/journal.pone.0225428	32 Biomedical and Clinical Sciences; 3202 Clinical Sciences; 3207 Medical Microbiology
10.1371/journal.pcbi.1007543	31 Biological Sciences; 3102 Bioinformatics and Computational Biology; 3105 Genetics; 32 Biomedical and Clinical Sciences; 3206 Medical Biotechnology
10.1371/journal.pone.0225708	30 Agricultural, Veterinary and Food Sciences; 3002 Agriculture, Land and Farm Management
10.1371/journal.pone.0225010	31 Biological Sciences; 3105 Genetics; 32 Biomedical and Clinical Sciences; 3212 Ophthalmology and Optometry
10.1371/journal.pcbi.1007527	31 Biological Sciences; 3102 Bioinformatics and Computational Biology; 3105 Genetics
10.1371/journal.pgen.1008514	31 Biological Sciences; 3101 Biochemistry and Cell Biology
10.1371/journal.pntd.0007930	31 Biological Sciences; 3105 Genetics
10.1371/journal.pmed.1002979	32 Biomedical and Clinical Sciences; 42 Health Sciences
10.1371/journal.pgen.1008494	31 Biological Sciences; 3102 Bioinformatics and Computational Biology; 3105 Genetics
10.1371/journal.pone.0224766	32 Biomedical and Clinical Sciences; 3213 Paediatrics
10.1371/journal.ppat.1008186	31 Biological Sciences; 3101 Biochemistry and Cell Biology
10.1371/journal.pone.0226152	31 Biological Sciences; 3103 Ecology
10.1371/journal.pone.0226108	32 Biomedical and Clinical Sciences; 3202 Clinical Sciences; 3207 Medical Microbiology
10.1371/journal.pone.0224075	46 Information and Computing Sciences; 4602 Artificial Intelligence; 4605 Data Management and Data Science; 4611 Machine Learning
10.1371/journal.pntd.0007906	32 Biomedical and Clinical Sciences; 3202 Clinical Sciences; 3207 Medical Microbiology
10.1371/journal.pone.0225297	32 Biomedical and Clinical Sciences; 3214 Pharmacology and Pharmaceutical Sciences
10.1371/journal.pone.0226042	32 Biomedical and Clinical Sciences; 3212 Ophthalmology and Optometry
10.1371/journal.pone.0225729	32 Biomedical and Clinical Sciences; 3206 Medical Biotechnology; 40 Engineering; 4003 Biomedical Engineering
10.1371/journal.pone.0225968	36 Creative Arts and Writing; 3602 Creative and Professional Writing; 46 Information and Computing Sciences
10.1371/journal.pntd.0007908	32 Biomedical and Clinical Sciences; 3204 Immunology
10.1371/journal.pmed.1002983	32 Biomedical and Clinical Sciences; 3202 Clinical Sciences
10.1371/journal.pone.0225811	37 Earth Sciences; 3704 Geoinformatics
10.1371/journal.pgen.1008508	31 Biological Sciences; 3101 Biochemistry and Cell Biology
10.1371/journal.pbio.3000546	32 Biomedical and Clinical Sciences; 3209 Neurosciences
10.1371/journal.ppat.1008154	31 Biological Sciences; 3102 Bioinformatics and Computational Biology; 32 Biomedical and Clinical Sciences
10.1371/journal.ppat.1008199	32 Biomedical and Clinical Sciences; 3207 Medical Microbiology
10.1371/journal.pone.0226112	46 Information and Computing Sciences; 52 Psychology; 5204 Cognitive and Computational Psychology
10.1371/journal.ppat.1008213	31 Biological Sciences; 3101 Biochemistry and Cell Biology
10.1371/journal.pone.0226019	32 Biomedical and Clinical Sciences; 42 Health Sciences; 4206 Public Health
10.1371/journal.pmed.1002988	32 Biomedical and Clinical Sciences; 3213 Paediatrics; 3215 Reproductive Medicine
10.1371/journal.pbio.3000566	31 Biological Sciences; 3101 Biochemistry and Cell Biology
10.1371/journal.ppat.1008140	32 Biomedical and Clinical Sciences; 3204 Immunology
10.1371/journal.pntd.0007882	32 Biomedical and Clinical Sciences; 3202 Clinical Sciences; 3207 Medical Microbiology
10.1371/journal.pone.0223189	32 Biomedical and Clinical Sciences; 3202 Clinical Sciences; 42 Health Sciences; 4203 Health Services and Systems; 4206 Public Health
10.1371/journal.pone.0225417	31 Biological Sciences; 3101 Biochemistry and Cell Biology
10.1371/journal.pgen.1008491	31 Biological Sciences; 3105 Genetics
10.1371/journal.pone.0225477	31 Biological Sciences; 3107 Microbiology; 41 Environmental Sciences
10.1371/journal.ppat.1008192	31 Biological Sciences; 32 Biomedical and Clinical Sciences; 3207 Medical Microbiology
10.1371/journal.pone.0226014	37 Earth Sciences; 3701 Atmospheric Sciences
10.1371/journal.ppat.1007976	32 Biomedical and Clinical Sciences; 3207 Medical Microbiology
10.1371/journal.pone.0225137	32 Biomedical and Clinical Sciences; 3204 Immunology
10.1371/journal.pone.0226205	32 Biomedical and Clinical Sciences; 3214 Pharmacology and Pharmaceutical Sciences
10.1371/journal.pone.0225777	32 Biomedical and Clinical Sciences; 3215 Reproductive Medicine
10.1371/journal.pone.0225957	30 Agricultural, Veterinary and Food Sciences; 3003 Animal Production; 31 Biological Sciences; 3107 Microbiology; 32 Biomedical and Clinical Sciences; 3202 Clinical Sciences; 3207 Medical Microbiology
10.1371/journal.ppat.1007823	31 Biological Sciences; 3107 Microbiology; 32 Biomedical and Clinical Sciences; 3207 Medical Microbiology
10.1371/journal.pone.0226090	32 Biomedical and Clinical Sciences; 3215 Reproductive Medicine
10.1371/journal.pone.0226161	40 Engineering; 4014 Manufacturing Engineering; 46 Information and Computing Sciences; 4602 Artificial Intelligence
10.1371/journal.pone.0225802	31 Biological Sciences; 3107 Microbiology; 32 Biomedical and Clinical Sciences
10.1371/journal.pone.0225790	31 Biological Sciences; 3102 Bioinformatics and Computational Biology; 32 Biomedical and Clinical Sciences
10.1371/journal.pone.0226013	42 Health Sciences; 4201 Allied Health and Rehabilitation Science
10.1371/journal.pcbi.1007311	31 Biological Sciences; 3101 Biochemistry and Cell Biology
10.1371/journal.pone.0225682	32 Biomedical and Clinical Sciences; 3202 Clinical Sciences
10.1371/journal.pcbi.1007525	31 Biological Sciences; 3102 Bioinformatics and Computational Biology
10.1371/journal.pone.0225071	32 Biomedical and Clinical Sciences; 3202 Clinical Sciences; 42 Health Sciences; 4201 Allied Health and Rehabilitation Science
10.1371/journal.pone.0226000	46 Information and Computing Sciences; 4611 Machine Learning; 52 Psychology
10.1371/journal.pone.0226145	31 Biological Sciences; 3101 Biochemistry and Cell Biology; 32 Biomedical and Clinical Sciences
10.1371/journal.ppat.1008175	31 Biological Sciences; 3101 Biochemistry and Cell Biology; 3102 Bioinformatics and Computational Biology
10.1371/journal.pone.0225699	31 Biological Sciences; 3102 Bioinformatics and Computational Biology; 3105 Genetics; 32 Biomedical and Clinical Sciences
10.1371/journal.pone.0225994	42 Health Sciences; 4206 Public Health
10.1371/journal.pone.0226104	32 Biomedical and Clinical Sciences; 3208 Medical Physiology
10.1371/journal.pone.0225051	31 Biological Sciences; 3101 Biochemistry and Cell Biology; 32 Biomedical and Clinical Sciences; 3208 Medical Physiology
10.1371/journal.pbio.3000522	31 Biological Sciences; 3101 Biochemistry and Cell Biology; 32 Biomedical and Clinical Sciences
10.1371/journal.pone.0225840	32 Biomedical and Clinical Sciences; 3202 Clinical Sciences
10.1371/journal.pone.0225703	46 Information and Computing Sciences; 52 Psychology; 5203 Clinical and Health Psychology
10.1371/journal.pone.0225906	32 Biomedical and Clinical Sciences; 3212 Ophthalmology and Optometry
10.1371/journal.pone.0225571	32 Biomedical and Clinical Sciences; 3202 Clinical Sciences
10.1371/journal.pone.0225936	31 Biological Sciences; 3103 Ecology; 41 Environmental Sciences
10.1371/journal.pone.0225975	42 Health Sciences; 4207 Sports Science and Exercise
10.1371/journal.pone.0226154	32 Biomedical and Clinical Sciences; 3214 Pharmacology and Pharmaceutical Sciences
10.1371/journal.pone.0226011	32 Biomedical and Clinical Sciences; 3202 Clinical Sciences; 42 Health Sciences; 4201 Allied Health and Rehabilitation Science
10.1371/journal.pone.0225995	32 Biomedical and Clinical Sciences; 42 Health Sciences; 4203 Health Services and Systems
10.1371/journal.pone.0226080	32 Biomedical and Clinical Sciences; 3214 Pharmacology and Pharmaceutical Sciences; 52 Psychology; 5202 Biological Psychology
10.1371/journal.pone.0220215	31 Biological Sciences; 3105 Genetics; 42 Health Sciences; 4202 Epidemiology
10.1371/journal.pone.0226023	31 Biological Sciences; 3103 Ecology; 37 Earth Sciences
10.1371/journal.pone.0225259	37 Earth Sciences; 3706 Geophysics; 40 Engineering
10.1371/journal.pntd.0007557	32 Biomedical and Clinical Sciences; 3207 Medical Microbiology
10.1371/journal.pone.0225841	32 Biomedical and Clinical Sciences; 46 Information and Computing Sciences; 4612 Software Engineering
10.1371/journal.pone.0226105	32 Biomedical and Clinical Sciences; 3207 Medical Microbiology
10.1371/journal.pone.0225913	32 Biomedical and Clinical Sciences; 34 Chemical Sciences; 3404 Medicinal and Biomolecular Chemistry
10.1371/journal.pone.0225899	30 Agricultural, Veterinary and Food Sciences; 31 Biological Sciences; 3108 Plant Biology
10.1371/journal.pone.0224040	31 Biological Sciences; 3103 Ecology; 3104 Evolutionary Biology; 3105 Genetics
10.1371/journal.pone.0226158	32 Biomedical and Clinical Sciences; 3203 Dentistry
10.1371/journal.pone.0223515	32 Biomedical and Clinical Sciences; 3202 Clinical Sciences; 42 Health Sciences; 4203 Health Services and Systems
10.1371/journal.pone.0226164	34 Chemical Sciences; 3404 Medicinal and Biomolecular Chemistry
10.1371/journal.pone.0224136	33 Built Environment and Design; 3304 Urban and Regional Planning; 35 Commerce, Management, Tourism and Services; 3509 Transportation, Logistics and Supply Chains; 37 Earth Sciences; 3704 Geoinformatics; 44 Human Society; 4406 Human Geography
10.1371/journal.pone.0225979	30 Agricultural, Veterinary and Food Sciences; 3004 Crop and Pasture Production; 3006 Food Sciences; 3008 Horticultural Production; 31 Biological Sciences; 3105 Genetics
10.1371/journal.pone.0225548	32 Biomedical and Clinical Sciences; 3202 Clinical Sciences; 42 Health Sciences; 4203 Health Services and Systems
10.1371/journal.pone.0223709	30 Agricultural, Veterinary and Food Sciences; 31 Biological Sciences; 3109 Zoology
10.1371/journal.pone.0225414	32 Biomedical and Clinical Sciences; 3202 Clinical Sciences; 42 Health Sciences; 4203 Health Services and Systems
10.1371/journal.pone.0225875	32 Biomedical and Clinical Sciences; 3202 Clinical Sciences; 3207 Medical Microbiology
10.1371/journal.pone.0226035	31 Biological Sciences; 3102 Bioinformatics and Computational Biology
10.1371/journal.pone.0225773	51 Physical Sciences; 5108 Quantum Physics
10.1371/journal.pone.0225604	31 Biological Sciences; 3101 Biochemistry and Cell Biology; 32 Biomedical and Clinical Sciences
10.1371/journal.pone.0225798	32 Biomedical and Clinical Sciences; 3210 Nutrition and Dietetics
10.1371/journal.pone.0226037	32 Biomedical and Clinical Sciences; 3202 Clinical Sciences; 42 Health Sciences; 4201 Allied Health and Rehabilitation Science
10.1371/journal.pone.0226095	31 Biological Sciences; 3103 Ecology
10.1371/journal.pntd.0007923	31 Biological Sciences; 3102 Bioinformatics and Computational Biology; 3105 Genetics; 3107 Microbiology
10.1371/journal.pone.0225826	38 Economics; 3801 Applied Economics; 52 Psychology
10.1371/journal.pone.0225715	31 Biological Sciences; 3103 Ecology
10.1371/journal.ppat.1008161	32 Biomedical and Clinical Sciences; 3204 Immunology; 3207 Medical Microbiology
10.1371/journal.pbio.3000482	31 Biological Sciences; 3109 Zoology
10.1371/journal.pone.0226168	31 Biological Sciences; 3102 Bioinformatics and Computational Biology
10.1371/journal.pone.0225027	32 Biomedical and Clinical Sciences; 3213 Paediatrics
10.1371/journal.pone.0225692	30 Agricultural, Veterinary and Food Sciences; 31 Biological Sciences; 3107 Microbiology
10.1371/journal.pone.0225928	32 Biomedical and Clinical Sciences; 3202 Clinical Sciences; 3209 Neurosciences
10.1371/journal.pone.0225795	33 Built Environment and Design; 3301 Architecture; 46 Information and Computing Sciences
10.1371/journal.pone.0225763	44 Human Society; 4405 Gender Studies
10.1371/journal.pone.0225843	30 Agricultural, Veterinary and Food Sciences; 3009 Veterinary Sciences; 31 Biological Sciences
10.1371/journal.pone.0225992	42 Health Sciences; 44 Human Society; 4406 Human Geography
10.1371/journal.pbio.3000524	30 Agricultural, Veterinary and Food Sciences; 31 Biological Sciences; 32 Biomedical and Clinical Sciences
10.1371/journal.pone.0225700	32 Biomedical and Clinical Sciences; 3202 Clinical Sciences; 42 Health Sciences
10.1371/journal.pone.0212727	31 Biological Sciences; 3103 Ecology
10.1371/journal.pone.0225377	46 Information and Computing Sciences; 4608 Human-Centred Computing; 52 Psychology
10.1371/journal.pone.0226162	32 Biomedical and Clinical Sciences; 3204 Immunology
10.1371/journal.pone.0224927	31 Biological Sciences; 3102 Bioinformatics and Computational Biology
10.1371/journal.pbio.3000242	31 Biological Sciences; 32 Biomedical and Clinical Sciences; 3205 Medical Biochemistry and Metabolomics
10.1371/journal.pone.0225443	40 Engineering; 4013 Geomatic Engineering
10.1371/journal.pone.0225759	46 Information and Computing Sciences; 4611 Machine Learning
10.1371/journal.pone.0226078	30 Agricultural, Veterinary and Food Sciences; 31 Biological Sciences; 3103 Ecology; 3109 Zoology
10.1371/journal.pone.0226018	52 Psychology; 5201 Applied and Developmental Psychology; 5202 Biological Psychology; 5204 Cognitive and Computational Psychology
10.1371/journal.pone.0226027	32 Biomedical and Clinical Sciences; 3202 Clinical Sciences; 42 Health Sciences; 4206 Public Health
10.1371/journal.pntd.0007899	32 Biomedical and Clinical Sciences; 3202 Clinical Sciences
10.1371/journal.pone.0225949	52 Psychology; 5205 Social and Personality Psychology
10.1371/journal.pone.0225593	46 Information and Computing Sciences; 4601 Applied Computing
10.1371/journal.pone.0226111	31 Biological Sciences; 3107 Microbiology
10.1371/journal.pone.0219102	31 Biological Sciences; 3102 Bioinformatics and Computational Biology
10.1371/journal.pone.0226083	30 Agricultural, Veterinary and Food Sciences; 3009 Veterinary Sciences
10.1371/journal.pone.0224899	42 Health Sciences; 4203 Health Services and Systems; 4205 Nursing
10.1371/journal.pone.0225671	32 Biomedical and Clinical Sciences; 3207 Medical Microbiology
10.1371/journal.pone.0225590	31 Biological Sciences; 3104 Evolutionary Biology; 3105 Genetics; 41 Environmental Sciences; 4103 Environmental Biotechnology
10.1371/journal.pone.0225458	31 Biological Sciences; 3106 Industrial Biotechnology; 40 Engineering; 4004 Chemical Engineering; 4011 Environmental Engineering
10.1371/journal.pone.0224930	32 Biomedical and Clinical Sciences; 3207 Medical Microbiology; 52 Psychology; 5202 Biological Psychology
10.1371/journal.pone.0225664	42 Health Sciences; 4201 Allied Health and Rehabilitation Science; 4207 Sports Science and Exercise
10.1371/journal.pone.0226116	30 Agricultural, Veterinary and Food Sciences; 3004 Crop and Pasture Production; 31 Biological Sciences; 3105 Genetics
10.1371/journal.pone.0225169	32 Biomedical and Clinical Sciences; 3209 Neurosciences; 46 Information and Computing Sciences; 4611 Machine Learning
10.1371/journal.pone.0225387	31 Biological Sciences; 3103 Ecology
10.1371/journal.pone.0225691	32 Biomedical and Clinical Sciences; 3202 Clinical Sciences; 42 Health Sciences; 4206 Public Health
10.1371/journal.pntd.0007856	32 Biomedical and Clinical Sciences; 3202 Clinical Sciences
10.1371/journal.pone.0225791	31 Biological Sciences; 3103 Ecology; 41 Environmental Sciences; 4102 Ecological Applications
10.1371/journal.pntd.0007903	32 Biomedical and Clinical Sciences; 3202 Clinical Sciences; 42 Health Sciences
10.1371/journal.pone.0225997	39 Education; 3901 Curriculum and Pedagogy; 42 Health Sciences; 4206 Public Health
10.1371/journal.pone.0226069	32 Biomedical and Clinical Sciences; 3214 Pharmacology and Pharmaceutical Sciences; 52 Psychology; 5202 Biological Psychology
10.1371/journal.pone.0226156	30 Agricultural, Veterinary and Food Sciences; 3005 Fisheries Sciences; 32 Biomedical and Clinical Sciences
10.1371/journal.pone.0222876	32 Biomedical and Clinical Sciences; 3202 Clinical Sciences
10.1371/journal.pone.0225661	32 Biomedical and Clinical Sciences; 3202 Clinical Sciences; 42 Health Sciences; 4203 Health Services and Systems
10.1371/journal.pone.0225785	31 Biological Sciences; 41 Environmental Sciences; 4104 Environmental Management
10.1371/journal.pone.0225911	32 Biomedical and Clinical Sciences; 3208 Medical Physiology
10.1371/journal.pone.0225780	34 Chemical Sciences; 3404 Medicinal and Biomolecular Chemistry
10.1371/journal.pone.0225690	40 Engineering; 46 Information and Computing Sciences; 4605 Data Management and Data Science
10.1371/journal.pone.0225991	46 Information and Computing Sciences; 4611 Machine Learning
10.1371/journal.pone.0225824	32 Biomedical and Clinical Sciences; 3202 Clinical Sciences
10.1371/journal.pone.0226118	32 Biomedical and Clinical Sciences; 3212 Ophthalmology and Optometry
10.1371/journal.pone.0225836	32 Biomedical and Clinical Sciences; 3202 Clinical Sciences; 52 Psychology
10.1371/journal.pone.0225973	32 Biomedical and Clinical Sciences; 3210 Nutrition and Dietetics; 3215 Reproductive Medicine; 42 Health Sciences; 4204 Midwifery; 4206 Public Health
10.1371/journal.pone.0225538	38 Economics; 3801 Applied Economics; 3802 Econometrics
10.1371/journal.pntd.0007817	32 Biomedical and Clinical Sciences; 3202 Clinical Sciences
10.1371/journal.ppat.1008082	32 Biomedical and Clinical Sciences; 3204 Immunology; 3207 Medical Microbiology
10.1371/journal.pone.0225753	30 Agricultural, Veterinary and Food Sciences; 3002 Agriculture, Land and Farm Management; 3004 Crop and Pasture Production; 31 Biological Sciences; 3108 Plant Biology
10.1371/journal.pntd.0007928	32 Biomedical and Clinical Sciences; 3202 Clinical Sciences; 3207 Medical Microbiology
10.1371/journal.pone.0225948	32 Biomedical and Clinical Sciences; 3208 Medical Physiology
10.1371/journal.pone.0220874	30 Agricultural, Veterinary and Food Sciences; 3009 Veterinary Sciences
10.1371/journal.pone.0224784	46 Information and Computing Sciences; 4605 Data Management and Data Science
10.1371/journal.pone.0219652	31 Biological Sciences; 3103 Ecology
10.1371/journal.pone.0225653	31 Biological Sciences; 3108 Plant Biology; 37 Earth Sciences
10.1371/journal.pone.0226099	30 Agricultural, Veterinary and Food Sciences; 31 Biological Sciences; 3107 Microbiology
10.1371/journal.pbio.3000563	31 Biological Sciences; 3101 Biochemistry and Cell Biology; 32 Biomedical and Clinical Sciences
10.1371/journal.pone.0225734	31 Biological Sciences; 3103 Ecology; 46 Information and Computing Sciences; 4601 Applied Computing
10.1371/journal.pone.0225905	32 Biomedical and Clinical Sciences; 3202 Clinical Sciences; 40 Engineering
10.1371/journal.pone.0225740	31 Biological Sciences; 3105 Genetics; 32 Biomedical and Clinical Sciences; 3211 Oncology and Carcinogenesis
10.1371/journal.pone.0226065	30 Agricultural, Veterinary and Food Sciences; 3009 Veterinary Sciences; 42 Health Sciences; 4208 Traditional, Complementary and Integrative Medicine
10.1371/journal.pone.0225951	44 Human Society; 4406 Human Geography
10.1371/journal.pone.0226140	32 Biomedical and Clinical Sciences; 3202 Clinical Sciences
10.1371/journal.pone.0225655	30 Agricultural, Veterinary and Food Sciences; 3004 Crop and Pasture Production; 31 Biological Sciences; 3108 Plant Biology; 41 Environmental Sciences; 4103 Environmental Biotechnology
10.1371/journal.pone.0225547	42 Health Sciences; 4206 Public Health
10.1371/journal.pone.0225689	44 Human Society; 4402 Criminology
10.1371/journal.pone.0225246	31 Biological Sciences; 3103 Ecology; 3104 Evolutionary Biology; 3105 Genetics
10.1371/journal.pone.0225598	32 Biomedical and Clinical Sciences; 40 Engineering; 4003 Biomedical Engineering
10.1371/journal.pone.0226127	32 Biomedical and Clinical Sciences; 3207 Medical Microbiology; 42 Health Sciences
10.1371/journal.pone.0225181	32 Biomedical and Clinical Sciences; 3201 Cardiovascular Medicine and Haematology
10.1371/journal.pone.0226009	52 Psychology; 5202 Biological Psychology
10.1371/journal.pone.0225687	32 Biomedical and Clinical Sciences; 3202 Clinical Sciences; 42 Health Sciences; 4203 Health Services and Systems; 4206 Public Health
10.1371/journal.pone.0225766	32 Biomedical and Clinical Sciences; 3201 Cardiovascular Medicine and Haematology; 51 Physical Sciences; 5105 Medical and Biological Physics
10.1371/journal.pone.0225725	42 Health Sciences; 4206 Public Health
10.1371/journal.pone.0225688	46 Information and Computing Sciences; 4604 Cybersecurity and Privacy; 4605 Data Management and Data Science; 4606 Distributed Computing and Systems Software
10.1371/journal.ppat.1008152	31 Biological Sciences; 3107 Microbiology; 32 Biomedical and Clinical Sciences; 3202 Clinical Sciences; 3207 Medical Microbiology
10.1371/journal.pone.0226079	42 Health Sciences; 4203 Health Services and Systems; 44 Human Society
10.1371/journal.pone.0226072	32 Biomedical and Clinical Sciences; 3213 Paediatrics
10.1371/journal.pone.0226071	52 Psychology; 5205 Social and Personality Psychology
10.1371/journal.pone.0226045	42 Health Sciences; 4206 Public Health
10.1371/journal.pone.0226044	52 Psychology; 5202 Biological Psychology
10.1371/journal.pone.0226031	44 Human Society; 4402 Criminology; 4409 Social Work; 48 Law and Legal Studies
10.1371/journal.pone.0226025	46 Information and Computing Sciences; 4605 Data Management and Data Science
10.1371/journal.pone.0225972	42 Health Sciences; 4201 Allied Health and Rehabilitation Science; 4207 Sports Science and Exercise
10.1371/journal.pone.0225969	32 Biomedical and Clinical Sciences; 3202 Clinical Sciences
10.1371/journal.pone.0225937	32 Biomedical and Clinical Sciences; 3208 Medical Physiology
10.1371/journal.pone.0225933	30 Agricultural, Veterinary and Food Sciences; 3004 Crop and Pasture Production; 31 Biological Sciences; 3107 Microbiology; 3108 Plant Biology
10.1371/journal.pone.0225931	31 Biological Sciences; 3101 Biochemistry and Cell Biology; 32 Biomedical and Clinical Sciences; 3211 Oncology and Carcinogenesis
10.1371/journal.pone.0225908	32 Biomedical and Clinical Sciences; 3210 Nutrition and Dietetics; 42 Health Sciences
10.1371/journal.pone.0225902	42 Health Sciences; 4207 Sports Science and Exercise
10.1371/journal.pone.0225886	30 Agricultural, Veterinary and Food Sciences; 3008 Horticultural Production
10.1371/journal.pone.0225859	31 Biological Sciences; 3103 Ecology; 41 Environmental Sciences; 4104 Environmental Management
10.1371/journal.pone.0225849	32 Biomedical and Clinical Sciences; 3202 Clinical Sciences; 3209 Neurosciences
10.1371/journal.pone.0225847	30 Agricultural, Veterinary and Food Sciences; 31 Biological Sciences; 3105 Genetics
10.1371/journal.pone.0225844	42 Health Sciences; 4203 Health Services and Systems
10.1371/journal.pone.0225812	32 Biomedical and Clinical Sciences; 42 Health Sciences; 4202 Epidemiology; 4206 Public Health
10.1371/journal.pone.0225800	31 Biological Sciences; 3107 Microbiology; 32 Biomedical and Clinical Sciences; 3202 Clinical Sciences; 3207 Medical Microbiology
10.1371/journal.pone.0225792	32 Biomedical and Clinical Sciences; 42 Health Sciences; 4202 Epidemiology
10.1371/journal.pone.0225750	30 Agricultural, Veterinary and Food Sciences; 3005 Fisheries Sciences
10.1371/journal.pone.0225748	32 Biomedical and Clinical Sciences; 3202 Clinical Sciences; 3211 Oncology and Carcinogenesis
10.1371/journal.pone.0225732	42 Health Sciences; 4202 Epidemiology; 4206 Public Health
10.1371/journal.pone.0225728	31 Biological Sciences; 3101 Biochemistry and Cell Biology
10.1371/journal.pone.0225701	31 Biological Sciences; 3107 Microbiology; 32 Biomedical and Clinical Sciences; 3207 Medical Microbiology
10.1371/journal.pone.0225686	32 Biomedical and Clinical Sciences; 3202 Clinical Sciences; 42 Health Sciences; 4201 Allied Health and Rehabilitation Science
10.1371/journal.pone.0225633	31 Biological Sciences; 3102 Bioinformatics and Computational Biology
10.1371/journal.pone.0225629	32 Biomedical and Clinical Sciences; 42 Health Sciences; 4206 Public Health
10.1371/journal.pone.0225574	31 Biological Sciences; 3102 Bioinformatics and Computational Biology
10.1371/journal.pone.0225544	32 Biomedical and Clinical Sciences; 42 Health Sciences; 4206 Public Health; 52 Psychology
10.1371/journal.pone.0225522	32 Biomedical and Clinical Sciences; 3202 Clinical Sciences; 42 Health Sciences; 4207 Sports Science and Exercise
10.1371/journal.pone.0225500	31 Biological Sciences; 3102 Bioinformatics and Computational Biology; 46 Information and Computing Sciences
10.1371/journal.pone.0225440	32 Biomedical and Clinical Sciences; 3215 Reproductive Medicine
10.1371/journal.pone.0225439	40 Engineering; 4015 Maritime Engineering
10.1371/journal.pone.0225383	30 Agricultural, Veterinary and Food Sciences; 3004 Crop and Pasture Production; 31 Biological Sciences; 3105 Genetics; 42 Health Sciences; 4202 Epidemiology
10.1371/journal.pone.0225371	42 Health Sciences; 52 Psychology; 5203 Clinical and Health Psychology
10.1371/journal.pone.0225363	42 Health Sciences; 4202 Epidemiology
10.1371/journal.pone.0225332	31 Biological Sciences; 3101 Biochemistry and Cell Biology; 32 Biomedical and Clinical Sciences
10.1371/journal.pone.0225315	35 Commerce, Management, Tourism and Services; 3504 Commercial Services; 3506 Marketing; 3508 Tourism
10.1371/journal.pone.0225305	32 Biomedical and Clinical Sciences; 3211 Oncology and Carcinogenesis; 42 Health Sciences; 4203 Health Services and Systems
10.1371/journal.pone.0225281	32 Biomedical and Clinical Sciences; 3215 Reproductive Medicine
10.1371/journal.pone.0225272	31 Biological Sciences; 3107 Microbiology; 32 Biomedical and Clinical Sciences; 3207 Medical Microbiology
10.1371/journal.pone.0225217	42 Health Sciences; 4202 Epidemiology
10.1371/journal.pone.0225193	35 Commerce, Management, Tourism and Services; 3509 Transportation, Logistics and Supply Chains
10.1371/journal.pone.0225189	44 Human Society; 4402 Criminology; 48 Law and Legal Studies; 4805 Legal Systems
10.1371/journal.pone.0225142	30 Agricultural, Veterinary and Food Sciences; 3009 Veterinary Sciences; 31 Biological Sciences
10.1371/journal.pone.0225115	30 Agricultural, Veterinary and Food Sciences; 31 Biological Sciences; 3108 Plant Biology
10.1371/journal.pone.0225049	37 Earth Sciences; 3709 Physical Geography and Environmental Geoscience
10.1371/journal.pone.0224984	32 Biomedical and Clinical Sciences; 3210 Nutrition and Dietetics; 42 Health Sciences; 4206 Public Health
10.1371/journal.pone.0224660	42 Health Sciences; 4203 Health Services and Systems
10.1371/journal.pone.0224077	43 History, Heritage and Archaeology; 4303 Historical Studies
10.1371/journal.pone.0223954	32 Biomedical and Clinical Sciences; 3202 Clinical Sciences
10.1371/journal.pone.0223188	32 Biomedical and Clinical Sciences; 3210 Nutrition and Dietetics
10.1371/journal.pone.0220272	32 Biomedical and Clinical Sciences; 3202 Clinical Sciences; 42 Health Sciences; 4206 Public Health; 44 Human Society
10.1371/journal.pone.0216023	41 Environmental Sciences; 4104 Environmental Management; 48 Law and Legal Studies; 4803 International and Comparative Law
10.1371/journal.pone.0215195	32 Biomedical and Clinical Sciences; 3215 Reproductive Medicine; 42 Health Sciences; 4203 Health Services and Systems; 4204 Midwifery; 4206 Public Health
10.1371/journal.pone.0204717	37 Earth Sciences; 3708 Oceanography
10.1371/journal.pgen.1008455	31 Biological Sciences; 3105 Genetics
10.1371/journal.pbio.3000535	31 Biological Sciences; 3101 Biochemistry and Cell Biology
10.1371/journal.ppat.1008121	32 Biomedical and Clinical Sciences; 3204 Immunology; 3207 Medical Microbiology
10.1371/journal.pone.0226010	31 Biological Sciences; 3105 Genetics; 32 Biomedical and Clinical Sciences
10.1371/journal.pone.0225978	32 Biomedical and Clinical Sciences; 3215 Reproductive Medicine
10.1371/journal.pone.0225964	52 Psychology; 5201 Applied and Developmental Psychology; 5205 Social and Personality Psychology
10.1371/journal.pone.0225962	32 Biomedical and Clinical Sciences; 3202 Clinical Sciences; 3211 Oncology and Carcinogenesis
10.1371/journal.pone.0225941	32 Biomedical and Clinical Sciences; 3202 Clinical Sciences
10.1371/journal.pone.0225940	32 Biomedical and Clinical Sciences; 3202 Clinical Sciences; 35 Commerce, Management, Tourism and Services; 3504 Commercial Services; 42 Health Sciences; 4206 Public Health; 44 Human Society
10.1371/journal.pone.0225926	30 Agricultural, Veterinary and Food Sciences; 3001 Agricultural Biotechnology; 32 Biomedical and Clinical Sciences
10.1371/journal.pone.0225891	42 Health Sciences; 4201 Allied Health and Rehabilitation Science
10.1371/journal.pone.0225876	30 Agricultural, Veterinary and Food Sciences; 31 Biological Sciences; 3108 Plant Biology
10.1371/journal.pone.0225835	31 Biological Sciences; 32 Biomedical and Clinical Sciences; 3202 Clinical Sciences
10.1371/journal.pone.0225830	32 Biomedical and Clinical Sciences; 3202 Clinical Sciences; 42 Health Sciences; 4203 Health Services and Systems; 44 Human Society
10.1371/journal.pone.0225823	32 Biomedical and Clinical Sciences; 3202 Clinical Sciences
10.1371/journal.pone.0225793	32 Biomedical and Clinical Sciences; 3202 Clinical Sciences; 3207 Medical Microbiology
10.1371/journal.pone.0225789	32 Biomedical and Clinical Sciences; 3210 Nutrition and Dietetics; 44 Human Society
10.1371/journal.pone.0225781	47 Language, Communication and Culture; 4701 Communication and Media Studies
10.1371/journal.pone.0225769	32 Biomedical and Clinical Sciences; 3212 Ophthalmology and Optometry; 42 Health Sciences; 4207 Sports Science and Exercise
10.1371/journal.pone.0225764	30 Agricultural, Veterinary and Food Sciences; 42 Health Sciences; 4203 Health Services and Systems
10.1371/journal.pone.0225735	42 Health Sciences; 4202 Epidemiology; 4206 Public Health
10.1371/journal.pone.0225731	32 Biomedical and Clinical Sciences; 3202 Clinical Sciences
10.1371/journal.pone.0225727	31 Biological Sciences; 3101 Biochemistry and Cell Biology
10.1371/journal.pone.0225693	35 Commerce, Management, Tourism and Services; 3507 Strategy, Management and Organisational Behaviour
10.1371/journal.pone.0225670	32 Biomedical and Clinical Sciences; 3202 Clinical Sciences; 39 Education; 3901 Curriculum and Pedagogy; 42 Health Sciences; 4206 Public Health
10.1371/journal.pone.0225658	30 Agricultural, Veterinary and Food Sciences; 31 Biological Sciences; 3102 Bioinformatics and Computational Biology; 32 Biomedical and Clinical Sciences; 3204 Immunology
10.1371/journal.pone.0225576	31 Biological Sciences; 32 Biomedical and Clinical Sciences; 3202 Clinical Sciences
10.1371/journal.pone.0225476	32 Biomedical and Clinical Sciences; 3207 Medical Microbiology; 3215 Reproductive Medicine
10.1371/journal.pone.0225447	46 Information and Computing Sciences; 4605 Data Management and Data Science; 51 Physical Sciences
10.1371/journal.pone.0225436	35 Commerce, Management, Tourism and Services; 3507 Strategy, Management and Organisational Behaviour; 3509 Transportation, Logistics and Supply Chains
10.1371/journal.pone.0225273	32 Biomedical and Clinical Sciences; 3214 Pharmacology and Pharmaceutical Sciences; 44 Human Society
10.1371/journal.pone.0225200	52 Psychology; 5203 Clinical and Health Psychology
10.1371/journal.pone.0225192	32 Biomedical and Clinical Sciences; 3203 Dentistry
10.1371/journal.pone.0225129	32 Biomedical and Clinical Sciences; 3205 Medical Biochemistry and Metabolomics; 3211 Oncology and Carcinogenesis; 34 Chemical Sciences; 3401 Analytical Chemistry
10.1371/journal.pone.0224980	32 Biomedical and Clinical Sciences; 3202 Clinical Sciences; 35 Commerce, Management, Tourism and Services; 3505 Human Resources and Industrial Relations; 42 Health Sciences; 4201 Allied Health and Rehabilitation Science
10.1371/journal.pone.0224828	32 Biomedical and Clinical Sciences; 42 Health Sciences; 4202 Epidemiology
10.1371/journal.pone.0224684	46 Information and Computing Sciences; 4608 Human-Centred Computing
10.1371/journal.pone.0223750	32 Biomedical and Clinical Sciences; 44 Human Society; 4409 Social Work; 52 Psychology
10.1371/journal.pone.0223042	42 Health Sciences; 4203 Health Services and Systems
10.1371/journal.pone.0222542	32 Biomedical and Clinical Sciences; 3202 Clinical Sciences; 42 Health Sciences; 4206 Public Health
10.1371/journal.pone.0217121	31 Biological Sciences; 3103 Ecology; 3108 Plant Biology; 41 Environmental Sciences; 4101 Climate Change Impacts and Adaptation
10.1371/journal.pone.0214107	32 Biomedical and Clinical Sciences; 3206 Medical Biotechnology; 40 Engineering; 4003 Biomedical Engineering
10.1371/journal.pone.0213230	31 Biological Sciences; 3108 Plant Biology; 41 Environmental Sciences; 4103 Environmental Biotechnology
10.1371/journal.pbio.3000551	31 Biological Sciences; 32 Biomedical and Clinical Sciences; 3207 Medical Microbiology
10.1371/journal.pbio.3000471	31 Biological Sciences; 3105 Genetics
10.1371/journal.ppat.1008218	32 Biomedical and Clinical Sciences; 3207 Medical Microbiology
10.1371/journal.ppat.1008209	31 Biological Sciences; 3101 Biochemistry and Cell Biology
10.1371/journal.ppat.1008207	32 Biomedical and Clinical Sciences; 3202 Clinical Sciences; 3207 Medical Microbiology
10.1371/journal.ppat.1008198	31 Biological Sciences; 3107 Microbiology; 32 Biomedical and Clinical Sciences; 3207 Medical Microbiology
10.1371/journal.ppat.1008185	31 Biological Sciences; 3101 Biochemistry and Cell Biology
10.1371/journal.ppat.1008183	32 Biomedical and Clinical Sciences; 3204 Immunology; 3207 Medical Microbiology
10.1371/journal.ppat.1008157	32 Biomedical and Clinical Sciences; 3204 Immunology; 3207 Medical Microbiology
10.1371/journal.ppat.1008156	32 Biomedical and Clinical Sciences; 3207 Medical Microbiology
10.1371/journal.ppat.1008110	31 Biological Sciences; 3108 Plant Biology
10.1371/journal.pone.0226032	32 Biomedical and Clinical Sciences; 3202 Clinical Sciences
10.1371/journal.pone.0225943	31 Biological Sciences; 3105 Genetics
10.1371/journal.pone.0225897	46 Information and Computing Sciences; 4608 Human-Centred Computing; 52 Psychology
10.1371/journal.pone.0225896	31 Biological Sciences; 3103 Ecology; 41 Environmental Sciences
10.1371/journal.pone.0225890	32 Biomedical and Clinical Sciences; 42 Health Sciences; 4206 Public Health
10.1371/journal.pone.0225887	31 Biological Sciences; 3101 Biochemistry and Cell Biology; 32 Biomedical and Clinical Sciences; 3211 Oncology and Carcinogenesis
10.1371/journal.pone.0225885	34 Chemical Sciences; 3401 Analytical Chemistry
10.1371/journal.pone.0225868	32 Biomedical and Clinical Sciences; 3208 Medical Physiology
10.1371/journal.pone.0225865	38 Economics; 41 Environmental Sciences; 4104 Environmental Management
10.1371/journal.pone.0225862	30 Agricultural, Veterinary and Food Sciences; 3007 Forestry Sciences; 31 Biological Sciences; 41 Environmental Sciences; 4105 Pollution and Contamination
10.1371/journal.pone.0225857	32 Biomedical and Clinical Sciences; 3205 Medical Biochemistry and Metabolomics
10.1371/journal.pone.0225852	30 Agricultural, Veterinary and Food Sciences; 3004 Crop and Pasture Production; 31 Biological Sciences; 3103 Ecology; 41 Environmental Sciences; 4102 Ecological Applications
10.1371/journal.pone.0225833	31 Biological Sciences; 3103 Ecology; 3107 Microbiology
10.1371/journal.pone.0225831	32 Biomedical and Clinical Sciences; 3210 Nutrition and Dietetics; 42 Health Sciences; 4206 Public Health
10.1371/journal.pone.0225829	32 Biomedical and Clinical Sciences; 3201 Cardiovascular Medicine and Haematology
10.1371/journal.pone.0225821	40 Engineering; 42 Health Sciences; 4201 Allied Health and Rehabilitation Science
10.1371/journal.pone.0225810	30 Agricultural, Veterinary and Food Sciences; 3004 Crop and Pasture Production
10.1371/journal.pone.0225784	31 Biological Sciences; 3101 Biochemistry and Cell Biology; 32 Biomedical and Clinical Sciences; 3211 Oncology and Carcinogenesis
10.1371/journal.pone.0225767	32 Biomedical and Clinical Sciences; 3207 Medical Microbiology
10.1371/journal.pone.0225761	31 Biological Sciences; 3101 Biochemistry and Cell Biology; 32 Biomedical and Clinical Sciences
10.1371/journal.pone.0225749	32 Biomedical and Clinical Sciences; 3202 Clinical Sciences; 42 Health Sciences
10.1371/journal.pone.0225739	32 Biomedical and Clinical Sciences; 3202 Clinical Sciences
10.1371/journal.pone.0225738	42 Health Sciences; 4201 Allied Health and Rehabilitation Science; 4203 Health Services and Systems; 4205 Nursing; 44 Human Society; 4409 Social Work
10.1371/journal.pone.0225711	31 Biological Sciences; 3103 Ecology; 3107 Microbiology; 3109 Zoology
10.1371/journal.pone.0225709	39 Education; 3901 Curriculum and Pedagogy
10.1371/journal.pone.0225697	31 Biological Sciences; 3107 Microbiology; 32 Biomedical and Clinical Sciences; 3202 Clinical Sciences; 3207 Medical Microbiology
10.1371/journal.pone.0225694	42 Health Sciences; 4203 Health Services and Systems; 4206 Public Health; 44 Human Society
10.1371/journal.pone.0225684	44 Human Society; 47 Language, Communication and Culture; 4702 Cultural Studies
10.1371/journal.pone.0225683	37 Earth Sciences; 3704 Geoinformatics
10.1371/journal.pone.0225654	32 Biomedical and Clinical Sciences; 3212 Ophthalmology and Optometry; 42 Health Sciences; 4201 Allied Health and Rehabilitation Science
10.1371/journal.pone.0225651	31 Biological Sciences; 3102 Bioinformatics and Computational Biology
10.1371/journal.pone.0225649	32 Biomedical and Clinical Sciences; 3210 Nutrition and Dietetics
10.1371/journal.pone.0225647	32 Biomedical and Clinical Sciences; 3215 Reproductive Medicine; 42 Health Sciences; 4201 Allied Health and Rehabilitation Science
10.1371/journal.pone.0225645	31 Biological Sciences; 3103 Ecology; 3108 Plant Biology; 41 Environmental Sciences; 4101 Climate Change Impacts and Adaptation; 4104 Environmental Management
10.1371/journal.pone.0225643	32 Biomedical and Clinical Sciences; 3212 Ophthalmology and Optometry; 3213 Paediatrics; 42 Health Sciences; 4201 Allied Health and Rehabilitation Science
10.1371/journal.pone.0225634	42 Health Sciences; 4203 Health Services and Systems; 46 Information and Computing Sciences; 4609 Information Systems
10.1371/journal.pone.0225630	31 Biological Sciences; 3103 Ecology
10.1371/journal.pone.0225613	46 Information and Computing Sciences; 4611 Machine Learning
10.1371/journal.pone.0225612	32 Biomedical and Clinical Sciences; 3201 Cardiovascular Medicine and Haematology; 3202 Clinical Sciences
10.1371/journal.pone.0225599	32 Biomedical and Clinical Sciences; 3202 Clinical Sciences; 3211 Oncology and Carcinogenesis
10.1371/journal.pone.0225577	46 Information and Computing Sciences; 4611 Machine Learning
10.1371/journal.pone.0225551	31 Biological Sciences; 3103 Ecology; 37 Earth Sciences; 41 Environmental Sciences
10.1371/journal.pone.0225546	32 Biomedical and Clinical Sciences; 3215 Reproductive Medicine; 42 Health Sciences; 4204 Midwifery
10.1371/journal.pone.0225525	32 Biomedical and Clinical Sciences; 34 Chemical Sciences; 3401 Analytical Chemistry
10.1371/journal.pone.0225519	36 Creative Arts and Writing; 3602 Creative and Professional Writing; 3604 Performing Arts; 52 Psychology; 5202 Biological Psychology
10.1371/journal.pone.0225518	46 Information and Computing Sciences; 4605 Data Management and Data Science; 4606 Distributed Computing and Systems Software
10.1371/journal.pone.0225503	42 Health Sciences; 4206 Public Health
10.1371/journal.pone.0225501	32 Biomedical and Clinical Sciences; 3203 Dentistry
10.1371/journal.pone.0225479	32 Biomedical and Clinical Sciences; 3202 Clinical Sciences
10.1371/journal.pone.0225475	34 Chemical Sciences; 3406 Physical Chemistry
10.1371/journal.pone.0225466	31 Biological Sciences; 3102 Bioinformatics and Computational Biology; 3105 Genetics
10.1371/journal.pone.0225432	38 Economics; 3801 Applied Economics
10.1371/journal.pone.0225429	32 Biomedical and Clinical Sciences; 3202 Clinical Sciences; 42 Health Sciences
10.1371/journal.pone.0225423	32 Biomedical and Clinical Sciences; 3202 Clinical Sciences
10.1371/journal.pone.0225372	30 Agricultural, Veterinary and Food Sciences; 3003 Animal Production; 31 Biological Sciences
10.1371/journal.pone.0225327	32 Biomedical and Clinical Sciences; 3211 Oncology and Carcinogenesis
10.1371/journal.pone.0225320	32 Biomedical and Clinical Sciences; 3214 Pharmacology and Pharmaceutical Sciences
10.1371/journal.pone.0225299	38 Economics; 3801 Applied Economics; 44 Human Society; 4408 Political Science
10.1371/journal.pone.0225284	46 Information and Computing Sciences; 4608 Human-Centred Computing; 52 Psychology
10.1371/journal.pone.0225282	44 Human Society; 4406 Human Geography
10.1371/journal.pone.0225212	32 Biomedical and Clinical Sciences; 42 Health Sciences; 4203 Health Services and Systems
10.1371/journal.pone.0225195	42 Health Sciences; 4207 Sports Science and Exercise
10.1371/journal.pone.0225151	31 Biological Sciences; 3105 Genetics; 32 Biomedical and Clinical Sciences
10.1371/journal.pone.0225030	31 Biological Sciences; 3105 Genetics
10.1371/journal.pone.0224997	30 Agricultural, Veterinary and Food Sciences; 3004 Crop and Pasture Production; 31 Biological Sciences; 3103 Ecology; 3108 Plant Biology
10.1371/journal.pone.0224985	44 Human Society; 4403 Demography
10.1371/journal.pone.0224963	32 Biomedical and Clinical Sciences; 3202 Clinical Sciences; 42 Health Sciences; 4203 Health Services and Systems
10.1371/journal.pone.0224939	32 Biomedical and Clinical Sciences; 42 Health Sciences; 4203 Health Services and Systems; 44 Human Society
10.1371/journal.pone.0224921	32 Biomedical and Clinical Sciences; 3202 Clinical Sciences
10.1371/journal.pone.0224901	31 Biological Sciences; 32 Biomedical and Clinical Sciences; 3209 Neurosciences
10.1371/journal.pone.0224867	32 Biomedical and Clinical Sciences; 42 Health Sciences; 4203 Health Services and Systems
10.1371/journal.pone.0224838	31 Biological Sciences; 3107 Microbiology; 32 Biomedical and Clinical Sciences
10.1371/journal.pone.0224812	32 Biomedical and Clinical Sciences; 3211 Oncology and Carcinogenesis
10.1371/journal.pone.0224789	38 Economics; 3801 Applied Economics; 44 Human Society
10.1371/journal.pone.0224669	32 Biomedical and Clinical Sciences; 3208 Medical Physiology; 51 Physical Sciences
10.1371/journal.pone.0224580	32 Biomedical and Clinical Sciences; 3202 Clinical Sciences
10.1371/journal.pone.0224517	32 Biomedical and Clinical Sciences; 3206 Medical Biotechnology
10.1371/journal.pone.0224511	42 Health Sciences; 4203 Health Services and Systems; 44 Human Society
10.1371/journal.pone.0224428	32 Biomedical and Clinical Sciences; 3205 Medical Biochemistry and Metabolomics
10.1371/journal.pone.0224397	31 Biological Sciences; 3105 Genetics
10.1371/journal.pone.0224342	30 Agricultural, Veterinary and Food Sciences; 3009 Veterinary Sciences; 31 Biological Sciences
10.1371/journal.pone.0221794	30 Agricultural, Veterinary and Food Sciences; 3009 Veterinary Sciences
10.1371/journal.pone.0221540	31 Biological Sciences; 3105 Genetics
10.1371/journal.pone.0213705	32 Biomedical and Clinical Sciences; 3210 Nutrition and Dietetics; 42 Health Sciences; 4206 Public Health
10.1371/journal.pntd.0007929	32 Biomedical and Clinical Sciences; 3202 Clinical Sciences
10.1371/journal.pntd.0007925	32 Biomedical and Clinical Sciences; 3202 Clinical Sciences; 42 Health Sciences
10.1371/journal.pntd.0007919	31 Biological Sciences; 3102 Bioinformatics and Computational Biology; 3105 Genetics
10.1371/journal.pntd.0007916	31 Biological Sciences; 32 Biomedical and Clinical Sciences; 42 Health Sciences
10.1371/journal.pntd.0007914	31 Biological Sciences
10.1371/journal.pntd.0007913	31 Biological Sciences; 3101 Biochemistry and Cell Biology
10.1371/journal.pntd.0007911	32 Biomedical and Clinical Sciences
10.1371/journal.pntd.0007885	31 Biological Sciences; 3107 Microbiology; 32 Biomedical and Clinical Sciences
10.1371/journal.pntd.0007869	31 Biological Sciences; 32 Biomedical and Clinical Sciences; 42 Health Sciences
10.1371/journal.pntd.0007490	31 Biological Sciences; 3107 Microbiology; 32 Biomedical and Clinical Sciences
10.1371/journal.pmed.1002986	32 Biomedical and Clinical Sciences; 3213 Paediatrics; 42 Health Sciences; 4206 Public Health
10.1371/journal.pmed.1002980	32 Biomedical and Clinical Sciences; 3215 Reproductive Medicine; 42 Health Sciences; 4202 Epidemiology; 4204 Midwifery
10.1371/journal.pgen.1008217	31 Biological Sciences; 3101 Biochemistry and Cell Biology
10.1371/journal.pcbi.1007545	32 Biomedical and Clinical Sciences; 3209 Neurosciences; 46 Information and Computing Sciences
10.1371/journal.pcbi.1007538	31 Biological Sciences; 3102 Bioinformatics and Computational Biology; 32 Biomedical and Clinical Sciences; 3211 Oncology and Carcinogenesis
10.1371/journal.pcbi.1007510	31 Biological Sciences; 3102 Bioinformatics and Computational Biology
10.1371/journal.pcbi.1007508	31 Biological Sciences; 3101 Biochemistry and Cell Biology
10.1371/journal.pcbi.1007455	32 Biomedical and Clinical Sciences; 3209 Neurosciences
10.1371/journal.pcbi.1007204	31 Biological Sciences; 3102 Bioinformatics and Computational Biology
10.1371/journal.pcbi.1006964	52 Psychology; 5204 Cognitive and Computational Psychology
10.1371/journal.pbio.3000554	31 Biological Sciences; 3101 Biochemistry and Cell Biology
10.1371/journal.pone.0225726	31 Biological Sciences; 3107 Microbiology; 32 Biomedical and Clinical Sciences; 3202 Clinical Sciences; 3207 Medical Microbiology
10.1371/journal.pone.0225495	42 Health Sciences; 46 Information and Computing Sciences; 4609 Information Systems
10.1371/journal.pone.0224791	32 Biomedical and Clinical Sciences; 42 Health Sciences; 4203 Health Services and Systems; 4206 Public Health
10.1371/journal.pone.0225718	52 Psychology; 5202 Biological Psychology; 5204 Cognitive and Computational Psychology
10.1371/journal.pone.0225529	52 Psychology; 5205 Social and Personality Psychology
10.1371/journal.pone.0225143	31 Biological Sciences; 37 Earth Sciences; 3709 Physical Geography and Environmental Geoscience; 43 History, Heritage and Archaeology; 4301 Archaeology
10.1371/journal.pone.0224499	32 Biomedical and Clinical Sciences; 3202 Clinical Sciences; 52 Psychology
10.1371/journal.pone.0225787	32 Biomedical and Clinical Sciences; 3214 Pharmacology and Pharmaceutical Sciences
10.1371/journal.pone.0225610	31 Biological Sciences; 3103 Ecology
10.1371/journal.pone.0225646	52 Psychology; 5203 Clinical and Health Psychology; 5205 Social and Personality Psychology
10.1371/journal.pone.0225770	39 Education; 3903 Education Systems; 3904 Specialist Studies In Education
10.1371/journal.pone.0225569	32 Biomedical and Clinical Sciences; 42 Health Sciences; 4206 Public Health
10.1371/journal.pone.0225760	32 Biomedical and Clinical Sciences; 3204 Immunology; 3207 Medical Microbiology
10.1371/journal.pcbi.1007495	32 Biomedical and Clinical Sciences; 3204 Immunology; 3211 Oncology and Carcinogenesis
10.1371/journal.pntd.0007861	42 Health Sciences; 4203 Health Services and Systems; 4206 Public Health
10.1371/journal.pone.0225342	31 Biological Sciences; 3103 Ecology; 3104 Evolutionary Biology; 37 Earth Sciences; 3705 Geology
10.1371/journal.pone.0224916	46 Information and Computing Sciences; 4605 Data Management and Data Science
10.1371/journal.pmed.1002968	32 Biomedical and Clinical Sciences; 3210 Nutrition and Dietetics; 42 Health Sciences; 4202 Epidemiology; 4206 Public Health
10.1371/journal.pone.0224573	43 History, Heritage and Archaeology; 4301 Archaeology; 44 Human Society; 4401 Anthropology
10.1371/journal.pone.0225542	39 Education; 3901 Curriculum and Pedagogy; 3904 Specialist Studies In Education
10.1371/journal.pone.0225584	32 Biomedical and Clinical Sciences; 3203 Dentistry
10.1371/journal.pone.0225639	42 Health Sciences; 4206 Public Health
10.1371/journal.pone.0224734	31 Biological Sciences; 3103 Ecology; 3104 Evolutionary Biology; 37 Earth Sciences; 3705 Geology
10.1371/journal.pone.0225626	42 Health Sciences; 4203 Health Services and Systems
10.1371/journal.pone.0218690	30 Agricultural, Veterinary and Food Sciences; 3002 Agriculture, Land and Farm Management; 3004 Crop and Pasture Production; 31 Biological Sciences
10.1371/journal.pone.0225065	32 Biomedical and Clinical Sciences; 42 Health Sciences; 4203 Health Services and Systems
10.1371/journal.pone.0225665	40 Engineering; 4003 Biomedical Engineering; 51 Physical Sciences
10.1371/journal.pone.0225057	31 Biological Sciences; 3105 Genetics; 3107 Microbiology; 32 Biomedical and Clinical Sciences; 3202 Clinical Sciences; 3207 Medical Microbiology
10.1371/journal.pone.0225716	32 Biomedical and Clinical Sciences; 3215 Reproductive Medicine; 42 Health Sciences; 4204 Midwifery
10.1371/journal.pone.0225837	46 Information and Computing Sciences; 4610 Library and Information Studies; 50 Philosophy and Religious Studies
10.1371/journal.pone.0225657	30 Agricultural, Veterinary and Food Sciences; 3009 Veterinary Sciences
10.1371/journal.pone.0225774	32 Biomedical and Clinical Sciences; 3215 Reproductive Medicine
10.1371/journal.pone.0217729	51 Physical Sciences; 52 Psychology; 5202 Biological Psychology
10.1371/journal.pone.0221378	32 Biomedical and Clinical Sciences; 40 Engineering; 4003 Biomedical Engineering
10.1371/journal.pone.0225702	32 Biomedical and Clinical Sciences; 3208 Medical Physiology
10.1371/journal.pone.0225176	32 Biomedical and Clinical Sciences; 3203 Dentistry
10.1371/journal.pone.0220096	40 Engineering; 4013 Geomatic Engineering
10.1371/journal.pone.0225241	31 Biological Sciences; 3102 Bioinformatics and Computational Biology
10.1371/journal.pone.0225117	31 Biological Sciences; 3103 Ecology; 43 History, Heritage and Archaeology
10.1371/journal.pone.0225776	32 Biomedical and Clinical Sciences; 3202 Clinical Sciences
10.1371/journal.pone.0225640	32 Biomedical and Clinical Sciences; 3202 Clinical Sciences
10.1371/journal.pone.0225768	30 Agricultural, Veterinary and Food Sciences; 3004 Crop and Pasture Production
10.1371/journal.pone.0225452	31 Biological Sciences; 3107 Microbiology; 32 Biomedical and Clinical Sciences
10.1371/journal.pone.0225669	35 Commerce, Management, Tourism and Services; 3503 Business Systems In Context; 3507 Strategy, Management and Organisational Behaviour; 46 Information and Computing Sciences; 4609 Information Systems
10.1371/journal.pone.0224540	32 Biomedical and Clinical Sciences; 3211 Oncology and Carcinogenesis
10.1371/journal.pone.0224325	32 Biomedical and Clinical Sciences; 3202 Clinical Sciences; 42 Health Sciences; 4203 Health Services and Systems
10.1371/journal.pone.0208872	32 Biomedical and Clinical Sciences; 42 Health Sciences; 4206 Public Health
10.1371/journal.pone.0225668	42 Health Sciences; 4203 Health Services and Systems; 4205 Nursing
10.1371/journal.pone.0224754	32 Biomedical and Clinical Sciences; 3215 Reproductive Medicine
10.1371/journal.pone.0225771	32 Biomedical and Clinical Sciences; 3201 Cardiovascular Medicine and Haematology
10.1371/journal.pone.0224817	31 Biological Sciences; 3107 Microbiology
10.1371/journal.pone.0218979	30 Agricultural, Veterinary and Food Sciences; 3003 Animal Production
10.1371/journal.pone.0225721	31 Biological Sciences; 32 Biomedical and Clinical Sciences; 3211 Oncology and Carcinogenesis
10.1371/journal.pone.0225373	30 Agricultural, Veterinary and Food Sciences; 3004 Crop and Pasture Production; 41 Environmental Sciences; 4105 Pollution and Contamination
10.1371/journal.pone.0225880	32 Biomedical and Clinical Sciences; 3202 Clinical Sciences
10.1371/journal.pone.0224814	52 Psychology; 5205 Social and Personality Psychology
10.1371/journal.pone.0224990	42 Health Sciences; 44 Human Society; 4405 Gender Studies
10.1371/journal.pone.0223248	31 Biological Sciences; 3103 Ecology; 41 Environmental Sciences; 4104 Environmental Management
10.1371/journal.pone.0225230	32 Biomedical and Clinical Sciences; 3202 Clinical Sciences; 42 Health Sciences
10.1371/journal.pone.0223095	42 Health Sciences; 4206 Public Health
10.1371/journal.pone.0225752	31 Biological Sciences; 3107 Microbiology; 32 Biomedical and Clinical Sciences; 3202 Clinical Sciences; 3211 Oncology and Carcinogenesis
10.1371/journal.pone.0225504	42 Health Sciences; 4201 Allied Health and Rehabilitation Science; 52 Psychology
10.1371/journal.pone.0225579	31 Biological Sciences; 3103 Ecology; 3109 Zoology
10.1371/journal.pone.0225128	31 Biological Sciences; 3103 Ecology; 41 Environmental Sciences; 4101 Climate Change Impacts and Adaptation
10.1371/journal.pone.0225528	31 Biological Sciences; 3103 Ecology; 3104 Evolutionary Biology; 37 Earth Sciences; 3705 Geology
10.1371/journal.pbio.3000541	31 Biological Sciences; 3101 Biochemistry and Cell Biology
10.1371/journal.pone.0225648	32 Biomedical and Clinical Sciences; 3203 Dentistry
10.1371/journal.pone.0224558	37 Earth Sciences; 3701 Atmospheric Sciences; 3707 Hydrology; 40 Engineering; 4013 Geomatic Engineering
10.1371/journal.pone.0225499	32 Biomedical and Clinical Sciences; 42 Health Sciences; 4203 Health Services and Systems
10.1371/journal.pone.0225717	32 Biomedical and Clinical Sciences; 3210 Nutrition and Dietetics
10.1371/journal.pone.0225533	30 Agricultural, Veterinary and Food Sciences; 3003 Animal Production; 3009 Veterinary Sciences
10.1371/journal.pntd.0007811	31 Biological Sciences; 32 Biomedical and Clinical Sciences; 42 Health Sciences
10.1371/journal.pone.0225606	32 Biomedical and Clinical Sciences; 3207 Medical Microbiology
10.1371/journal.pmed.1002971	32 Biomedical and Clinical Sciences; 3210 Nutrition and Dietetics; 42 Health Sciences; 4206 Public Health
10.1371/journal.pone.0224567	32 Biomedical and Clinical Sciences; 3202 Clinical Sciences
10.1371/journal.pone.0225375	31 Biological Sciences; 3106 Industrial Biotechnology
10.1371/journal.pntd.0007774	32 Biomedical and Clinical Sciences; 3207 Medical Microbiology
10.1371/journal.pone.0225482	32 Biomedical and Clinical Sciences; 3204 Immunology
10.1371/journal.pone.0225775	31 Biological Sciences; 3101 Biochemistry and Cell Biology
10.1371/journal.pbio.3000540	31 Biological Sciences; 3101 Biochemistry and Cell Biology
10.1371/journal.pone.0225730	44 Human Society; 4407 Policy and Administration
10.1371/journal.pone.0224822	30 Agricultural, Veterinary and Food Sciences; 3009 Veterinary Sciences; 31 Biological Sciences; 3109 Zoology
10.1371/journal.pmed.1002965	32 Biomedical and Clinical Sciences; 3214 Pharmacology and Pharmaceutical Sciences; 42 Health Sciences
10.1371/journal.pone.0225737	32 Biomedical and Clinical Sciences; 3202 Clinical Sciences
10.1371/journal.pmed.1002974	32 Biomedical and Clinical Sciences; 3215 Reproductive Medicine; 42 Health Sciences; 4204 Midwifery; 4206 Public Health
10.1371/journal.pone.0225636	32 Biomedical and Clinical Sciences; 3202 Clinical Sciences
10.1371/journal.pbio.3000206	31 Biological Sciences; 32 Biomedical and Clinical Sciences; 3202 Clinical Sciences; 3207 Medical Microbiology
10.1371/journal.pone.0225460	32 Biomedical and Clinical Sciences; 3202 Clinical Sciences; 42 Health Sciences; 4206 Public Health
10.1371/journal.pone.0225508	32 Biomedical and Clinical Sciences; 3202 Clinical Sciences
10.1371/journal.pone.0225582	32 Biomedical and Clinical Sciences; 3202 Clinical Sciences; 3209 Neurosciences
10.1371/journal.pone.0225644	32 Biomedical and Clinical Sciences; 3203 Dentistry
10.1371/journal.pone.0223758	32 Biomedical and Clinical Sciences; 46 Information and Computing Sciences; 4610 Library and Information Studies
10.1371/journal.pone.0225331	30 Agricultural, Veterinary and Food Sciences; 3007 Forestry Sciences
10.1371/journal.pone.0225450	31 Biological Sciences; 3101 Biochemistry and Cell Biology; 32 Biomedical and Clinical Sciences; 3211 Oncology and Carcinogenesis
10.1371/journal.pone.0225851	31 Biological Sciences; 3107 Microbiology; 32 Biomedical and Clinical Sciences
10.1371/journal.pone.0225448	30 Agricultural, Veterinary and Food Sciences; 3003 Animal Production; 31 Biological Sciences; 3109 Zoology
10.1371/journal.pone.0225782	31 Biological Sciences; 3101 Biochemistry and Cell Biology; 32 Biomedical and Clinical Sciences
10.1371/journal.pone.0225074	32 Biomedical and Clinical Sciences; 3215 Reproductive Medicine; 42 Health Sciences; 4204 Midwifery; 4206 Public Health
10.1371/journal.pone.0224941	31 Biological Sciences; 3101 Biochemistry and Cell Biology
10.1371/journal.pone.0225534	42 Health Sciences; 4203 Health Services and Systems
10.1371/journal.pone.0225437	52 Psychology; 5202 Biological Psychology
10.1371/journal.pone.0223078	33 Built Environment and Design; 3304 Urban and Regional Planning; 35 Commerce, Management, Tourism and Services; 3509 Transportation, Logistics and Supply Chains; 44 Human Society; 4406 Human Geography
10.1371/journal.pone.0225856	32 Biomedical and Clinical Sciences; 3202 Clinical Sciences; 42 Health Sciences; 4206 Public Health
10.1371/journal.pmed.1002973	32 Biomedical and Clinical Sciences; 3214 Pharmacology and Pharmaceutical Sciences
10.1371/journal.pone.0225804	31 Biological Sciences; 3103 Ecology
10.1371/journal.pone.0225389	32 Biomedical and Clinical Sciences; 3214 Pharmacology and Pharmaceutical Sciences
10.1371/journal.pone.0223925	32 Biomedical and Clinical Sciences; 3203 Dentistry
10.1371/journal.pone.0225601	32 Biomedical and Clinical Sciences; 3202 Clinical Sciences
10.1371/journal.pone.0224942	32 Biomedical and Clinical Sciences; 3202 Clinical Sciences
10.1371/journal.pone.0219411	43 History, Heritage and Archaeology; 4301 Archaeology; 44 Human Society; 4401 Anthropology
10.1371/journal.pone.0223664	32 Biomedical and Clinical Sciences; 42 Health Sciences; 4206 Public Health
10.1371/journal.pcbi.1007454	31 Biological Sciences; 3101 Biochemistry and Cell Biology
10.1371/journal.pone.0225627	32 Biomedical and Clinical Sciences; 42 Health Sciences; 4203 Health Services and Systems
10.1371/journal.pone.0225754	32 Biomedical and Clinical Sciences; 42 Health Sciences; 4201 Allied Health and Rehabilitation Science
10.1371/journal.pone.0225307	42 Health Sciences; 4202 Epidemiology
10.1371/journal.pone.0225772	31 Biological Sciences; 3103 Ecology; 3109 Zoology
10.1371/journal.pone.0225473	32 Biomedical and Clinical Sciences; 3201 Cardiovascular Medicine and Haematology; 3202 Clinical Sciences
10.1371/journal.pmed.1002954	32 Biomedical and Clinical Sciences; 42 Health Sciences; 4206 Public Health
10.1371/journal.ppat.1008194	31 Biological Sciences; 3101 Biochemistry and Cell Biology; 3107 Microbiology; 32 Biomedical and Clinical Sciences; 3202 Clinical Sciences; 3207 Medical Microbiology
10.1371/journal.ppat.1008122	32 Biomedical and Clinical Sciences; 3204 Immunology
10.1371/journal.pone.0225803	42 Health Sciences; 4207 Sports Science and Exercise
10.1371/journal.pone.0225801	31 Biological Sciences; 3101 Biochemistry and Cell Biology; 32 Biomedical and Clinical Sciences; 3215 Reproductive Medicine
10.1371/journal.pone.0225778	32 Biomedical and Clinical Sciences; 3202 Clinical Sciences
10.1371/journal.pone.0225741	32 Biomedical and Clinical Sciences; 42 Health Sciences; 4206 Public Health
10.1371/journal.pone.0225667	32 Biomedical and Clinical Sciences; 42 Health Sciences; 4203 Health Services and Systems; 4206 Public Health
10.1371/journal.pone.0225659	30 Agricultural, Veterinary and Food Sciences; 3006 Food Sciences
10.1371/journal.pone.0225656	31 Biological Sciences; 3105 Genetics; 32 Biomedical and Clinical Sciences; 42 Health Sciences
10.1371/journal.pone.0225625	32 Biomedical and Clinical Sciences; 52 Psychology; 5202 Biological Psychology
10.1371/journal.pone.0225586	32 Biomedical and Clinical Sciences; 3202 Clinical Sciences; 3209 Neurosciences
10.1371/journal.pone.0225578	31 Biological Sciences; 3105 Genetics
10.1371/journal.pone.0225567	30 Agricultural, Veterinary and Food Sciences; 3007 Forestry Sciences; 31 Biological Sciences; 3103 Ecology
10.1371/journal.pone.0225539	32 Biomedical and Clinical Sciences; 3202 Clinical Sciences; 3213 Paediatrics
10.1371/journal.pone.0225509	32 Biomedical and Clinical Sciences; 3211 Oncology and Carcinogenesis
10.1371/journal.pone.0225507	31 Biological Sciences; 3103 Ecology; 3109 Zoology; 41 Environmental Sciences
10.1371/journal.pone.0225471	32 Biomedical and Clinical Sciences; 42 Health Sciences; 4207 Sports Science and Exercise
10.1371/journal.pone.0225467	32 Biomedical and Clinical Sciences; 42 Health Sciences; 4201 Allied Health and Rehabilitation Science; 4203 Health Services and Systems
10.1371/journal.pone.0225435	32 Biomedical and Clinical Sciences; 3213 Paediatrics
10.1371/journal.pone.0225431	32 Biomedical and Clinical Sciences; 42 Health Sciences; 4203 Health Services and Systems; 4206 Public Health
10.1371/journal.pone.0225422	32 Biomedical and Clinical Sciences; 3213 Paediatrics
10.1371/journal.pone.0225412	32 Biomedical and Clinical Sciences; 44 Human Society; 4403 Demography
10.1371/journal.pone.0225334	32 Biomedical and Clinical Sciences; 3215 Reproductive Medicine; 42 Health Sciences; 4204 Midwifery
10.1371/journal.pone.0225333	32 Biomedical and Clinical Sciences; 3215 Reproductive Medicine; 44 Human Society
10.1371/journal.pone.0225242	32 Biomedical and Clinical Sciences; 3202 Clinical Sciences; 3211 Oncology and Carcinogenesis
10.1371/journal.pone.0225240	42 Health Sciences; 4203 Health Services and Systems; 4205 Nursing
10.1371/journal.pone.0225171	30 Agricultural, Veterinary and Food Sciences; 3005 Fisheries Sciences; 41 Environmental Sciences; 4105 Pollution and Contamination
10.1371/journal.pone.0225076	32 Biomedical and Clinical Sciences; 3202 Clinical Sciences; 42 Health Sciences; 4206 Public Health
10.1371/journal.pone.0225055	33 Built Environment and Design; 3302 Building; 34 Chemical Sciences; 3403 Macromolecular and Materials Chemistry; 40 Engineering; 4005 Civil Engineering
10.1371/journal.pone.0224890	32 Biomedical and Clinical Sciences; 3211 Oncology and Carcinogenesis
10.1371/journal.pone.0224877	32 Biomedical and Clinical Sciences; 3202 Clinical Sciences; 3207 Medical Microbiology
10.1371/journal.pone.0224873	32 Biomedical and Clinical Sciences; 3202 Clinical Sciences; 3211 Oncology and Carcinogenesis; 51 Physical Sciences; 5105 Medical and Biological Physics
10.1371/journal.pone.0224492	40 Engineering; 4014 Manufacturing Engineering
10.1371/journal.pone.0224379	31 Biological Sciences; 3102 Bioinformatics and Computational Biology; 3105 Genetics; 32 Biomedical and Clinical Sciences; 3202 Clinical Sciences; 3211 Oncology and Carcinogenesis
10.1371/journal.pone.0224361	42 Health Sciences; 4203 Health Services and Systems; 4206 Public Health; 44 Human Society; 4409 Social Work
10.1371/journal.pone.0224243	31 Biological Sciences; 32 Biomedical and Clinical Sciences; 3209 Neurosciences
10.1371/journal.pone.0224144	37 Earth Sciences; 3701 Atmospheric Sciences
10.1371/journal.pone.0224137	32 Biomedical and Clinical Sciences; 3202 Clinical Sciences
10.1371/journal.pone.0220423	32 Biomedical and Clinical Sciences; 3202 Clinical Sciences
10.1371/journal.pone.0219875	42 Health Sciences; 4203 Health Services and Systems
10.1371/journal.pone.0214346	30 Agricultural, Veterinary and Food Sciences; 3003 Animal Production; 31 Biological Sciences; 3105 Genetics
10.1371/journal.pntd.0007896	32 Biomedical and Clinical Sciences; 3202 Clinical Sciences
10.1371/journal.pntd.0007863	32 Biomedical and Clinical Sciences; 42 Health Sciences; 4203 Health Services and Systems
10.1371/journal.pntd.0007837	32 Biomedical and Clinical Sciences; 3204 Immunology; 3207 Medical Microbiology
10.1371/journal.pntd.0007836	32 Biomedical and Clinical Sciences; 3202 Clinical Sciences; 42 Health Sciences
10.1371/journal.pntd.0007829	32 Biomedical and Clinical Sciences; 3202 Clinical Sciences
10.1371/journal.pntd.0007488	32 Biomedical and Clinical Sciences; 3202 Clinical Sciences
10.1371/journal.pntd.0007242	32 Biomedical and Clinical Sciences; 3202 Clinical Sciences; 3207 Medical Microbiology
10.1371/journal.pgen.1008510	31 Biological Sciences; 3107 Microbiology
10.1371/journal.pgen.1008485	31 Biological Sciences; 3105 Genetics
10.1371/journal.pgen.1008480	31 Biological Sciences; 3105 Genetics
10.1371/journal.pgen.1008459	31 Biological Sciences; 3101 Biochemistry and Cell Biology
10.1371/journal.pgen.1008427	31 Biological Sciences; 3101 Biochemistry and Cell Biology
10.1371/journal.pgen.1008426	31 Biological Sciences; 3105 Genetics
10.1371/journal.pcbi.1007520	31 Biological Sciences; 3102 Bioinformatics and Computational Biology
10.1371/journal.pcbi.1007517	46 Information and Computing Sciences; 4605 Data Management and Data Science
10.1371/journal.pcbi.1007496	31 Biological Sciences; 3102 Bioinformatics and Computational Biology
10.1371/journal.pcbi.1007249	34 Chemical Sciences; 3404 Medicinal and Biomolecular Chemistry; 42 Health Sciences; 4208 Traditional, Complementary and Integrative Medicine
10.1371/journal.pbio.3000556	31 Biological Sciences; 3103 Ecology
10.1371/journal.pone.0225597	31 Biological Sciences; 3103 Ecology; 3109 Zoology; 41 Environmental Sciences
10.1371/journal.pntd.0007822	32 Biomedical and Clinical Sciences; 3202 Clinical Sciences
10.1371/journal.pone.0225537	32 Biomedical and Clinical Sciences; 3202 Clinical Sciences; 3211 Oncology and Carcinogenesis
10.1371/journal.pone.0225580	32 Biomedical and Clinical Sciences; 3201 Cardiovascular Medicine and Haematology
10.1371/journal.pone.0225632	30 Agricultural, Veterinary and Food Sciences; 3004 Crop and Pasture Production
10.1371/journal.pone.0225258	32 Biomedical and Clinical Sciences; 3213 Paediatrics
10.1371/journal.pone.0225724	42 Health Sciences; 4206 Public Health
10.1371/journal.pone.0225303	32 Biomedical and Clinical Sciences; 42 Health Sciences; 4203 Health Services and Systems
10.1371/journal.pone.0225385	44 Human Society; 4405 Gender Studies; 47 Language, Communication and Culture; 4705 Literary Studies
10.1371/journal.pone.0225220	39 Education; 3901 Curriculum and Pedagogy; 42 Health Sciences; 4206 Public Health
10.1371/journal.pcbi.1007486	32 Biomedical and Clinical Sciences; 3202 Clinical Sciences
10.1371/journal.pone.0214976	40 Engineering; 4004 Chemical Engineering; 4011 Environmental Engineering
10.1371/journal.pone.0225468	31 Biological Sciences; 3101 Biochemistry and Cell Biology; 32 Biomedical and Clinical Sciences
10.1371/journal.pone.0225474	34 Chemical Sciences; 3401 Analytical Chemistry
10.1371/journal.pntd.0007825	31 Biological Sciences; 3107 Microbiology; 32 Biomedical and Clinical Sciences; 3202 Clinical Sciences
10.1371/journal.pone.0225587	51 Physical Sciences; 5106 Nuclear and Plasma Physics; 5110 Synchrotrons and Accelerators
10.1371/journal.pone.0225270	32 Biomedical and Clinical Sciences; 3202 Clinical Sciences; 42 Health Sciences; 4203 Health Services and Systems
10.1371/journal.pone.0225445	47 Language, Communication and Culture; 4704 Linguistics; 52 Psychology
10.1371/journal.pone.0225395	32 Biomedical and Clinical Sciences; 3202 Clinical Sciences; 44 Human Society
10.1371/journal.pone.0221988	30 Agricultural, Veterinary and Food Sciences; 3009 Veterinary Sciences
10.1371/journal.pone.0225138	32 Biomedical and Clinical Sciences; 40 Engineering; 4003 Biomedical Engineering; 46 Information and Computing Sciences; 4611 Machine Learning
10.1371/journal.pcbi.1007509	31 Biological Sciences; 3102 Bioinformatics and Computational Biology; 3105 Genetics
10.1371/journal.pone.0225685	32 Biomedical and Clinical Sciences; 3211 Oncology and Carcinogenesis; 42 Health Sciences
10.1371/journal.pone.0225511	31 Biological Sciences; 32 Biomedical and Clinical Sciences; 3211 Oncology and Carcinogenesis
10.1371/journal.pone.0225314	32 Biomedical and Clinical Sciences; 3202 Clinical Sciences; 42 Health Sciences; 4203 Health Services and Systems; 44 Human Society
10.1371/journal.pone.0225602	31 Biological Sciences; 3102 Bioinformatics and Computational Biology; 34 Chemical Sciences; 3404 Medicinal and Biomolecular Chemistry
10.1371/journal.pone.0225603	52 Psychology; 5202 Biological Psychology; 5203 Clinical and Health Psychology
10.1371/journal.pone.0225585	32 Biomedical and Clinical Sciences; 3202 Clinical Sciences
10.1371/journal.pone.0225541	32 Biomedical and Clinical Sciences; 3202 Clinical Sciences
10.1371/journal.pcbi.1007463	32 Biomedical and Clinical Sciences; 42 Health Sciences; 4207 Sports Science and Exercise
10.1371/journal.pone.0225464	31 Biological Sciences; 3107 Microbiology; 32 Biomedical and Clinical Sciences; 3202 Clinical Sciences
10.1371/journal.pone.0225360	46 Information and Computing Sciences; 4610 Library and Information Studies
10.1371/journal.pone.0225427	49 Mathematical Sciences; 4905 Statistics
10.1371/journal.pone.0225550	32 Biomedical and Clinical Sciences; 3202 Clinical Sciences
10.1371/journal.pone.0225382	31 Biological Sciences; 3102 Bioinformatics and Computational Biology; 46 Information and Computing Sciences
10.1371/journal.pone.0225404	32 Biomedical and Clinical Sciences; 3202 Clinical Sciences; 3215 Reproductive Medicine
10.1371/journal.pone.0225624	32 Biomedical and Clinical Sciences; 3204 Immunology
10.1371/journal.pone.0225506	32 Biomedical and Clinical Sciences; 3207 Medical Microbiology
10.1371/journal.pone.0220421	31 Biological Sciences; 3107 Microbiology; 32 Biomedical and Clinical Sciences; 3202 Clinical Sciences
10.1371/journal.pone.0225568	30 Agricultural, Veterinary and Food Sciences; 3005 Fisheries Sciences; 41 Environmental Sciences
10.1371/journal.pone.0224071	32 Biomedical and Clinical Sciences; 3211 Oncology and Carcinogenesis; 34 Chemical Sciences; 3404 Medicinal and Biomolecular Chemistry
10.1371/journal.pone.0225386	31 Biological Sciences; 3101 Biochemistry and Cell Biology
10.1371/journal.pone.0225596	32 Biomedical and Clinical Sciences; 3207 Medical Microbiology
10.1371/journal.pone.0225223	42 Health Sciences; 4206 Public Health
10.1371/journal.pone.0225036	32 Biomedical and Clinical Sciences; 3203 Dentistry; 3215 Reproductive Medicine
10.1371/journal.pone.0224625	41 Environmental Sciences; 4101 Climate Change Impacts and Adaptation
10.1371/journal.pone.0225263	40 Engineering; 42 Health Sciences; 4207 Sports Science and Exercise
10.1371/journal.pone.0225592	32 Biomedical and Clinical Sciences; 46 Information and Computing Sciences; 4608 Human-Centred Computing
10.1371/journal.pone.0225650	32 Biomedical and Clinical Sciences; 3202 Clinical Sciences
10.1371/journal.pone.0225642	32 Biomedical and Clinical Sciences; 42 Health Sciences; 4204 Midwifery
10.1371/journal.pone.0225211	30 Agricultural, Veterinary and Food Sciences; 3009 Veterinary Sciences
10.1371/journal.pone.0225341	32 Biomedical and Clinical Sciences; 41 Environmental Sciences; 4105 Pollution and Contamination
10.1371/journal.pone.0225723	32 Biomedical and Clinical Sciences; 3202 Clinical Sciences
10.1371/journal.pone.0225714	31 Biological Sciences; 3103 Ecology; 41 Environmental Sciences
10.1371/journal.pcbi.1006863	31 Biological Sciences; 3102 Bioinformatics and Computational Biology; 3107 Microbiology; 32 Biomedical and Clinical Sciences; 3202 Clinical Sciences
10.1371/journal.pone.0225302	31 Biological Sciences; 3105 Genetics
10.1371/journal.pone.0225405	38 Economics; 3801 Applied Economics; 44 Human Society; 4403 Demography; 4406 Human Geography; 4408 Political Science
10.1371/journal.pone.0225438	31 Biological Sciences; 3103 Ecology; 41 Environmental Sciences; 4102 Ecological Applications
10.1371/journal.pone.0225581	52 Psychology; 5201 Applied and Developmental Psychology
10.1371/journal.pone.0225339	31 Biological Sciences; 3101 Biochemistry and Cell Biology
10.1371/journal.pone.0225166	31 Biological Sciences; 3101 Biochemistry and Cell Biology
10.1371/journal.pone.0225513	31 Biological Sciences; 3103 Ecology; 41 Environmental Sciences
10.1371/journal.pntd.0007814	32 Biomedical and Clinical Sciences; 3207 Medical Microbiology
10.1371/journal.pone.0225434	32 Biomedical and Clinical Sciences; 3202 Clinical Sciences; 3207 Medical Microbiology
10.1371/journal.pone.0225040	52 Psychology; 5203 Clinical and Health Psychology
10.1371/journal.pone.0219807	31 Biological Sciences; 3107 Microbiology; 32 Biomedical and Clinical Sciences; 3207 Medical Microbiology; 41 Environmental Sciences
10.1371/journal.pone.0225453	32 Biomedical and Clinical Sciences; 3203 Dentistry
10.1371/journal.pone.0225461	31 Biological Sciences; 32 Biomedical and Clinical Sciences; 3207 Medical Microbiology
10.1371/journal.pone.0225631	32 Biomedical and Clinical Sciences; 3207 Medical Microbiology
10.1371/journal.pntd.0007904	31 Biological Sciences; 32 Biomedical and Clinical Sciences; 3207 Medical Microbiology
10.1371/journal.pone.0225274	52 Psychology; 5205 Social and Personality Psychology
10.1371/journal.pone.0225463	32 Biomedical and Clinical Sciences; 3205 Medical Biochemistry and Metabolomics; 3215 Reproductive Medicine; 34 Chemical Sciences; 3401 Analytical Chemistry
10.1371/journal.pone.0225454	42 Health Sciences; 4203 Health Services and Systems
10.1371/journal.pone.0225248	31 Biological Sciences; 3103 Ecology
10.1371/journal.pone.0225306	36 Creative Arts and Writing; 3605 Screen and Digital Media; 47 Language, Communication and Culture
10.1371/journal.pone.0225276	46 Information and Computing Sciences; 4610 Library and Information Studies
10.1371/journal.pone.0225050	52 Psychology; 5202 Biological Psychology
10.1371/journal.pone.0223993	31 Biological Sciences; 3101 Biochemistry and Cell Biology
10.1371/journal.pone.0224743	31 Biological Sciences; 32 Biomedical and Clinical Sciences; 3202 Clinical Sciences; 3207 Medical Microbiology
10.1371/journal.pone.0225595	42 Health Sciences; 4203 Health Services and Systems
10.1371/journal.pone.0225498	44 Human Society; 4404 Development Studies
10.1371/journal.pone.0225127	32 Biomedical and Clinical Sciences; 3202 Clinical Sciences
10.1371/journal.pntd.0007890	32 Biomedical and Clinical Sciences; 3202 Clinical Sciences; 3207 Medical Microbiology
10.1371/journal.pone.0225324	43 History, Heritage and Archaeology; 4303 Historical Studies; 50 Philosophy and Religious Studies
10.1371/journal.pone.0225148	32 Biomedical and Clinical Sciences; 3215 Reproductive Medicine; 42 Health Sciences; 4204 Midwifery; 4206 Public Health
10.1371/journal.pone.0225048	31 Biological Sciences; 3103 Ecology
10.1371/journal.pntd.0007832	31 Biological Sciences; 32 Biomedical and Clinical Sciences; 42 Health Sciences
10.1371/journal.pone.0225594	32 Biomedical and Clinical Sciences; 3207 Medical Microbiology
10.1371/journal.pone.0225039	32 Biomedical and Clinical Sciences; 3211 Oncology and Carcinogenesis; 42 Health Sciences; 4203 Health Services and Systems
10.1371/journal.pcbi.1007518	32 Biomedical and Clinical Sciences; 3207 Medical Microbiology; 46 Information and Computing Sciences
10.1371/journal.pone.0224564	32 Biomedical and Clinical Sciences; 3211 Oncology and Carcinogenesis
10.1371/journal.pone.0223809	32 Biomedical and Clinical Sciences; 3202 Clinical Sciences; 42 Health Sciences
10.1371/journal.pone.0225347	31 Biological Sciences; 3103 Ecology; 3109 Zoology
10.1371/journal.pone.0215718	32 Biomedical and Clinical Sciences; 3215 Reproductive Medicine
10.1371/journal.pone.0224893	46 Information and Computing Sciences; 4607 Graphics, Augmented Reality and Games
10.1371/journal.pntd.0007853	31 Biological Sciences; 32 Biomedical and Clinical Sciences; 3207 Medical Microbiology
10.1371/journal.pntd.0007859	31 Biological Sciences; 3105 Genetics; 32 Biomedical and Clinical Sciences
10.1371/journal.pone.0225520	39 Education; 3901 Curriculum and Pedagogy
10.1371/journal.pone.0225381	32 Biomedical and Clinical Sciences; 3207 Medical Microbiology
10.1371/journal.pmed.1002966	32 Biomedical and Clinical Sciences; 3202 Clinical Sciences
10.1371/journal.pone.0225480	32 Biomedical and Clinical Sciences; 3212 Ophthalmology and Optometry; 40 Engineering; 4003 Biomedical Engineering
10.1371/journal.pone.0225283	32 Biomedical and Clinical Sciences; 52 Psychology; 5202 Biological Psychology
10.1371/journal.pone.0225575	32 Biomedical and Clinical Sciences; 3202 Clinical Sciences; 3207 Medical Microbiology
10.1371/journal.pbio.3000495	31 Biological Sciences; 3101 Biochemistry and Cell Biology
10.1371/journal.pone.0225430	30 Agricultural, Veterinary and Food Sciences; 3004 Crop and Pasture Production; 31 Biological Sciences; 3103 Ecology; 41 Environmental Sciences
10.1371/journal.pone.0225266	31 Biological Sciences; 3103 Ecology; 3109 Zoology; 41 Environmental Sciences
10.1371/journal.pntd.0007844	32 Biomedical and Clinical Sciences; 3202 Clinical Sciences
10.1371/journal.pone.0224961	32 Biomedical and Clinical Sciences; 3202 Clinical Sciences
10.1371/journal.pone.0222399	32 Biomedical and Clinical Sciences; 3215 Reproductive Medicine; 42 Health Sciences; 4204 Midwifery; 4206 Public Health
10.1371/journal.pone.0225379	31 Biological Sciences; 3107 Microbiology; 32 Biomedical and Clinical Sciences; 3202 Clinical Sciences; 3207 Medical Microbiology
10.1371/journal.pone.0225075	32 Biomedical and Clinical Sciences; 3202 Clinical Sciences; 42 Health Sciences
10.1371/journal.pone.0224695	31 Biological Sciences; 3105 Genetics
10.1371/journal.pone.0225110	31 Biological Sciences; 3107 Microbiology; 32 Biomedical and Clinical Sciences; 3202 Clinical Sciences
10.1371/journal.pone.0225286	52 Psychology; 5202 Biological Psychology
10.1371/journal.pone.0224318	32 Biomedical and Clinical Sciences; 3204 Immunology
10.1371/journal.pone.0225527	31 Biological Sciences; 3101 Biochemistry and Cell Biology; 32 Biomedical and Clinical Sciences
10.1371/journal.pone.0225549	44 Human Society; 52 Psychology; 5202 Biological Psychology; 5205 Social and Personality Psychology
10.1371/journal.pone.0223767	39 Education; 3901 Curriculum and Pedagogy; 3903 Education Systems
10.1371/journal.pone.0224583	32 Biomedical and Clinical Sciences; 51 Physical Sciences; 5105 Medical and Biological Physics
10.1371/journal.pone.0225252	30 Agricultural, Veterinary and Food Sciences; 3004 Crop and Pasture Production; 31 Biological Sciences; 3103 Ecology; 3108 Plant Biology
10.1371/journal.pone.0225183	31 Biological Sciences; 3103 Ecology; 41 Environmental Sciences
10.1371/journal.pone.0225361	32 Biomedical and Clinical Sciences; 3202 Clinical Sciences; 3207 Medical Microbiology
10.1371/journal.pone.0224946	38 Economics; 3801 Applied Economics; 3803 Economic Theory
10.1371/journal.pone.0225319	39 Education; 52 Psychology; 5201 Applied and Developmental Psychology
10.1371/journal.pone.0225366	32 Biomedical and Clinical Sciences; 3202 Clinical Sciences; 42 Health Sciences
10.1371/journal.pone.0224773	32 Biomedical and Clinical Sciences; 3202 Clinical Sciences
10.1371/journal.pone.0219332	31 Biological Sciences; 3101 Biochemistry and Cell Biology
10.1371/journal.pone.0225472	32 Biomedical and Clinical Sciences; 3206 Medical Biotechnology; 40 Engineering; 4003 Biomedical Engineering
10.1371/journal.pcbi.1007444	42 Health Sciences; 4207 Sports Science and Exercise; 44 Human Society
10.1371/journal.pone.0224292	32 Biomedical and Clinical Sciences; 3207 Medical Microbiology
10.1371/journal.pone.0225376	44 Human Society; 4402 Criminology; 48 Law and Legal Studies; 4805 Legal Systems
10.1371/journal.pone.0224420	31 Biological Sciences; 32 Biomedical and Clinical Sciences; 3211 Oncology and Carcinogenesis
10.1371/journal.pone.0225269	42 Health Sciences; 4203 Health Services and Systems; 4205 Nursing
10.1371/journal.pone.0225424	31 Biological Sciences; 3103 Ecology; 3109 Zoology; 41 Environmental Sciences; 4104 Environmental Management
10.1371/journal.ppat.1008160	31 Biological Sciences; 3101 Biochemistry and Cell Biology
10.1371/journal.pone.0224197	31 Biological Sciences; 3104 Evolutionary Biology
10.1371/journal.pone.0224793	32 Biomedical and Clinical Sciences; 3203 Dentistry
10.1371/journal.pone.0224762	34 Chemical Sciences; 3406 Physical Chemistry; 3407 Theoretical and Computational Chemistry
10.1371/journal.pone.0225515	32 Biomedical and Clinical Sciences; 3202 Clinical Sciences; 42 Health Sciences; 4201 Allied Health and Rehabilitation Science; 4207 Sports Science and Exercise
10.1371/journal.pone.0225457	31 Biological Sciences; 3105 Genetics; 32 Biomedical and Clinical Sciences; 3215 Reproductive Medicine
10.1371/journal.pone.0225510	31 Biological Sciences; 3101 Biochemistry and Cell Biology
10.1371/journal.pcbi.1007423	32 Biomedical and Clinical Sciences; 3211 Oncology and Carcinogenesis
10.1371/journal.pone.0225637	31 Biological Sciences; 3103 Ecology; 32 Biomedical and Clinical Sciences
10.1371/journal.pone.0225323	32 Biomedical and Clinical Sciences; 3202 Clinical Sciences
10.1371/journal.pone.0225261	31 Biological Sciences; 3101 Biochemistry and Cell Biology; 3102 Bioinformatics and Computational Biology
10.1371/journal.pone.0225238	42 Health Sciences; 4201 Allied Health and Rehabilitation Science; 4203 Health Services and Systems
10.1371/journal.pone.0225287	42 Health Sciences; 4207 Sports Science and Exercise
10.1371/journal.pntd.0007847	42 Health Sciences; 4203 Health Services and Systems; 4206 Public Health
10.1371/journal.pone.0225583	30 Agricultural, Veterinary and Food Sciences; 3009 Veterinary Sciences
10.1371/journal.pone.0224749	32 Biomedical and Clinical Sciences; 3202 Clinical Sciences; 42 Health Sciences; 4203 Health Services and Systems; 4206 Public Health
10.1371/journal.pone.0223987	31 Biological Sciences; 3101 Biochemistry and Cell Biology; 32 Biomedical and Clinical Sciences
10.1371/journal.pone.0224922	31 Biological Sciences; 3102 Bioinformatics and Computational Biology; 32 Biomedical and Clinical Sciences
10.1371/journal.pone.0225505	31 Biological Sciences; 3102 Bioinformatics and Computational Biology
10.1371/journal.pone.0225400	32 Biomedical and Clinical Sciences; 3215 Reproductive Medicine; 42 Health Sciences; 4204 Midwifery
10.1371/journal.pone.0225119	42 Health Sciences; 4203 Health Services and Systems; 4206 Public Health; 44 Human Society
10.1371/journal.pone.0225532	32 Biomedical and Clinical Sciences; 3204 Immunology; 3211 Oncology and Carcinogenesis
10.1371/journal.pone.0225524	30 Agricultural, Veterinary and Food Sciences; 3009 Veterinary Sciences; 31 Biological Sciences
10.1371/journal.pone.0225516	32 Biomedical and Clinical Sciences; 3202 Clinical Sciences
10.1371/journal.pone.0225497	31 Biological Sciences; 3107 Microbiology; 32 Biomedical and Clinical Sciences; 3202 Clinical Sciences; 3211 Oncology and Carcinogenesis
10.1371/journal.pone.0225459	40 Engineering; 4003 Biomedical Engineering; 4007 Control Engineering, Mechatronics and Robotics
10.1371/journal.pone.0225455	32 Biomedical and Clinical Sciences; 3202 Clinical Sciences
10.1371/journal.pone.0225451	31 Biological Sciences; 3105 Genetics; 3108 Plant Biology
10.1371/journal.pone.0225449	32 Biomedical and Clinical Sciences; 41 Environmental Sciences; 4105 Pollution and Contamination
10.1371/journal.pone.0225374	42 Health Sciences; 4206 Public Health; 44 Human Society
10.1371/journal.pone.0225370	32 Biomedical and Clinical Sciences; 47 Language, Communication and Culture; 4701 Communication and Media Studies
10.1371/journal.pone.0225367	38 Economics; 44 Human Society; 4404 Development Studies
10.1371/journal.pone.0225346	35 Commerce, Management, Tourism and Services; 3509 Transportation, Logistics and Supply Chains; 46 Information and Computing Sciences; 4605 Data Management and Data Science
10.1371/journal.pone.0225344	32 Biomedical and Clinical Sciences; 3202 Clinical Sciences; 42 Health Sciences; 4203 Health Services and Systems
10.1371/journal.pone.0225329	32 Biomedical and Clinical Sciences; 3202 Clinical Sciences; 42 Health Sciences; 4203 Health Services and Systems; 4205 Nursing
10.1371/journal.pone.0225325	37 Earth Sciences; 3708 Oceanography
10.1371/journal.pone.0225321	32 Biomedical and Clinical Sciences; 3202 Clinical Sciences
10.1371/journal.pone.0225311	46 Information and Computing Sciences; 52 Psychology; 5204 Cognitive and Computational Psychology
10.1371/journal.pone.0225271	37 Earth Sciences; 3701 Atmospheric Sciences; 3703 Geochemistry
10.1371/journal.pone.0225262	31 Biological Sciences; 3103 Ecology; 41 Environmental Sciences; 4101 Climate Change Impacts and Adaptation
10.1371/journal.pone.0225254	32 Biomedical and Clinical Sciences; 3202 Clinical Sciences; 42 Health Sciences
10.1371/journal.pone.0225243	42 Health Sciences; 4203 Health Services and Systems
10.1371/journal.pone.0225203	35 Commerce, Management, Tourism and Services; 3509 Transportation, Logistics and Supply Chains; 40 Engineering; 4005 Civil Engineering
10.1371/journal.pone.0225180	31 Biological Sciences; 3101 Biochemistry and Cell Biology; 32 Biomedical and Clinical Sciences; 3211 Oncology and Carcinogenesis
10.1371/journal.pone.0225161	30 Agricultural, Veterinary and Food Sciences; 3009 Veterinary Sciences
10.1371/journal.pone.0225140	32 Biomedical and Clinical Sciences; 3213 Paediatrics
10.1371/journal.pone.0225134	32 Biomedical and Clinical Sciences; 3202 Clinical Sciences; 3211 Oncology and Carcinogenesis
10.1371/journal.pone.0225118	32 Biomedical and Clinical Sciences; 3202 Clinical Sciences; 42 Health Sciences
10.1371/journal.pone.0225028	38 Economics; 3801 Applied Economics; 3803 Economic Theory; 46 Information and Computing Sciences; 4608 Human-Centred Computing
10.1371/journal.pone.0224970	42 Health Sciences; 4203 Health Services and Systems; 4206 Public Health
10.1371/journal.pone.0224936	34 Chemical Sciences; 3406 Physical Chemistry; 51 Physical Sciences
10.1371/journal.pone.0224897	30 Agricultural, Veterinary and Food Sciences; 3004 Crop and Pasture Production; 31 Biological Sciences; 3105 Genetics
10.1371/journal.pone.0224741	37 Earth Sciences; 3709 Physical Geography and Environmental Geoscience; 43 History, Heritage and Archaeology; 4301 Archaeology
10.1371/journal.pone.0224722	32 Biomedical and Clinical Sciences; 3202 Clinical Sciences; 42 Health Sciences
10.1371/journal.pone.0224666	43 History, Heritage and Archaeology; 4301 Archaeology; 4303 Historical Studies
10.1371/journal.pone.0224665	32 Biomedical and Clinical Sciences; 3202 Clinical Sciences; 3211 Oncology and Carcinogenesis
10.1371/journal.pone.0224617	30 Agricultural, Veterinary and Food Sciences; 3009 Veterinary Sciences; 31 Biological Sciences
10.1371/journal.pone.0224571	38 Economics; 52 Psychology; 5204 Cognitive and Computational Psychology
10.1371/journal.pone.0224496	32 Biomedical and Clinical Sciences; 3204 Immunology
10.1371/journal.pone.0224425	46 Information and Computing Sciences; 4605 Data Management and Data Science; 47 Language, Communication and Culture; 4704 Linguistics
10.1371/journal.pone.0224314	31 Biological Sciences; 3101 Biochemistry and Cell Biology; 34 Chemical Sciences; 3404 Medicinal and Biomolecular Chemistry
10.1371/journal.pone.0224240	46 Information and Computing Sciences; 4604 Cybersecurity and Privacy
10.1371/journal.pone.0224227	31 Biological Sciences; 3105 Genetics; 32 Biomedical and Clinical Sciences; 3211 Oncology and Carcinogenesis
10.1371/journal.pone.0223597	32 Biomedical and Clinical Sciences; 3202 Clinical Sciences
10.1371/journal.pone.0223405	35 Commerce, Management, Tourism and Services; 3503 Business Systems In Context; 3507 Strategy, Management and Organisational Behaviour; 46 Information and Computing Sciences; 4609 Information Systems
10.1371/journal.pone.0218299	32 Biomedical and Clinical Sciences; 3202 Clinical Sciences
10.1371/journal.pone.0215192	32 Biomedical and Clinical Sciences; 3202 Clinical Sciences
10.1371/journal.pntd.0007886	32 Biomedical and Clinical Sciences; 3204 Immunology; 3207 Medical Microbiology
10.1371/journal.pntd.0007828	31 Biological Sciences; 3107 Microbiology; 32 Biomedical and Clinical Sciences; 3202 Clinical Sciences; 3207 Medical Microbiology
10.1371/journal.pmed.1002985	32 Biomedical and Clinical Sciences; 3202 Clinical Sciences; 42 Health Sciences
10.1371/journal.pgen.1008497	31 Biological Sciences; 3105 Genetics
10.1371/journal.pgen.1008477	31 Biological Sciences; 3101 Biochemistry and Cell Biology
10.1371/journal.pcbi.1007484	32 Biomedical and Clinical Sciences; 3209 Neurosciences; 46 Information and Computing Sciences; 4611 Machine Learning; 51 Physical Sciences
10.1371/journal.pone.0225521	42 Health Sciences; 4202 Epidemiology; 4206 Public Health
10.1371/journal.pone.0225496	31 Biological Sciences; 3101 Biochemistry and Cell Biology
10.1371/journal.pone.0225478	32 Biomedical and Clinical Sciences; 3202 Clinical Sciences
10.1371/journal.pone.0225416	42 Health Sciences; 4203 Health Services and Systems
10.1371/journal.pone.0225413	42 Health Sciences; 4201 Allied Health and Rehabilitation Science
10.1371/journal.pone.0225403	32 Biomedical and Clinical Sciences; 3201 Cardiovascular Medicine and Haematology; 3202 Clinical Sciences
10.1371/journal.pone.0225340	31 Biological Sciences; 3107 Microbiology; 32 Biomedical and Clinical Sciences; 3202 Clinical Sciences
10.1371/journal.pone.0225328	32 Biomedical and Clinical Sciences; 3213 Paediatrics; 3215 Reproductive Medicine
10.1371/journal.pone.0225310	32 Biomedical and Clinical Sciences; 3202 Clinical Sciences
10.1371/journal.pone.0225298	32 Biomedical and Clinical Sciences; 3202 Clinical Sciences
10.1371/journal.pone.0225225	32 Biomedical and Clinical Sciences; 34 Chemical Sciences; 3401 Analytical Chemistry
10.1371/journal.pone.0225201	41 Environmental Sciences; 4104 Environmental Management
10.1371/journal.pone.0225194	42 Health Sciences; 4203 Health Services and Systems; 4206 Public Health
10.1371/journal.pone.0225165	32 Biomedical and Clinical Sciences; 3202 Clinical Sciences
10.1371/journal.pone.0225163	32 Biomedical and Clinical Sciences; 3215 Reproductive Medicine; 42 Health Sciences; 4204 Midwifery
10.1371/journal.pone.0225152	32 Biomedical and Clinical Sciences; 3202 Clinical Sciences
10.1371/journal.pone.0225095	32 Biomedical and Clinical Sciences; 3211 Oncology and Carcinogenesis
10.1371/journal.pone.0225056	34 Chemical Sciences; 3404 Medicinal and Biomolecular Chemistry
10.1371/journal.pone.0225032	40 Engineering; 4003 Biomedical Engineering; 42 Health Sciences; 4201 Allied Health and Rehabilitation Science
10.1371/journal.pone.0225007	40 Engineering; 4003 Biomedical Engineering; 4014 Manufacturing Engineering
10.1371/journal.pone.0225002	46 Information and Computing Sciences; 4611 Machine Learning
10.1371/journal.pone.0225000	42 Health Sciences; 4203 Health Services and Systems; 4206 Public Health
10.1371/journal.pone.0224972	30 Agricultural, Veterinary and Food Sciences; 3006 Food Sciences
10.1371/journal.pone.0224968	32 Biomedical and Clinical Sciences; 3210 Nutrition and Dietetics
10.1371/journal.pone.0224928	32 Biomedical and Clinical Sciences; 3202 Clinical Sciences
10.1371/journal.pone.0224865	52 Psychology; 5203 Clinical and Health Psychology; 5205 Social and Personality Psychology
10.1371/journal.pone.0224790	30 Agricultural, Veterinary and Food Sciences; 3004 Crop and Pasture Production; 37 Earth Sciences; 41 Environmental Sciences; 4106 Soil Sciences
10.1371/journal.pone.0224697	46 Information and Computing Sciences; 47 Language, Communication and Culture; 4704 Linguistics
10.1371/journal.pone.0224693	32 Biomedical and Clinical Sciences; 3211 Oncology and Carcinogenesis
10.1371/journal.pone.0224430	32 Biomedical and Clinical Sciences; 3204 Immunology; 3211 Oncology and Carcinogenesis
10.1371/journal.pone.0224021	41 Environmental Sciences; 4104 Environmental Management
10.1371/journal.pone.0222070	32 Biomedical and Clinical Sciences; 3203 Dentistry
10.1371/journal.pone.0221646	41 Environmental Sciences; 4103 Environmental Biotechnology
10.1371/journal.pone.0220757	32 Biomedical and Clinical Sciences; 3208 Medical Physiology
10.1371/journal.pone.0220584	31 Biological Sciences; 3107 Microbiology; 32 Biomedical and Clinical Sciences; 3207 Medical Microbiology
10.1371/journal.pone.0219032	32 Biomedical and Clinical Sciences; 3202 Clinical Sciences; 42 Health Sciences; 4203 Health Services and Systems; 4206 Public Health
10.1371/journal.pone.0218645	32 Biomedical and Clinical Sciences; 3202 Clinical Sciences; 3211 Oncology and Carcinogenesis
10.1371/journal.pntd.0007874	32 Biomedical and Clinical Sciences; 3204 Immunology; 3207 Medical Microbiology
10.1371/journal.pmed.1002967	32 Biomedical and Clinical Sciences; 3202 Clinical Sciences; 3214 Pharmacology and Pharmaceutical Sciences
10.1371/journal.pmed.1002963	42 Health Sciences; 4203 Health Services and Systems
10.1371/journal.ppat.1008169	31 Biological Sciences; 3107 Microbiology; 32 Biomedical and Clinical Sciences; 3204 Immunology; 3207 Medical Microbiology
10.1371/journal.ppat.1008163	31 Biological Sciences; 3101 Biochemistry and Cell Biology
10.1371/journal.ppat.1007862	31 Biological Sciences; 3107 Microbiology; 32 Biomedical and Clinical Sciences; 3202 Clinical Sciences; 3207 Medical Microbiology
10.1371/journal.pone.0225343	30 Agricultural, Veterinary and Food Sciences; 31 Biological Sciences; 3107 Microbiology; 3109 Zoology
10.1371/journal.pone.0225337	30 Agricultural, Veterinary and Food Sciences; 3007 Forestry Sciences; 31 Biological Sciences; 3103 Ecology
10.1371/journal.pone.0225280	38 Economics; 3803 Economic Theory
10.1371/journal.pone.0225268	32 Biomedical and Clinical Sciences; 3210 Nutrition and Dietetics; 42 Health Sciences; 4206 Public Health
10.1371/journal.pone.0225265	40 Engineering; 4012 Fluid Mechanics and Thermal Engineering; 46 Information and Computing Sciences
10.1371/journal.pone.0225255	32 Biomedical and Clinical Sciences; 3202 Clinical Sciences
10.1371/journal.pone.0225249	32 Biomedical and Clinical Sciences; 34 Chemical Sciences; 3404 Medicinal and Biomolecular Chemistry
10.1371/journal.pone.0225198	32 Biomedical and Clinical Sciences; 3202 Clinical Sciences; 42 Health Sciences; 4203 Health Services and Systems; 4205 Nursing
10.1371/journal.pone.0225196	46 Information and Computing Sciences; 4604 Cybersecurity and Privacy
10.1371/journal.pone.0225133	32 Biomedical and Clinical Sciences; 3213 Paediatrics; 3215 Reproductive Medicine; 42 Health Sciences; 4204 Midwifery
10.1371/journal.pone.0225132	31 Biological Sciences; 3101 Biochemistry and Cell Biology; 34 Chemical Sciences; 3404 Medicinal and Biomolecular Chemistry; 46 Information and Computing Sciences; 4613 Theory Of Computation
10.1371/journal.pone.0225124	30 Agricultural, Veterinary and Food Sciences; 3009 Veterinary Sciences; 32 Biomedical and Clinical Sciences
10.1371/journal.pone.0225103	35 Commerce, Management, Tourism and Services; 3505 Human Resources and Industrial Relations; 52 Psychology
10.1371/journal.pone.0225098	46 Information and Computing Sciences; 4608 Human-Centred Computing
10.1371/journal.pone.0225092	40 Engineering; 46 Information and Computing Sciences; 4605 Data Management and Data Science
10.1371/journal.pone.0225090	30 Agricultural, Veterinary and Food Sciences; 3001 Agricultural Biotechnology; 3004 Crop and Pasture Production; 31 Biological Sciences; 3108 Plant Biology
10.1371/journal.pone.0225073	31 Biological Sciences; 3102 Bioinformatics and Computational Biology; 3105 Genetics
10.1371/journal.pone.0225054	31 Biological Sciences; 3106 Industrial Biotechnology
10.1371/journal.pone.0225041	40 Engineering; 46 Information and Computing Sciences; 4603 Computer Vision and Multimedia Computation
10.1371/journal.pone.0225003	31 Biological Sciences; 3103 Ecology
10.1371/journal.pone.0224919	31 Biological Sciences; 3101 Biochemistry and Cell Biology; 32 Biomedical and Clinical Sciences; 3215 Reproductive Medicine; 44 Human Society; 4403 Demography
10.1371/journal.pone.0224823	32 Biomedical and Clinical Sciences; 3212 Ophthalmology and Optometry
10.1371/journal.pone.0224805	32 Biomedical and Clinical Sciences; 3212 Ophthalmology and Optometry
10.1371/journal.pone.0224757	31 Biological Sciences; 3107 Microbiology
10.1371/journal.pone.0224751	32 Biomedical and Clinical Sciences; 3202 Clinical Sciences
10.1371/journal.pone.0224692	42 Health Sciences; 4203 Health Services and Systems
10.1371/journal.pone.0224689	31 Biological Sciences; 3101 Biochemistry and Cell Biology; 34 Chemical Sciences; 3402 Inorganic Chemistry
10.1371/journal.pone.0224658	32 Biomedical and Clinical Sciences; 3202 Clinical Sciences; 3207 Medical Microbiology; 3215 Reproductive Medicine
10.1371/journal.pone.0224557	42 Health Sciences; 4203 Health Services and Systems; 4206 Public Health
10.1371/journal.pone.0224432	30 Agricultural, Veterinary and Food Sciences; 41 Environmental Sciences; 4101 Climate Change Impacts and Adaptation
10.1371/journal.pone.0224410	32 Biomedical and Clinical Sciences; 3212 Ophthalmology and Optometry
10.1371/journal.pone.0224382	40 Engineering; 4006 Communications Engineering; 46 Information and Computing Sciences; 4603 Computer Vision and Multimedia Computation
10.1371/journal.pone.0224288	31 Biological Sciences; 3102 Bioinformatics and Computational Biology
10.1371/journal.pone.0223917	32 Biomedical and Clinical Sciences; 3202 Clinical Sciences; 3211 Oncology and Carcinogenesis; 42 Health Sciences
10.1371/journal.pone.0223710	32 Biomedical and Clinical Sciences; 3202 Clinical Sciences
10.1371/journal.pone.0223503	30 Agricultural, Veterinary and Food Sciences; 3009 Veterinary Sciences; 31 Biological Sciences; 3105 Genetics; 3107 Microbiology
10.1371/journal.pone.0223440	51 Physical Sciences; 5105 Medical and Biological Physics
10.1371/journal.pone.0223056	42 Health Sciences; 4206 Public Health; 52 Psychology
10.1371/journal.pone.0223043	32 Biomedical and Clinical Sciences; 42 Health Sciences; 4203 Health Services and Systems
10.1371/journal.pone.0222277	52 Psychology; 5201 Applied and Developmental Psychology
10.1371/journal.pone.0219230	32 Biomedical and Clinical Sciences; 3202 Clinical Sciences
10.1371/journal.pone.0218638	31 Biological Sciences; 3107 Microbiology; 32 Biomedical and Clinical Sciences; 3207 Medical Microbiology
10.1371/journal.pone.0215191	40 Engineering; 4003 Biomedical Engineering
10.1371/journal.pntd.0007894	31 Biological Sciences; 32 Biomedical and Clinical Sciences; 3207 Medical Microbiology
10.1371/journal.pntd.0007865	32 Biomedical and Clinical Sciences; 3204 Immunology; 3207 Medical Microbiology
10.1371/journal.pntd.0007842	31 Biological Sciences; 32 Biomedical and Clinical Sciences; 42 Health Sciences
10.1371/journal.pntd.0007820	32 Biomedical and Clinical Sciences; 3202 Clinical Sciences; 42 Health Sciences
10.1371/journal.pntd.0007818	31 Biological Sciences; 3102 Bioinformatics and Computational Biology; 3105 Genetics
10.1371/journal.pntd.0007816	32 Biomedical and Clinical Sciences; 3202 Clinical Sciences; 3207 Medical Microbiology
10.1371/journal.pgen.1008502	31 Biological Sciences; 3105 Genetics
10.1371/journal.pgen.1008486	31 Biological Sciences; 3101 Biochemistry and Cell Biology
10.1371/journal.pgen.1008476	31 Biological Sciences; 3105 Genetics
10.1371/journal.pgen.1008387	31 Biological Sciences; 3101 Biochemistry and Cell Biology
10.1371/journal.pgen.1008375	31 Biological Sciences; 3102 Bioinformatics and Computational Biology; 3105 Genetics
10.1371/journal.pgen.1008104	31 Biological Sciences; 3105 Genetics
10.1371/journal.pcbi.1007493	32 Biomedical and Clinical Sciences; 3211 Oncology and Carcinogenesis
10.1371/journal.pcbi.1007468	31 Biological Sciences; 3101 Biochemistry and Cell Biology
10.1371/journal.ppat.1008142	31 Biological Sciences; 32 Biomedical and Clinical Sciences; 3204 Immunology; 3207 Medical Microbiology
10.1371/journal.ppat.1008098	31 Biological Sciences; 3107 Microbiology; 32 Biomedical and Clinical Sciences; 3207 Medical Microbiology
10.1371/journal.ppat.1007926	32 Biomedical and Clinical Sciences; 3204 Immunology; 3207 Medical Microbiology
10.1371/journal.ppat.1007863	31 Biological Sciences; 3107 Microbiology; 32 Biomedical and Clinical Sciences; 3207 Medical Microbiology
10.1371/journal.ppat.1007687	31 Biological Sciences; 3101 Biochemistry and Cell Biology; 3107 Microbiology
10.1371/journal.pone.0225394	31 Biological Sciences; 3101 Biochemistry and Cell Biology
10.1371/journal.pone.0225390	32 Biomedical and Clinical Sciences; 3214 Pharmacology and Pharmaceutical Sciences
10.1371/journal.pone.0225380	31 Biological Sciences; 3102 Bioinformatics and Computational Biology; 32 Biomedical and Clinical Sciences; 3205 Medical Biochemistry and Metabolomics
10.1371/journal.pone.0225336	32 Biomedical and Clinical Sciences; 3202 Clinical Sciences; 42 Health Sciences; 4201 Allied Health and Rehabilitation Science; 4203 Health Services and Systems
10.1371/journal.pone.0225335	40 Engineering; 4004 Chemical Engineering; 4011 Environmental Engineering; 41 Environmental Sciences; 4105 Pollution and Contamination
10.1371/journal.pone.0225308	46 Information and Computing Sciences; 4610 Library and Information Studies
10.1371/journal.pone.0225285	52 Psychology; 5202 Biological Psychology; 5203 Clinical and Health Psychology
10.1371/journal.pone.0225245	40 Engineering; 4003 Biomedical Engineering
10.1371/journal.pone.0225244	31 Biological Sciences; 3101 Biochemistry and Cell Biology
10.1371/journal.pone.0225213	31 Biological Sciences; 3101 Biochemistry and Cell Biology
10.1371/journal.pone.0225178	32 Biomedical and Clinical Sciences; 3202 Clinical Sciences
10.1371/journal.pone.0225170	32 Biomedical and Clinical Sciences; 3202 Clinical Sciences; 3211 Oncology and Carcinogenesis
10.1371/journal.pone.0225146	32 Biomedical and Clinical Sciences; 3204 Immunology; 3207 Medical Microbiology
10.1371/journal.pone.0225136	32 Biomedical and Clinical Sciences; 3202 Clinical Sciences
10.1371/journal.pone.0225130	30 Agricultural, Veterinary and Food Sciences; 3009 Veterinary Sciences
10.1371/journal.pone.0225111	37 Earth Sciences; 40 Engineering; 4004 Chemical Engineering
10.1371/journal.pone.0225104	32 Biomedical and Clinical Sciences; 3215 Reproductive Medicine; 42 Health Sciences; 4204 Midwifery; 4206 Public Health
10.1371/journal.pone.0225058	42 Health Sciences; 4203 Health Services and Systems
10.1371/journal.pone.0225042	32 Biomedical and Clinical Sciences; 3202 Clinical Sciences
10.1371/journal.pone.0224988	32 Biomedical and Clinical Sciences; 46 Information and Computing Sciences; 4603 Computer Vision and Multimedia Computation
10.1371/journal.pone.0224979	52 Psychology; 5204 Cognitive and Computational Psychology
10.1371/journal.pone.0224964	32 Biomedical and Clinical Sciences; 3215 Reproductive Medicine
10.1371/journal.pone.0224951	42 Health Sciences; 4203 Health Services and Systems; 4206 Public Health; 44 Human Society
10.1371/journal.pone.0224887	31 Biological Sciences; 3103 Ecology; 41 Environmental Sciences; 4104 Environmental Management
10.1371/journal.pone.0224885	32 Biomedical and Clinical Sciences; 3211 Oncology and Carcinogenesis
10.1371/journal.pone.0224872	40 Engineering; 4003 Biomedical Engineering
10.1371/journal.pone.0224847	31 Biological Sciences; 3102 Bioinformatics and Computational Biology; 3105 Genetics
10.1371/journal.pone.0224816	31 Biological Sciences; 3107 Microbiology; 32 Biomedical and Clinical Sciences
10.1371/journal.pone.0224803	31 Biological Sciences; 3106 Industrial Biotechnology
10.1371/journal.pone.0224795	31 Biological Sciences; 3101 Biochemistry and Cell Biology; 3102 Bioinformatics and Computational Biology; 3108 Plant Biology
10.1371/journal.pone.0224750	31 Biological Sciences; 3102 Bioinformatics and Computational Biology; 42 Health Sciences
10.1371/journal.pone.0224680	32 Biomedical and Clinical Sciences; 3202 Clinical Sciences
10.1371/journal.pone.0224664	31 Biological Sciences; 41 Environmental Sciences; 4101 Climate Change Impacts and Adaptation
10.1371/journal.pone.0224508	32 Biomedical and Clinical Sciences; 3202 Clinical Sciences; 3207 Medical Microbiology
10.1371/journal.pone.0224446	31 Biological Sciences; 3102 Bioinformatics and Computational Biology
10.1371/journal.pone.0224229	32 Biomedical and Clinical Sciences; 3210 Nutrition and Dietetics
10.1371/journal.pone.0221796	34 Chemical Sciences; 3404 Medicinal and Biomolecular Chemistry
10.1371/journal.pntd.0007889	32 Biomedical and Clinical Sciences; 3207 Medical Microbiology
10.1371/journal.pntd.0007868	31 Biological Sciences; 3107 Microbiology; 32 Biomedical and Clinical Sciences; 3202 Clinical Sciences; 3207 Medical Microbiology
10.1371/journal.pntd.0007851	32 Biomedical and Clinical Sciences; 42 Health Sciences; 4202 Epidemiology
10.1371/journal.pntd.0007850	31 Biological Sciences; 3102 Bioinformatics and Computational Biology; 3105 Genetics; 32 Biomedical and Clinical Sciences; 3202 Clinical Sciences; 3207 Medical Microbiology
10.1371/journal.pntd.0007826	32 Biomedical and Clinical Sciences
10.1371/journal.pntd.0007792	32 Biomedical and Clinical Sciences; 3202 Clinical Sciences
10.1371/journal.pntd.0007748	32 Biomedical and Clinical Sciences; 3202 Clinical Sciences
10.1371/journal.pntd.0007693	31 Biological Sciences; 3101 Biochemistry and Cell Biology
10.1371/journal.pmed.1002958	32 Biomedical and Clinical Sciences; 3214 Pharmacology and Pharmaceutical Sciences
10.1371/journal.pgen.1008498	31 Biological Sciences; 3102 Bioinformatics and Computational Biology; 3105 Genetics
10.1371/journal.pgen.1008490	31 Biological Sciences; 3105 Genetics
10.1371/journal.pcbi.1007497	31 Biological Sciences; 3101 Biochemistry and Cell Biology; 3102 Bioinformatics and Computational Biology; 3105 Genetics
10.1371/journal.pcbi.1007316	40 Engineering; 46 Information and Computing Sciences; 4611 Machine Learning
10.1371/journal.pbio.3000530	31 Biological Sciences; 3101 Biochemistry and Cell Biology
10.1371/journal.ppat.1008038	32 Biomedical and Clinical Sciences; 3215 Reproductive Medicine
10.1371/journal.pone.0224676	31 Biological Sciences; 3107 Microbiology; 32 Biomedical and Clinical Sciences; 3202 Clinical Sciences; 3207 Medical Microbiology
10.1371/journal.pone.0225102	52 Psychology; 5205 Social and Personality Psychology
10.1371/journal.pone.0225107	32 Biomedical and Clinical Sciences; 3211 Oncology and Carcinogenesis
10.1371/journal.pone.0223477	46 Information and Computing Sciences; 4602 Artificial Intelligence; 4605 Data Management and Data Science
10.1371/journal.pone.0223955	30 Agricultural, Veterinary and Food Sciences; 3009 Veterinary Sciences; 32 Biomedical and Clinical Sciences; 3204 Immunology; 3207 Medical Microbiology
10.1371/journal.pone.0224730	31 Biological Sciences; 3107 Microbiology; 32 Biomedical and Clinical Sciences
10.1371/journal.pone.0221135	31 Biological Sciences; 3103 Ecology; 41 Environmental Sciences; 4101 Climate Change Impacts and Adaptation
10.1371/journal.pone.0224497	31 Biological Sciences; 3102 Bioinformatics and Computational Biology; 32 Biomedical and Clinical Sciences; 3215 Reproductive Medicine
10.1371/journal.pone.0224837	32 Biomedical and Clinical Sciences; 42 Health Sciences; 4206 Public Health
10.1371/journal.pone.0224917	32 Biomedical and Clinical Sciences; 3206 Medical Biotechnology
10.1371/journal.pone.0224661	40 Engineering; 4003 Biomedical Engineering
10.1371/journal.pone.0224565	32 Biomedical and Clinical Sciences; 42 Health Sciences; 4201 Allied Health and Rehabilitation Science
10.1371/journal.pone.0214902	31 Biological Sciences; 3103 Ecology; 41 Environmental Sciences
10.1371/journal.pone.0225160	32 Biomedical and Clinical Sciences; 3202 Clinical Sciences
10.1371/journal.pone.0225162	32 Biomedical and Clinical Sciences; 3215 Reproductive Medicine
10.1371/journal.pone.0225105	31 Biological Sciences; 3101 Biochemistry and Cell Biology
10.1371/journal.pone.0225080	31 Biological Sciences; 3102 Bioinformatics and Computational Biology; 32 Biomedical and Clinical Sciences; 3211 Oncology and Carcinogenesis
10.1371/journal.ppat.1007928	31 Biological Sciences; 3101 Biochemistry and Cell Biology; 3107 Microbiology
10.1371/journal.pone.0223549	42 Health Sciences; 4207 Sports Science and Exercise; 46 Information and Computing Sciences
10.1371/journal.pcbi.1007476	32 Biomedical and Clinical Sciences; 3209 Neurosciences; 46 Information and Computing Sciences; 4611 Machine Learning
10.1371/journal.ppat.1008037	32 Biomedical and Clinical Sciences; 3202 Clinical Sciences
10.1371/journal.pone.0225322	32 Biomedical and Clinical Sciences; 3212 Ophthalmology and Optometry
10.1371/journal.pone.0225317	31 Biological Sciences; 3102 Bioinformatics and Computational Biology; 46 Information and Computing Sciences; 4611 Machine Learning
10.1371/journal.pone.0222883	31 Biological Sciences; 3105 Genetics; 41 Environmental Sciences
10.1371/journal.pone.0225257	31 Biological Sciences; 3105 Genetics
10.1371/journal.pone.0225206	32 Biomedical and Clinical Sciences; 3206 Medical Biotechnology
10.1371/journal.pone.0224920	30 Agricultural, Veterinary and Food Sciences; 31 Biological Sciences; 3105 Genetics
10.1371/journal.pone.0225239	32 Biomedical and Clinical Sciences; 42 Health Sciences; 4203 Health Services and Systems
10.1371/journal.pone.0209539	30 Agricultural, Veterinary and Food Sciences; 3009 Veterinary Sciences; 32 Biomedical and Clinical Sciences; 3207 Medical Microbiology
10.1371/journal.pone.0224690	32 Biomedical and Clinical Sciences; 3202 Clinical Sciences
10.1371/journal.pone.0224982	32 Biomedical and Clinical Sciences; 3212 Ophthalmology and Optometry
10.1371/journal.pone.0224969	31 Biological Sciences; 3103 Ecology; 3105 Genetics; 41 Environmental Sciences
10.1371/journal.pone.0224256	46 Information and Computing Sciences; 52 Psychology; 5204 Cognitive and Computational Psychology
10.1371/journal.pcbi.1007268	51 Physical Sciences; 5103 Classical Physics
10.1371/journal.pone.0225260	32 Biomedical and Clinical Sciences; 3202 Clinical Sciences; 3211 Oncology and Carcinogenesis
10.1371/journal.pone.0224821	42 Health Sciences; 4202 Epidemiology; 4206 Public Health
10.1371/journal.pone.0225326	32 Biomedical and Clinical Sciences; 3202 Clinical Sciences
10.1371/journal.ppat.1008123	31 Biological Sciences; 3107 Microbiology; 32 Biomedical and Clinical Sciences; 3207 Medical Microbiology
10.1371/journal.pcbi.1007397	46 Information and Computing Sciences; 4611 Machine Learning
10.1371/journal.pone.0225121	44 Human Society; 4402 Criminology; 48 Law and Legal Studies; 4805 Legal Systems
10.1371/journal.pone.0224991	34 Chemical Sciences; 3407 Theoretical and Computational Chemistry
10.1371/journal.pcbi.1007443	52 Psychology; 5202 Biological Psychology
10.1371/journal.pone.0225126	30 Agricultural, Veterinary and Food Sciences; 3002 Agriculture, Land and Farm Management; 3004 Crop and Pasture Production
10.1371/journal.pone.0225197	32 Biomedical and Clinical Sciences; 42 Health Sciences; 4203 Health Services and Systems
10.1371/journal.pone.0225106	42 Health Sciences; 4206 Public Health; 52 Psychology
10.1371/journal.pone.0224854	30 Agricultural, Veterinary and Food Sciences; 3009 Veterinary Sciences; 31 Biological Sciences; 32 Biomedical and Clinical Sciences; 3202 Clinical Sciences; 3207 Medical Microbiology
10.1371/journal.pone.0224993	44 Human Society; 4406 Human Geography
10.1371/journal.pone.0225135	32 Biomedical and Clinical Sciences; 3202 Clinical Sciences; 3207 Medical Microbiology
10.1371/journal.pone.0225094	32 Biomedical and Clinical Sciences; 3209 Neurosciences; 46 Information and Computing Sciences; 4611 Machine Learning; 51 Physical Sciences
10.1371/journal.pone.0224618	32 Biomedical and Clinical Sciences; 3202 Clinical Sciences
10.1371/journal.pone.0224806	31 Biological Sciences; 3102 Bioinformatics and Computational Biology
10.1371/journal.pone.0224725	52 Psychology; 5205 Social and Personality Psychology
10.1371/journal.pone.0225199	32 Biomedical and Clinical Sciences; 3202 Clinical Sciences
10.1371/journal.pone.0224581	32 Biomedical and Clinical Sciences; 3201 Cardiovascular Medicine and Haematology; 3202 Clinical Sciences
10.1371/journal.pone.0225063	32 Biomedical and Clinical Sciences; 3202 Clinical Sciences; 3204 Immunology; 3207 Medical Microbiology
10.1371/journal.pone.0221379	32 Biomedical and Clinical Sciences; 3215 Reproductive Medicine; 42 Health Sciences; 4204 Midwifery
10.1371/journal.pone.0225052	32 Biomedical and Clinical Sciences; 3202 Clinical Sciences
10.1371/journal.pone.0223044	42 Health Sciences; 44 Human Society; 4404 Development Studies
10.1371/journal.pone.0225005	31 Biological Sciences; 3105 Genetics
10.1371/journal.pone.0221115	37 Earth Sciences; 3704 Geoinformatics; 40 Engineering; 4013 Geomatic Engineering; 41 Environmental Sciences
10.1371/journal.pone.0224735	32 Biomedical and Clinical Sciences; 3202 Clinical Sciences
10.1371/journal.pone.0225089	30 Agricultural, Veterinary and Food Sciences; 3009 Veterinary Sciences
10.1371/journal.pone.0225001	30 Agricultural, Veterinary and Food Sciences; 3003 Animal Production; 31 Biological Sciences; 3107 Microbiology
10.1371/journal.pone.0225177	40 Engineering; 4004 Chemical Engineering
10.1371/journal.pone.0224974	36 Creative Arts and Writing; 3603 Music
10.1371/journal.pone.0225070	52 Psychology; 5205 Social and Personality Psychology
10.1371/journal.pntd.0007800	32 Biomedical and Clinical Sciences; 3204 Immunology
10.1371/journal.pgen.1008449	31 Biological Sciences; 3105 Genetics
10.1371/journal.pone.0225139	37 Earth Sciences; 3704 Geoinformatics
10.1371/journal.pone.0224807	34 Chemical Sciences; 3404 Medicinal and Biomolecular Chemistry; 40 Engineering
10.1371/journal.pone.0225078	31 Biological Sciences; 3103 Ecology; 3108 Plant Biology
10.1371/journal.ppat.1007854	32 Biomedical and Clinical Sciences; 3201 Cardiovascular Medicine and Haematology
10.1371/journal.pone.0225229	32 Biomedical and Clinical Sciences; 3202 Clinical Sciences; 42 Health Sciences; 4205 Nursing
10.1371/journal.pone.0224526	52 Psychology; 5205 Social and Personality Psychology
10.1371/journal.pone.0225264	32 Biomedical and Clinical Sciences; 3211 Oncology and Carcinogenesis; 3215 Reproductive Medicine
10.1371/journal.pone.0223745	49 Mathematical Sciences; 4901 Applied Mathematics; 4904 Pure Mathematics
10.1371/journal.pone.0225011	42 Health Sciences; 4203 Health Services and Systems
10.1371/journal.pone.0224204	32 Biomedical and Clinical Sciences; 42 Health Sciences; 4206 Public Health; 44 Human Society; 4402 Criminology
10.1371/journal.pone.0224226	32 Biomedical and Clinical Sciences; 3202 Clinical Sciences
10.1371/journal.pgen.1008487	31 Biological Sciences; 3101 Biochemistry and Cell Biology
10.1371/journal.pone.0225186	31 Biological Sciences; 3105 Genetics
10.1371/journal.pone.0225009	52 Psychology; 5204 Cognitive and Computational Psychology
10.1371/journal.pone.0225164	40 Engineering; 4009 Electronics, Sensors and Digital Hardware; 4016 Materials Engineering; 46 Information and Computing Sciences; 4605 Data Management and Data Science
10.1371/journal.pone.0225204	32 Biomedical and Clinical Sciences; 3202 Clinical Sciences; 42 Health Sciences
10.1371/journal.ppat.1008076	31 Biological Sciences; 3102 Bioinformatics and Computational Biology; 32 Biomedical and Clinical Sciences; 3207 Medical Microbiology
10.1371/journal.pone.0224655	32 Biomedical and Clinical Sciences; 3202 Clinical Sciences; 42 Health Sciences
10.1371/journal.pone.0220830	30 Agricultural, Veterinary and Food Sciences; 3001 Agricultural Biotechnology
10.1371/journal.pone.0225093	32 Biomedical and Clinical Sciences; 3202 Clinical Sciences; 3211 Oncology and Carcinogenesis
10.1371/journal.pone.0225100	46 Information and Computing Sciences; 4611 Machine Learning
10.1371/journal.pone.0225215	31 Biological Sciences; 3101 Biochemistry and Cell Biology; 40 Engineering; 4003 Biomedical Engineering
10.1371/journal.pone.0224434	32 Biomedical and Clinical Sciences; 3212 Ophthalmology and Optometry
10.1371/journal.pbio.3000534	30 Agricultural, Veterinary and Food Sciences; 3004 Crop and Pasture Production; 31 Biological Sciences; 3103 Ecology; 3107 Microbiology
10.1371/journal.pone.0216971	32 Biomedical and Clinical Sciences; 42 Health Sciences; 4203 Health Services and Systems
10.1371/journal.pone.0224881	42 Health Sciences; 4201 Allied Health and Rehabilitation Science
10.1371/journal.pbio.3000476	31 Biological Sciences; 3105 Genetics
10.1371/journal.pone.0224522	35 Commerce, Management, Tourism and Services; 3509 Transportation, Logistics and Supply Chains; 46 Information and Computing Sciences
10.1371/journal.pone.0224883	40 Engineering; 4006 Communications Engineering; 46 Information and Computing Sciences
10.1371/journal.pone.0224796	31 Biological Sciences; 3103 Ecology; 3107 Microbiology; 41 Environmental Sciences
10.1371/journal.pone.0224739	32 Biomedical and Clinical Sciences; 3215 Reproductive Medicine
10.1371/journal.pone.0224027	32 Biomedical and Clinical Sciences; 3202 Clinical Sciences; 3211 Oncology and Carcinogenesis
10.1371/journal.pone.0224765	31 Biological Sciences; 3108 Plant Biology
10.1371/journal.pone.0225037	31 Biological Sciences; 3103 Ecology; 3105 Genetics
10.1371/journal.pone.0224262	50 Philosophy and Religious Studies; 5002 History and Philosophy Of Specific Fields
10.1371/journal.pone.0225088	32 Biomedical and Clinical Sciences; 3213 Paediatrics
10.1371/journal.pgen.1008469	31 Biological Sciences; 3102 Bioinformatics and Computational Biology; 3105 Genetics
10.1371/journal.pone.0224277	32 Biomedical and Clinical Sciences; 42 Health Sciences; 4203 Health Services and Systems
10.1371/journal.pone.0223964	31 Biological Sciences; 3105 Genetics; 43 History, Heritage and Archaeology; 4303 Historical Studies
10.1371/journal.pmed.1002972	32 Biomedical and Clinical Sciences; 3215 Reproductive Medicine; 42 Health Sciences; 4202 Epidemiology
10.1371/journal.pone.0224184	32 Biomedical and Clinical Sciences; 3202 Clinical Sciences
10.1371/journal.pone.0225174	31 Biological Sciences; 3105 Genetics
10.1371/journal.pone.0225218	32 Biomedical and Clinical Sciences; 3213 Paediatrics; 40 Engineering
10.1371/journal.pone.0222630	33 Built Environment and Design; 3304 Urban and Regional Planning; 44 Human Society; 4406 Human Geography
10.1371/journal.pone.0225187	32 Biomedical and Clinical Sciences; 3210 Nutrition and Dietetics; 42 Health Sciences
10.1371/journal.pone.0225025	32 Biomedical and Clinical Sciences; 3208 Medical Physiology
[truncated: 80,307 more rows]
