# Supplementary material
Source: publisher figshare collection journal article supplement (https://plos.figshare.com/articles/dataset/_/21687686)
Supplement: Supplementary file 6 [file 2]

## Open Science Indicators Column Descriptions

This file was prepared on 27-3-2023 by Allegra Pearce and Lauren Cadwallader and is part of the dataset: Public Library of Science (2022) PLOS Open Science Indicators. Figshare. Dataset (version 2).  
<https://doi.org/10.6084/m9.figshare.21687686>.

### Named contact Information

Name: Iain Hrynaskiewicz

ORCID: 0000-0002-9673-5559

Institution: Public Library of Science

Email: [ihrynaskiewicz@plos.org](mailto:ihrynaskiewicz@plos.org) / plos@plos.org

### Alternate Contact Information

Name: Lauren Cadwallader

ORCID: 0000-0002-7571-3502

Institution: Public Library of Science

Email: [lcadwallader@plos.org](mailto:lcadwallader@plos.org) / plos@plos.org

Column descriptions for data provided in PLOS-Dataset\_v2\_Mar23.csv and Comparator-Dataset\_v2\_Mar23.csv. The Method column indicates how data is gathered, whether from XML file data or found by DataSeer's assessment.

| Column Name       | Column description                    | Method | Additional Notes    | Present in comparator set?<br>Additional notes. |
|-------------------|---------------------------------------|--------|---------------------|-------------------------------------------------|
| Publication_Day   | Day of publication for each article   | XML    | "epub" date is used | Yes                                             |
| Publication_Month | Month of publication for each article | XML    | "epub" date is used | Yes                                             |
| Publication_Year  | Year of publication for each article  | XML    | "epub" date is used | Yes                                             |

|                                |                                                                                                          |          |                                                                                                                                                                                                   |                                                                                                                                                                                                  |
|--------------------------------|----------------------------------------------------------------------------------------------------------|----------|---------------------------------------------------------------------------------------------------------------------------------------------------------------------------------------------------|--------------------------------------------------------------------------------------------------------------------------------------------------------------------------------------------------|
| DOI                            | Digital object identifier (DOI) for each article                                                         | XML      |                                                                                                                                                                                                   | Yes                                                                                                                                                                                              |
| Discipline                     | A list of all disciplines each article is identified as.                                                 | XML      |                                                                                                                                                                                                   | Yes. Labelled as 'Major Mesh Terms', list of identified Major MeSH terms for each article                                                                                                        |
| Country                        | Country of the listed affiliation of the first listed corresponding author                               | XML      | If multiple affiliations are listed the first one is used. If multiple corresponding authors are listed, the first listed corresponding author is used.                                           | Yes (only present for ~3% of sample)                                                                                                                                                             |
| DA                             | The article's data availability statement                                                                | XML      |                                                                                                                                                                                                   | Yes. It comprises any Availability type statements (e.g. Data Availability or Code Availability) found in the article. If multiple statements are found they are separated by the " " character. |
| Data_Section<br>Text:Generated | Which sections of the research article indicated data was generated when assessed by DataSeer algorithm. | DataSeer | Labeled N/A if no data/code generation detected.<br>Multiple sections are separated by " " (e.g. Methods Supplementary)<br>If XML section tags are not available this will be labeled "Full Text" | Yes                                                                                                                                                                                              |

|                |                                                                                                                                                                                                                                                                                                                                        |          |                                                                                                                        |     |
|----------------|----------------------------------------------------------------------------------------------------------------------------------------------------------------------------------------------------------------------------------------------------------------------------------------------------------------------------------------|----------|------------------------------------------------------------------------------------------------------------------------|-----|
| Data_Generated | Was data generated in this text as assessed by DataSeer algorithm.                                                                                                                                                                                                                                                                     | DataSeer | Labeled “Yes” or “No”                                                                                                  | Yes |
| Data_Shared    | Was data shared in this text as assessed by DataSeer algorithm.                                                                                                                                                                                                                                                                        | DataSeer | Labeled “Yes” or “No”                                                                                                  | Yes |
| Data_location  | Location of data that was indicated as shared.                                                                                                                                                                                                                                                                                         | DataSeer | Labeled “Online” when a repository was used.<br><br>Multiple sections are separated by “ ” (e.g. Online Supplementary) | Yes |
| Repositories   | A list of standard repositories that were identified by DataSeer as having been used in the sharing of data/code in each article. Repositories are identified from URL/DOI/Accession IDs where possible. Only repositories from a standardized list will be identified. Domains will be provided for unidentified URLs where possible. | DataSeer | Multiple repositories separated by “ ” (e.g. Github Dryad)                                                             | Yes |
| URL            | A list of any URL/DOIs provided that host data or code online that were detected by DataSeer algorithm.                                                                                                                                                                                                                                | DataSeer | Multiple URLs or DOIs separated by “,”                                                                                 | Yes |
| Accessions     | A list of Accession IDs from identified repositories that host data or code online that were detected by DataSeer algorithm.                                                                                                                                                                                                           | DataSeer | Multiple Accession IDs separated by “,”                                                                                | Yes |
| Preprint_Match | Whether a preprint was identified for this published article when searching common DOI registration agencies.                                                                                                                                                                                                                          | DataSeer | “TRUE” or “FALSE” indicating whether a match was found across DOI registration                                         | Yes |

|                                |                                                                                                          |                   |                                                                                                                    |     |
|--------------------------------|----------------------------------------------------------------------------------------------------------|-------------------|--------------------------------------------------------------------------------------------------------------------|-----|
|                                |                                                                                                          |                   | agencies. Match is completed using title and author information.<br>Queries Crossref and Datacite.                 |     |
| Preprint_DOI                   | DOI of identified preprint match.                                                                        | Preprint Metadata | Gathered from DOI agency metadata.                                                                                 | Yes |
| Preprint_Day                   | Day of preprint DOI registration, usually same date as publication.                                      | Preprint Metadata | Note: Datacite DOI metadata does not always include a detailed date (will sometimes only include year level).      | Yes |
| Preprint_Month                 | Month of preprint DOI registration, usually same date as publication.                                    | Preprint Metadata | Note: Datacite DOI metadata does not always include a detailed date (will sometimes only include year level).      | Yes |
| Preprint_Year                  | Year of preprint DOI registration, usually same date as publication.                                     | Preprint Metadata | Note: Datacite DOI metadata does not always include a detailed date (will sometimes only include year level).      | Yes |
| Preprint_URL                   | URL to access top preprint match.                                                                        | Preprint Metadata | Provided where available, dependent on metadata.                                                                   | Yes |
| Preprint_Server                | Server top preprint match is hosted on.                                                                  | Preprint Metadata | If server name is not provided in preprint metadata DOI prefix is used to identify server when possible.           | Yes |
| Code_Section<br>Text:Generated | Which sections of the research article indicated code was generated when assessed by DataSeer algorithm. | DataSeer          | Labeled N/A if no code generation detected.<br>Multiple sections are separated by “ ” (e.g. Methods Supplementary) | Yes |

|                |                                                                    |          |                                                                                                                                                                                                      |     |
|----------------|--------------------------------------------------------------------|----------|------------------------------------------------------------------------------------------------------------------------------------------------------------------------------------------------------|-----|
|                |                                                                    |          | If XML section tags are not available this will be labeled "Full Text"                                                                                                                               |     |
| Code_Generated | Was code generated in this text as assessed by DataSeer algorithm. | DataSeer | Labeled "Yes" or "No"                                                                                                                                                                                | Yes |
| Code_Shared    | Was code shared in this text as assessed by DataSeer algorithm.    | DataSeer | Labeled "Yes" or "No"<br>Note: Shared <i>code is only detected if it is executable</i> (e.g. shared as a .R or .py file format), code shared in pdf of other image formats is not labeled as shared. | Yes |
| Code_location  | Location of code that was indicated as shared.                     | DataSeer | Labeled "Online" when a repository was used.<br><br>Multiple sections are separated by " " (e.g. Online Supplementary)                                                                               | Yes |
