# Supplementary material
Source: publisher figshare collection journal article supplement (https://plos.figshare.com/articles/dataset/_/21687686)
Supplement: Supplementary file 11 [file 4]

## Protocols Column Descriptions

This file was prepared on 22-9-2023 by Lauren Cadwallader and Asura Enkhbayar and is part of the dataset: Public Library of Science (2022) PLOS Open Science Indicators. Figshare. Dataset (version 4).

<https://doi.org/10.6084/m9.figshare.21687686>.

### Named contact Information

Name: Iain Hrynaskiewicz

ORCID: 0000-0002-9673-5559

Institution: Public Library of Science

Email: [ihrynaskiewicz@plos.org](mailto:ihrynaskiewicz@plos.org) / [plos@plos.org](mailto:plos@plos.org)

### Alternate Contact Information

Name: Lauren Cadwallader

ORCID: 0000-0002-7571-3502

Institution: Public Library of Science

Email: [lcadwallader@plos.org](mailto:lcadwallader@plos.org) / [plos@plos.org](mailto:plos@plos.org)

Column descriptions for data provided in Protocols-Dataset\_Sep23.csv. The Method column indicates how data is gathered, whether from XML file data or found by DataSeer's assessment.

| Column Name       | Column description                                                                     | Method   | Additional Notes                                                                                                                           |
|-------------------|----------------------------------------------------------------------------------------|----------|--------------------------------------------------------------------------------------------------------------------------------------------|
| DOI               | Digital object identifier (DOI) for each article                                       | XML      |                                                                                                                                            |
| Protocol_Shared   | Was a protocol shared in this text as assessed by DataSeer algorithm                   | DataSeer | Labeled "Yes" or "No"                                                                                                                      |
| Protocol_Location | Location of protocol(s) detected.                                                      | DataSeer | Labeled "Publication", "Repository" or "Supplemental Information". Multiple locations are separated by " " (e.g. Publication   Repository) |
| Protocol_Source   | Name of protocol location if it falls into the "Publication" or "Repository" category. | DataSeer |                                                                                                                                            |
| Protocol_URL      | URL of identified protocols                                                            | DataSeer |                                                                                                                                            |
| Pub_Day           | Publication day of article                                                             | XML      | "epub" date is used                                                                                                                        |
| Pub_Month         | Publication month of article                                                           | XML      | "epub" date is used                                                                                                                        |
| Pub_Year          | Publication year of article                                                            | XML      | "epub" date is used                                                                                                                        |
| Pub_Quarter       | Publication quarter based on the publication date                                      | DataSeer | In format yearquarter, e.g. 2023Q2.                                                                                                        |
| Cohort            | Which publisher cohort the article belongs to                                          | XML      | Labeled "PLOS" or "Comparator"                                                                                                             |
