# Supplementary material
Source: publisher figshare collection journal article supplement (https://plos.figshare.com/articles/dataset/_/21687686)
Supplement: Supplementary file 15 [file 5]

## Open Science Indicators Column Descriptions

This file was originally prepared on 8-3-2022 by Allegra Pearce and Lauren Cadwallader and was updated on 12-12-2023 by Lauren Cadwallader. It is part of the dataset:

Public Library of Science (2022) PLOS Open Science Indicators. Figshare. Dataset (version 5).

<https://doi.org/10.6084/m9.figshare.21687686>.

### Named contact Information

Name: Iain Hrynaskiewicz

ORCID: 0000-0002-9673-5559

Institution: Public Library of Science

Email: [ihrynaskiewicz@plos.org](mailto:ihrynaskiewicz@plos.org) / plos@plos.org

### Alternate Contact Information

Name: Lauren Cadwallader

ORCID: 0000-0002-7571-3502

Institution: Public Library of Science

Email: [lcadwallader@plos.org](mailto:lcadwallader@plos.org) / plos@plos.org

Column descriptions for data provided in PLOS-Dataset\_v5\_Dec23.csv and Comparator-Dataset\_v5\_Dec23.csv. The Method column indicates how data is gathered, whether from XML file data or found by DataSeer's assessment.

| Column Name       | Column description                    | Method | Additional Notes    | Present in comparator set?<br>Additional notes. |
|-------------------|---------------------------------------|--------|---------------------|-------------------------------------------------|
| Publication_Day   | Day of publication for each article   | XML    | "epub" date is used |                                                 |
| Publication_Month | Month of publication for each article | XML    | "epub" date is used |                                                 |
| Publication_Year  | Year of publication for each article  | XML    | "epub" date is used |                                                 |

|                             |                                                                                                          |          |                                                                                                                                                                                       |                                                                                                                                                                                                  |
|-----------------------------|----------------------------------------------------------------------------------------------------------|----------|---------------------------------------------------------------------------------------------------------------------------------------------------------------------------------------|--------------------------------------------------------------------------------------------------------------------------------------------------------------------------------------------------|
| DOI                         | Digital object identifier (DOI) for each article                                                         | XML      |                                                                                                                                                                                       | Yes                                                                                                                                                                                              |
| Discipline                  | A list of all disciplines each article is identified as.                                                 | XML      |                                                                                                                                                                                       | Yes. Disciplinary information taken from the Major MeSH terms for each article                                                                                                                   |
| Country                     | Country of the listed affiliation of the first listed corresponding author                               | XML      | If multiple affiliations are listed the first one is used. If multiple corresponding authors are listed, the first listed corresponding author is used.                               | Yes (only present for ~3% of sample)                                                                                                                                                             |
| DA_data                     | The article's data availability statement                                                                | XML      |                                                                                                                                                                                       | Yes. It comprises any Availability type statements (e.g. Data Availability or Code Availability) found in the article. If multiple statements are found they are separated by the " " character. |
| Data_Section_Text_Generated | Which sections of the research article indicated data was generated when assessed by DataSeer algorithm. | DataSeer | Labeled N/A if no data/code generation detected.<br>Multiple sections are separated by " " (e.g. Methods Supplementary)<br>If XML section tags are not available this will be labeled | Yes                                                                                                                                                                                              |

|                   |                                                                                                                                                                                                                                                                                                                                        |          |                                                                                                                        |     |
|-------------------|----------------------------------------------------------------------------------------------------------------------------------------------------------------------------------------------------------------------------------------------------------------------------------------------------------------------------------------|----------|------------------------------------------------------------------------------------------------------------------------|-----|
|                   |                                                                                                                                                                                                                                                                                                                                        |          | “Full Text”                                                                                                            |     |
| Data_Generated    | Was data generated in this text as assessed by DataSeer algorithm.                                                                                                                                                                                                                                                                     | DataSeer | Labeled “Yes” or “No”                                                                                                  | Yes |
| Data_Shared       | Was data shared in this text as assessed by DataSeer algorithm.                                                                                                                                                                                                                                                                        | DataSeer | Labeled “Yes” or “No”                                                                                                  | Yes |
| Data_location     | Location of data that was indicated as shared.                                                                                                                                                                                                                                                                                         | DataSeer | Labeled “Online” when a repository was used.<br><br>Multiple sections are separated by “ ” (e.g. Online Supplementary) | Yes |
| Repositories_data | A list of standard repositories that were identified by DataSeer as having been used in the sharing of data/code in each article. Repositories are identified from URL/DOI/Accession IDs where possible. Only repositories from a standardized list will be identified. Domains will be provided for unidentified URLs where possible. | DataSeer | Multiple repositories separated by “ ” (e.g. Github Dryad)                                                             | Yes |
| URL_data          | A list of any URLs provided that host data or code online that were detected by DataSeer algorithm.                                                                                                                                                                                                                                    | DataSeer | Multiple URLs separated by “,”                                                                                         | Yes |
| Accessions        | A list of Accession IDs from identified repositories that host data or code online that were detected by DataSeer                                                                                                                                                                                                                      | DataSeer | Multiple Accession IDs separated by “,”                                                                                | Yes |

|                |                                                                                                               |                   |                                                                                                                                                                               |     |
|----------------|---------------------------------------------------------------------------------------------------------------|-------------------|-------------------------------------------------------------------------------------------------------------------------------------------------------------------------------|-----|
|                | algorithm.                                                                                                    |                   |                                                                                                                                                                               |     |
| Data_DOIs      | A list of DOIs provided that host data or code online that were detected by DataSeer algorithm.               |                   | Multiple DOIs separated by “,”                                                                                                                                                | Yes |
| Preprint_Match | Whether a preprint was identified for this published article when searching common DOI registration agencies. | DataSeer          | “Yes” or “No” indicating whether a match was found across DOI registration agencies. Match is completed using title and author information.<br>Queries Crossref and Datacite. | Yes |
| Preprint_DOI   | DOI of identified preprint match.                                                                             | Preprint Metadata | Gathered from DOI agency metadata.                                                                                                                                            | Yes |
| Preprint_Day   | Day of preprint DOI registration, usually same date as publication.                                           | Preprint Metadata | Note: Datacite DOI metadata does not always include a detailed date (will sometimes only include year level).                                                                 | Yes |
| Preprint_Month | Month of preprint DOI registration, usually same date as publication.                                         | Preprint Metadata | Note: Datacite DOI metadata does not always include a detailed date (will sometimes only include year level).                                                                 | Yes |
| Preprint_Year  | Year of preprint DOI registration, usually same date as publication.                                          | Preprint Metadata | Note: Datacite DOI metadata does not always include a detailed date (will sometimes only include year level).                                                                 | Yes |
| Preprint_URL   | URL to access top preprint match.                                                                             | Preprint Metadata | Provided where available, dependent on metadata.                                                                                                                              | Yes |

|                             |                                                                                                          |                   |                                                                                                                                                                                                      |     |
|-----------------------------|----------------------------------------------------------------------------------------------------------|-------------------|------------------------------------------------------------------------------------------------------------------------------------------------------------------------------------------------------|-----|
| Preprint_Server             | Server top preprint match is hosted on.                                                                  | Preprint Metadata | If server name is not provided in preprint metadata DOI prefix is used to identify server when possible.                                                                                             | Yes |
| Code_Section_Text_Generated | Which sections of the research article indicated code was generated when assessed by DataSeer algorithm. | DataSeer          | Labeled N/A if no code generation detected.<br>Multiple sections are separated by “ ” (e.g. Methods Supplementary)<br>If XML section tags are not available this will be labeled “Full Text”         | Yes |
| Code_Generated              | Was code generated in this text as assessed by DataSeer algorithm.                                       | DataSeer          | Labeled “Yes” or “No”                                                                                                                                                                                | Yes |
| Code_Shared                 | Was code shared in this text as assessed by DataSeer algorithm.                                          | DataSeer          | Labeled “Yes” or “No”<br>Note: Shared <i>code is only detected if it is executable</i> (e.g. shared as a .R or .py file format), code shared in pdf of other image formats is not labeled as shared. | Yes |
| Code_Location               | Location of code that was indicated as shared.                                                           | DataSeer          | Labeled “Online” when a repository was used.<br><br>Multiple sections are separated by “ ” (e.g. Online Supplementary)                                                                               | Yes |

|         |                                                                             |            |                                                       |     |
|---------|-----------------------------------------------------------------------------|------------|-------------------------------------------------------|-----|
| Quarter | Quarter of publication inferred from Publication_Month and Publication_Year | DataSeer   | Format is “Year Quarter”, e.g. “2020 Q1” or “2018 Q4” | Yes |
| ANZSRC  | Fields of Research categories as assigned by Dimensions                     | Dimensions | Multiple categories are separated by “;”              | Yes |
