# Supplementary material
Source: publisher figshare collection journal article supplement (https://plos.figshare.com/articles/dataset/_/21687686)
Supplement: Supplementary file 19 [file 8]

# Study Registration Column Descriptions

This file was prepared on 10 June 2024 by Marcel LaFlamme and is part of the dataset: Public Library of Science (2024) PLOS Open Science Indicators. Figshare. Dataset (version 7). <https://doi.org/10.6084/m9.figshare.21687686>.

## Named Contact Information

Name: Iain Hrynaskiewicz

ORCID: 0000-0002-9673-5559

Institution: Public Library of Science

Email: [ihrynaskiewicz@plos.org](mailto:ihrynaskiewicz@plos.org)

## Alternate Contact Information

Name: Lauren Cadwallader

ORCID: 0000-0002-7571-3502

Institution: Public Library of Science

Email: [lcadwallader@plos.org](mailto:lcadwallader@plos.org)

Column descriptions for data provided in Study-Registration-Dataset\_Jun24.csv. The Method column indicates how data is gathered, whether from XML file data or DataSeer's assessment.

| Column Name                   | Column Description                                                                                     | Method   | Additional Notes                                                                |
|-------------------------------|--------------------------------------------------------------------------------------------------------|----------|---------------------------------------------------------------------------------|
| DOI                           | Digital object identifier (DOI) for each article                                                       | XML      |                                                                                 |
| Registration_Shared           | Was one or more study registrations shared in this article, as assessed by DataSeer?                   | DataSeer | Options are "TRUE" or "FALSE"                                                   |
| Registries                    | Which registry/ies were used for the detected study registrations?                                     | DataSeer | Options are limited to the 31 registries that appear in Registry-List_Jun24.csv |
| Registration_Number           | Unique identifier assigned to the detected registration by the registry                                | DataSeer |                                                                                 |
| Registration_Section_Reported | Which sections of the article indicated that a study registration was shared, as assessed by DataSeer? | DataSeer |                                                                                 |
| Registration_Detected_As      | In what format was the information about the study registration presented?                             | DataSeer | Options are "text" or "link"                                                    |
| Pub_Day                       | Publication day of article                                                                             | XML      | "epub" date is used                                                             |
| Pub_Month                     | Publication month of article                                                                           | XML      | "epub" date is used                                                             |
| Pub_Year                      | Publication year of article                                                                            | XML      | "epub" date is used                                                             |
| Pub_Quarter                   | Publication quarter, based on the publication date                                                     | DataSeer | In form yearquarter; e.g., 2024Q1.                                              |
| Cohort                        | Which publisher cohort the article belongs to                                                          | XML      | Options are "PLOS" or "Comparator"                                              |
