# Supplementary material
Source: publisher figshare collection journal article supplement (https://plos.figshare.com/articles/dataset/_/21687686)
Supplement: Supplementary file 23 [file 9]

## Open Science Indicators Column Descriptions

This file was originally prepared on 07-12-2022 by Allegra Pearce and Lauren Cadwallader (v1), was updated on 8-3-2022 (v2) and again on 12-12-2023 (v3). This version is v4 and was updated on 09-12-2024 by Lauren Cadwallader. It is part of the dataset: Public Library of Science (2022) PLOS Open Science Indicators. Figshare. Dataset (version 9).

<https://doi.org/10.6084/m9.figshare.21687686>.

### Named contact Information

Name: Iain Hrynaskiewicz

ORCID: 0000-0002-9673-5559

Institution: Public Library of Science

Email: [ihrynaskiewicz@plos.org](mailto:ihrynaskiewicz@plos.org) / plos@plos.org

### Alternate Contact Information

Name: Lauren Cadwallader

ORCID: 0000-0002-7571-3502

Institution: Public Library of Science

Email: [lcadwallader@plos.org](mailto:lcadwallader@plos.org) / plos@plos.org

Column descriptions for data provided in PLOS-Dataset\_v9\_Dec24.csv and Comparator-Dataset\_v9\_Dec24.csv and later versions until superseded by a new column descriptions version. The Method column indicates how data is gathered, whether from XML file data, OpenAlex or found by DataSeer's assessment.

| Column Name       | Column description                    | Method | Additional Notes    | Present in comparator set?<br>Additional notes. |
|-------------------|---------------------------------------|--------|---------------------|-------------------------------------------------|
| Publication_Day   | Day of publication for each article   | XML    | "epub" date is used |                                                 |
| Publication_Month | Month of publication for each article | XML    | "epub" date is used |                                                 |

|                              |                                                                            |          |                                                                                                                                                         |                                                                                                                                    |
|------------------------------|----------------------------------------------------------------------------|----------|---------------------------------------------------------------------------------------------------------------------------------------------------------|------------------------------------------------------------------------------------------------------------------------------------|
| Publication_Year             | Year of publication for each article                                       | XML      | “epub” date is used                                                                                                                                     |                                                                                                                                    |
| DOI                          | Digital object identifier (DOI) for each article                           | XML      |                                                                                                                                                         | Yes                                                                                                                                |
| Primary_Topic_Field          | High level subject classification for each article                         | OpenAlex | OpenAlex schema lists 26 possible categories for field                                                                                                  | Yes                                                                                                                                |
| Primary_Topic_Subfield       | Granular subject classification for each article                           | OpenAlex | OpenAlex schema lists 252 possible categories for subfield                                                                                              | Yes                                                                                                                                |
| Discipline                   | Disciplinary information taken from the Major MeSH terms for each article  | XML      |                                                                                                                                                         | <b>Present for Comparator dataset only.</b>                                                                                        |
| Corresponding_Author_Country | Country of the listed affiliation of the first listed corresponding author | OpenAlex | If multiple affiliations are listed the first one is used. If multiple corresponding authors are listed, the first listed corresponding author is used. | Yes                                                                                                                                |
| First_Author_Country         | Country of the first author (from all listed authors)                      | OpenAlex | If multiple affiliations are listed the first one is used.                                                                                              | Yes                                                                                                                                |
| DA_data                      | The article’s data availability statement                                  | XML      |                                                                                                                                                         | Yes. It comprises any Availability type statements (e.g. Data Availability or Code Availability) found in the article. If multiple |

|                             |                                                                                                                                                                                                                                                                                         |          |                                                                                                                                                                                                   |                                                               |
|-----------------------------|-----------------------------------------------------------------------------------------------------------------------------------------------------------------------------------------------------------------------------------------------------------------------------------------|----------|---------------------------------------------------------------------------------------------------------------------------------------------------------------------------------------------------|---------------------------------------------------------------|
|                             |                                                                                                                                                                                                                                                                                         |          |                                                                                                                                                                                                   | statements are found they are separated by the “ ” character. |
| Data_Section_Text_Generated | Which sections of the research article indicated data was generated when assessed by DataSeer algorithm.                                                                                                                                                                                | DataSeer | Labeled N/A if no data/code generation detected.<br>Multiple sections are separated by “ ” (e.g. Methods Supplementary)<br>If XML section tags are not available this will be labeled “Full Text” | Yes                                                           |
| Data_Generated              | Was data generated in this text as assessed by DataSeer algorithm.                                                                                                                                                                                                                      | DataSeer | Labeled “Yes” or “No”                                                                                                                                                                             | Yes                                                           |
| Data_Shared                 | Was data shared in this text as assessed by DataSeer algorithm.                                                                                                                                                                                                                         | DataSeer | Labeled “Yes” or “No”                                                                                                                                                                             | Yes                                                           |
| Data_location               | Location of data that was indicated as shared.                                                                                                                                                                                                                                          | DataSeer | Labeled “Online” when a repository was used.<br><br>Multiple sections are separated by “ ” (e.g. Online Supplementary)                                                                            | Yes                                                           |
| Repositories_data           | A list of standard repositories that were identified by DataSeer as having been used in the sharing of data/code in each article. Repositories are identified from URL/DOI/Accession IDs where possible. Only repositories from a standardized list will be identified. Domains will be | DataSeer | Multiple repositories separated by “ ” (e.g. Github Dryad)                                                                                                                                        | Yes                                                           |

|                |                                                                                                                              |                   |                                                                                                                                                                            |     |
|----------------|------------------------------------------------------------------------------------------------------------------------------|-------------------|----------------------------------------------------------------------------------------------------------------------------------------------------------------------------|-----|
|                | provided for unidentified URLs where possible.                                                                               |                   |                                                                                                                                                                            |     |
| URL_data       | A list of any URLs provided that host data or code online that were detected by DataSeer algorithm.                          | DataSeer          | Multiple URLs separated by “,”                                                                                                                                             | Yes |
| Accessions     | A list of Accession IDs from identified repositories that host data or code online that were detected by DataSeer algorithm. | DataSeer          | Multiple Accession IDs separated by “,”                                                                                                                                    | Yes |
| Data_DOIs      | A list of DOIs provided that host data or code online that were detected by DataSeer algorithm.                              |                   | Multiple DOIs separated by “,”                                                                                                                                             | Yes |
| Preprint_Match | Whether a preprint was identified for this published article when searching common DOI registration agencies.                | DataSeer          | “Yes” or “No” indicating whether a match was found across DOI registration agencies. Match is completed using title and author information. Queries Crossref and Datacite. | Yes |
| Preprint_DOI   | DOI of identified preprint match.                                                                                            | Preprint Metadata | Gathered from DOI agency metadata.                                                                                                                                         | Yes |
| Preprint_Day   | Day of preprint DOI registration, usually same date as publication.                                                          | Preprint Metadata | Note: Datacite DOI metadata does not always include a detailed date (will sometimes only include year level).                                                              | Yes |
| Preprint_Month | Month of preprint DOI registration, usually same date as publication.                                                        | Preprint Metadata | Note: Datacite DOI metadata does not always include a                                                                                                                      | Yes |

|                             |                                                                                                          |                   |                                                                                                                                                                                              |     |
|-----------------------------|----------------------------------------------------------------------------------------------------------|-------------------|----------------------------------------------------------------------------------------------------------------------------------------------------------------------------------------------|-----|
|                             |                                                                                                          |                   | detailed date (will sometimes only include year level).                                                                                                                                      |     |
| Preprint_Year               | Year of preprint DOI registration, usually same date as publication.                                     | Preprint Metadata | Note: Datacite DOI metadata does not always include a detailed date (will sometimes only include year level).                                                                                | Yes |
| Preprint_URL                | URL to access top preprint match.                                                                        | Preprint Metadata | Provided where available, dependent on metadata.                                                                                                                                             | Yes |
| Preprint_Server             | Server top preprint match is hosted on.                                                                  | Preprint Metadata | If server name is not provided in preprint metadata DOI prefix is used to identify server when possible.                                                                                     | Yes |
| Code_Section_Text_Generated | Which sections of the research article indicated code was generated when assessed by DataSeer algorithm. | DataSeer          | Labeled N/A if no code generation detected.<br>Multiple sections are separated by “ ” (e.g. Methods Supplementary)<br>If XML section tags are not available this will be labeled “Full Text” | Yes |
| Code_Generated              | Was code generated in this text as assessed by DataSeer algorithm.                                       | DataSeer          | Labeled “Yes” or “No”                                                                                                                                                                        | Yes |
| Code_Shared                 | Was code shared in this text as assessed by DataSeer algorithm.                                          | DataSeer          | Labeled “Yes” or “No”<br>Note: Shared <i>code is only detected if it is executable</i> (e.g. shared as a .R or .py file                                                                      | Yes |

|               |                                                                             |          |                                                                                                                               |     |
|---------------|-----------------------------------------------------------------------------|----------|-------------------------------------------------------------------------------------------------------------------------------|-----|
|               |                                                                             |          | format), code shared in pdf of other image formats is not labeled as shared.                                                  |     |
| Code_Location | Location of code that was indicated as shared.                              | DataSeer | <p>Labeled “Online” when a repository was used.</p> <p>Multiple sections are separated by “ ” (e.g. Online Supplementary)</p> | Yes |
| Quarter       | Quarter of publication inferred from Publication_Month and Publication_Year | DataSeer | Format is “Year Quarter”, e.g. “2020 Q1” or “2018 Q4”                                                                         | Yes |
